# Supplementary material for: Effects of brief family psychoeducation for caregivers of people with schizophrenia in Japan provided by visiting nurses: protocol for a cluster randomised controlled trial
Source: PubMed Central journal article supplement — BMJ Open. 2020 Apr 9;10(4):e034425. doi: 10.1136/bmjopen-2019-034425 (PMC7170625; doi:10.1136/bmjopen-2019-034425), 2020-04-09
Supplement: bmjopen-2019-034425.draft_revisions.pdf [file bmjopen-2019-034425.draft_revisions.pdf]

# BMJ Open

BMJ Open is committed to open peer review. As part of this commitment we make the peer review history of every article we publish publicly available.

When an article is published we post the peer reviewers' comments and the authors' responses online. We also post the versions of the paper that were used during peer review. These are the versions that the peer review comments apply to.

The versions of the paper that follow are the versions that were submitted during the peer review process. They are not the versions of record or the final published versions. They should not be cited or distributed as the published version of this manuscript.

BMJ Open is an open access journal and the full, final, typeset and author-corrected version of record of the manuscript is available on our site with no access controls, subscription charges or pay-per-view fees (<http://bmjopen.bmj.com>).

If you have any questions on BMJ Open's open peer review process please email [info.bmjopen@bmj.com](mailto:info.bmjopen@bmj.com)

# BMJ Open

## Effects of brief family psychoeducation for caregivers of people with schizophrenia in Japan provided by visiting nurses: protocol for a cluster randomized controlled trial

|                               |                                                                                                                                                                                                                                                                                                                                                                                                                                                                                                                                                                                                                                                                                                                                                                                                                                                                                                                                                                                                                           |
|-------------------------------|---------------------------------------------------------------------------------------------------------------------------------------------------------------------------------------------------------------------------------------------------------------------------------------------------------------------------------------------------------------------------------------------------------------------------------------------------------------------------------------------------------------------------------------------------------------------------------------------------------------------------------------------------------------------------------------------------------------------------------------------------------------------------------------------------------------------------------------------------------------------------------------------------------------------------------------------------------------------------------------------------------------------------|
| Journal:                      | <i>BMJ Open</i>                                                                                                                                                                                                                                                                                                                                                                                                                                                                                                                                                                                                                                                                                                                                                                                                                                                                                                                                                                                                           |
| Manuscript ID                 | bmjopen-2019-034425                                                                                                                                                                                                                                                                                                                                                                                                                                                                                                                                                                                                                                                                                                                                                                                                                                                                                                                                                                                                       |
| Article Type:                 | Protocol                                                                                                                                                                                                                                                                                                                                                                                                                                                                                                                                                                                                                                                                                                                                                                                                                                                                                                                                                                                                                  |
| Date Submitted by the Author: | 21-Sep-2019                                                                                                                                                                                                                                                                                                                                                                                                                                                                                                                                                                                                                                                                                                                                                                                                                                                                                                                                                                                                               |
| Complete List of Authors:     | <p>Yasuma, Naonori; The University of Tokyo, ;<br/> Sato, Sayaka; National Institute of Mental Health, Community mental health and law; NCNP<br/> Matsunaga, Asami; National Center of Neurology and Psychiatry, Department of Community Mental Health &amp; Law, National Institute of Mental Health<br/> Yamaguchi, Sosei; National Center of Neurology and Psychiatry, Department of Community Mental Health &amp; Law, National Institute of Mental Health<br/> Shiozawa, Takuma; National Center of Neurology and Psychiatry, Watanabe, Kazuhiro; The University of Tokyo, Department of Mental Health, Graduate School of Medicine<br/> Imamura, Kotaro<br/> Tachimori, Hisateru; National Center of Neurology and Psychiatry Translational Medical Center<br/> Nishi, Daisuke<br/> Fujii, Chiyo; National Center of Neurology and Psychiatry, Department of Community Mental Health &amp; Law, National Institute of Mental Health<br/> Kawakami, Norito; The University of Tokyo, Department of Mental Health</p> |
| Keywords:                     | Brief family psychoeducation, schizophrenia, caregivers, visiting nurses                                                                                                                                                                                                                                                                                                                                                                                                                                                                                                                                                                                                                                                                                                                                                                                                                                                                                                                                                  |
|                               |                                                                                                                                                                                                                                                                                                                                                                                                                                                                                                                                                                                                                                                                                                                                                                                                                                                                                                                                                                                                                           |

SCHOLARONE™  
Manuscripts

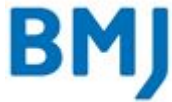

I, the Submitting Author has the right to grant and does grant on behalf of all authors of the Work (as defined in the below author licence), an exclusive licence and/or a non-exclusive licence for contributions from authors who are: i) UK Crown employees; ii) where BMJ has agreed a CC-BY licence shall apply, and/or iii) in accordance with the terms applicable for US Federal Government officers or employees acting as part of their official duties; on a worldwide, perpetual, irrevocable, royalty-free basis to BMJ Publishing Group Ltd ("BMJ") its licensees and where the relevant Journal is co-owned by BMJ to the co-owners of the Journal, to publish the Work in this journal and any other BMJ products and to exploit all rights, as set out in our [licence](#).

The Submitting Author accepts and understands that any supply made under these terms is made by BMJ to the Submitting Author unless you are acting as an employee on behalf of your employer or a postgraduate student of an affiliated institution which is paying any applicable article publishing charge ("APC") for Open Access articles. Where the Submitting Author wishes to make the Work available on an Open Access basis (and intends to pay the relevant APC), the terms of reuse of such Open Access shall be governed by a Creative Commons licence – details of these licences and which [Creative Commons](#) licence will apply to this Work are set out in our licence referred to above.

Other than as permitted in any relevant BMJ Author's Self Archiving Policies, I confirm this Work has not been accepted for publication elsewhere, is not being considered for publication elsewhere and does not duplicate material already published. I confirm all authors consent to publication of this Work and authorise the granting of this licence.

1  
2  
3  
4  
5  
6  
7  
8  
9  
10  
11  
12  
13  
14  
15  
16  
17  
18  
19  
20  
21  
22  
23  
24  
25  
26  
27  
28  
29  
30  
31  
32  
33  
34  
35  
36  
37  
38  
39  
40  
41  
42  
43  
44  
45  
46  
47  
48  
49  
50  
51  
52  
53  
54  
55  
56  
57  
58  
59  
60

## Effects of brief family psychoeducation for caregivers of people with schizophrenia in Japan provided by visiting nurses: protocol for a cluster randomized controlled trial

Naonori Yasuma<sup>1,2</sup>: nnyy712@gmail.com

Sayaka Sato<sup>2</sup>: sayakas@ncnp.go.jp

Asami Matsunaga<sup>2</sup>: asamim@ncnp.go.jp

Sosei Yamaguchi<sup>2</sup>: sosei.yama@ncnp.go.jp

Takuma Shiozawa<sup>2</sup>: takuma-shozw@umin.ac.jp

Hisateru Tachimori<sup>3</sup>: tachi@ncnp.go.jp

Kazuhiro Watanabe<sup>1</sup>: kzwatanabe-tky@umin.ac.jp

Kotaro Imamura<sup>1</sup>: kouima-tky@umin.ac.jp

Daisuke Nishi<sup>1</sup>: d-nishi@m.u-tokyo.ac.jp

Chiyo Fujii<sup>2</sup>: chyfujii@ncnp.go.jp

Norito Kawakami<sup>1</sup>: nkawakami@m.u-tokyo.ac.jp

1 Department of Graduate School of Medicine, The University of Tokyo

2 Department of Community Mental Health and Law, National Institute of Mental Health, National Center of Neurology and Psychiatry, Kodaira, Tokyo, Japan

3 Department of Translational Medical Center, National Institute of Mental Health, National Center of Neurology and Psychiatry, Kodaira, Tokyo, Japan

Corresponding author:

Naonori Yasuma, MD

Department of Mental Health, Graduate School of Medicine, The University of Tokyo,  
7-3-1 Hongo, Bunkyo-ku, Tokyo 1130033 Japan

E-mail: nnyy712@gmail.com

Phone: +81-3-5841-3521

Fax: +81-3-5841-3521

Word count: 4,190 words

## ABSTRACT

### Introduction

Development of a support system for families caring for people with schizophrenia in routine psychiatric care settings is an important issue worldwide. Regional mental health systems are inadequate for delivering effective services to such family members. Despite evidence that family psychoeducation (FPE) alleviates the burden of schizophrenia on families, its dissemination in routine clinical practice remains insufficient, suggesting the need for developing an effective and implementable intervention for family caregivers in the existing mental health system setting. In Japan, the visiting nurse service system would be a practical way of providing family services. Visiting nurses in local communities are involved in the everyday lives of people with schizophrenia and their families. Accordingly, they understand their needs and are able to provide family support as a service covered by national health insurance. The purpose of this study is to discover whether a brief FPE program provided by visiting nurses caring for people with schizophrenia will alleviate family burden through a cluster randomised controlled trial (cRCT).

### Methods and analysis

The study will be a two-arm, parallel-group (a visiting nurse agency) cRCT. Forty-seven visiting nurse agencies will be randomly allocated to the brief FPE group (intervention group) or treatment as usual group (control group). Caregivers of people with schizophrenia will be randomly recruited by visiting nurses. The primary outcome will be caregiver burden, measured using the Zarit Burden Interview–Japanese version (ZBI-J-22). Outcome assessments will be conducted at baseline, at 1-month follow-up, and at 6-month follow-up. Multiple levels of three-way interaction of mixed models will be conducted to examine whether the brief FPE program will alleviate the burden on caregivers relative to treatment as usual.

### Ethics and dissemination

The Research Ethics Committee of the Graduate School of Medicine and Faculty of Medicine, the University of Tokyo, Japan (No. 2019065NI) approved this study. The results will be published in a scientific peer-reviewed journal.

### Registration number

UMIN000038044; Pre-results.

## INTRODUCTION

Families caring for people with schizophrenia receiving mental health care in the community have a great need for support. Schizophrenia, a chronic psychiatric illness that requires long-term care, imposes a significant burden on families providing such care.<sup>1</sup> For example, the financial burden on the family is severe because considerable amounts of time are devoted to caregiving, resulting in the loss of work opportunities and reduced income.<sup>2</sup> Moreover, insufficient downtime to recover from the stress of caregiving results in both physical and mental illnesses.<sup>3</sup> Families also become worn out and stressed by the demands of coping with this illness, which is characterized by repeated hallucinations and delusions if symptoms do not stabilize.<sup>4</sup> Furthermore, a parent of a schizophrenic son or daughter might worry about what will become of their child after his or her death. They might also feel they are not getting adequate information about what social services are available to them.<sup>5</sup> Stigma against the illness is also deeply rooted and can lead to families becoming socially isolated.<sup>3</sup> Therefore, families of people with schizophrenia have various physical, psychological, economic, and social burdens.

Several studies have addressed the development and evaluation of effective family interventions. According to a systematic review, family psychoeducation (FPE) is a scientifically effective psychological intervention that has been used to reduce caregiver burden.<sup>6,7</sup> The components of FPE mainly include information sharing about the disorder, early warning signs, and relapse prevention as well as and skills training in coping, communication, and problem solving.<sup>8</sup> FPE was considered to directly improve caregivers' knowledge about schizophrenia and related caregiving problems.<sup>9</sup> Improved knowledge of coping strategies and resources can lead to a more positive appraisal of families' caregiving experiences as well as the caregivers' own self-efficacy in coping with the demands of caring for people with schizophrenia, thereby lessening the burden.<sup>6</sup>

Despite the accumulation of evidence, there are several barriers to FPE implementation. The initial report on the Schizophrenia Patient Outcomes Research Team (PORT) Treatment Recommendations found that FPE was provided to 31.6% of inpatients and 9.6% of outpatients who could have benefited from it.<sup>10</sup> A nationwide survey in Japan revealed that implementation rates for FPE programs in psychiatric facilities are similarly low: 35.9% in hospitals and 14.5% in clinics.<sup>11</sup> One challenge in implementing these programs is the length of the intervention. Most research has found that such interventions range from 9 months to 2 years, which is impractical for medical staff and families in a clinical setting.<sup>12</sup> Other reasons include funding and staff

1  
2  
3  
4  
5  
6 shortages, as well as providing necessary training.<sup>13</sup> For example, in Japan, FPE does  
7 not incur a medical treatment fee, even if it is performed for a family. In addition, while  
8 the Meriden Family Program appears to be effective, training takes "a large amount of  
9 hours and money."<sup>14</sup> The medical treatment fee system in most countries including  
10 Japan does not cover such a comprehensive family intervention. The development of a  
11 brief and implementable FPE program within the existing mental health system that is  
12 covered by national health insurance is greatly needed.<sup>15</sup>

16 Brief FPE programs have been examined in previous studies. In terms of the  
17 program framework, studies have found that brief FPE programs, delivered in five  
18 sessions or fewer or lasting no more than 3 months, were easy to conduct for both  
19 practitioners and caregivers.<sup>16</sup> Brief FPE programs have been shown to significantly  
20 increase caregivers' knowledge of the disorder, leading to reductions in relapse and  
21 rehospitalisation rates in diverse settings.<sup>17,18</sup> In addition, recent research has shown that  
22 a brief FPE program may be beneficial in reducing caregiver burden. In a pre-post test in  
23 India, a brief FPE program comprised of three 1-hour sessions aimed at educating the  
24 primary caregiver and patient about schizophrenia, communication skills, and problem-  
25 solving skills. A significant decrease in caregiver burden, measured using the Burden  
26 Assessment Scale (BAS), was found between baseline and the final follow-up at 3  
27 months.<sup>19</sup> In a randomised controlled trial in Iran, brief FPE consisted of ten 90-minute  
28 sessions held over 5 weeks (two sessions each week) conducted by a psychiatric nurse or  
29 psychiatrist. Caregiver burden measured using the Family Burden Scale (FBS) was  
30 significantly reduced both immediately after the intervention and 1 month later.<sup>20</sup>  
31 However, the effects of brief FPE programs were still inconclusive due to relatively low  
32 methodological quality in prior studies.<sup>7,16</sup> In other words, evidence from a trial with a  
33 better design is needed.

34  
35  
36  
37  
38  
39  
40  
41  
42  
43 Practical implementation strategies for a brief FPE program need to be  
44 considered in addition to a scientific evaluation of the effects. Brief FPE programs  
45 provided by visiting nurses appear to be a potentially feasible and sustainable way of  
46 implementing FPE in a Japanese clinical setting. Visiting nurses routinely visit clients  
47 with schizophrenia and their family members. They have already built rapport with  
48 clients and family members and would be able to respond according to their needs,  
49 which means they could seamlessly provide highly individualized brief FPE.<sup>21</sup> In  
50 addition, the system of visiting nurses could easily be applied because the number of  
51 visiting nurses has been increasing recently in Japan. From a cost perspective, it would  
52 be possible to make family support a reimbursable service under national health  
53 insurance to cover psychiatric visiting nurse consultancy fees.<sup>22</sup> Taken together, brief  
54  
55  
56  
57  
58  
59  
60

1  
2  
3  
4  
5  
6 FPE provided by visiting nurses could overcome the poor implementation rate and  
7 become effective family interventions in the community setting in Japan. The purpose  
8 of this study is to clarify, through a cluster randomised controlled trial (cRCT), whether  
9 visiting nurses providing brief FPE to families caring for people with schizophrenia will  
10 alleviate family burden.  
11  
12

## 13 14 **METHODS AND ANALYSIS**

### 15 **Trial design**

16 This study is a two-arm, parallel-group cRCT. The randomisation procedure is  
17 conducted at the cluster level (visiting nurse agencies). Visiting nurse agencies will be  
18 randomly assigned to the intervention or control (treatment as usual (TAU)) group in a  
19 1:1 ratio. Data will be collected at the individual level. Analyses to evaluate the efficacy  
20 of the intervention program will be conducted at the individual level, taking into  
21 consideration cluster-level effects. The study protocol was registered in the University  
22 Hospital Medical Information Network (UMIN) Clinical Trials Registry (UMIN-CTR  
23 ID, UMIN000038044). This protocol was reported according to the Standard Protocol  
24 Items: Recommendations for Interventional Trials (SPIRIT) guidelines.<sup>23</sup>  
25  
26  
27  
28  
29  
30  
31

### 32 **Setting and site selection at the cluster level**

33 Figure 1 shows the participant flow chart for this study. We recruited 47 visiting nurse  
34 agencies in four prefectures in Japan, namely Tokyo, Saitama, Kanagawa, and Chiba  
35 prefectures. All the participating visiting nurse agencies are managed by one  
36 organisation. The corresponding author (NY) explained the purpose of this study to the  
37 organisation and asked the organisation to recruit 47 visiting nurse agencies.  
38  
39

40 To be included, a visiting nurse agency must have been mainly providing services  
41 for psychiatric patients or clients, not elderly people or those with other physical  
42 diseases, for at least 1 year. In each agency, visiting nurses care for at least two people  
43 with schizophrenia who live with their family. There are no exclusion criteria at the  
44 cluster level.  
45  
46  
47  
48  
49

### 50 **Participant eligibility criteria and recruitment procedure at the individual level**

51 At the individual level, we set the following inclusion criteria for a caregiver of a person  
52 with schizophrenia: 1) is the primary caregiver; 2) aged over 20 years; 3) is a family  
53 member of the person with schizophrenia such as a parent, sibling, spouse, or child; and  
54 4) lives with the person with schizophrenia. There are no exclusion criteria for  
55 caregivers. In addition, the inclusion criteria for people with schizophrenia are as  
56  
57  
58  
59  
60



1  
2  
3  
4  
5  
6 follows: 1) diagnosis of schizophrenia based on the International Statistical  
7 Classification of Diseases and Related Health Problems, 10th revision and 2) use of  
8 visiting nurse services.  
9

10 In each agency, potential participants (caregivers of people with schizophrenia  
11 and people with schizophrenia) will be randomly extracted using a recruitment sequence  
12 table. The recruitment sequence table will be created using a random number generation  
13 method with the Stata statistical software program, version 15. Based on the recruitment  
14 sequence table, consent acquisition will be performed by visiting nurses who have  
15 attended a lecture on study design and ethical considerations. The study will include  
16 only caregivers who voluntarily agree to participate in the study. The average cluster  
17 size will be approximately five caregivers. Visiting nurse agencies will be allocated  
18 randomly to the intervention or control group. The intervention program will last one  
19 month. The study has three planned assessment points including baseline assessment  
20 prior to the intervention (T1), immediately after the completion of the intervention (1-  
21 month follow-up assessment, T2), and 6 months after the baseline assessment (6-month  
22 follow-up assessment, T3) in both the intervention and control groups.  
23  
24  
25  
26  
27  
28  
29

### 30 31 **Intervention program**

32 The intervention program is a single-family intervention conducted by psychiatric  
33 visiting nurses. It is based on the Family Intervention and Support in Schizophrenia: A  
34 Manual on Family Intervention for the Mental Health Professional.<sup>24</sup> This program was  
35 developed through discussions and collaborations among members of the Family  
36 Association of Schizophrenia, psychiatric visiting nurses, FPE experts, psychiatrists,  
37 psychiatric nurses, clinical psychologists, and mental health social workers based on the  
38 concept of coproduction and Patient and Public Involvement (PPI).<sup>25</sup> During the  
39 development process, we tried to avoid long sentences, enlarged the characters, and  
40 used visually appealing drawings. The program consists of four sessions that last 60  
41 minutes each using the above tool. It will be completed over a period of a month.  
42 Psychiatric visiting nurses will provide appropriate information using this intervention  
43 tool and advice to the family about living problems based on their own nursing clinical  
44 experience.  
45  
46  
47  
48  
49  
50  
51

52 Before the intervention, we will provide the intervention team of psychiatric  
53 visiting nurses with a 1-day lecture. The lecture will consist of three parts. First, a  
54 caregiver of a person with schizophrenia will talk about their life problems and what  
55 they want visiting nurses to do; this is expected to increase the motivation of visiting  
56 nurses. Second, basic communication training will be conducted through role-playing.  
57  
58  
59  
60

1  
2  
3  
4  
5  
6 Visiting nurses, who will be brief FPE providers, will be in groups of three. They will  
7 each play the role of a visiting nurse, caregiver, and evaluator. They will practice  
8 listening to caregivers. Third, the primary investigator (NY) will equip them with basic  
9 knowledge about FPE and explain the contents of this intervention tool and the points  
10 the primary investigator wants to emphasise. Through these trainings, we expect to  
11 improve the motivation, knowledge, and skills of the visiting nurses in providing the  
12 brief FPE program.  
13  
14  
15

16 Table 1 shows the contents of the intervention tool. Session I covers general  
17 knowledge about schizophrenia: definition, causes, symptoms, prognosis,  
18 pharmacological treatment, and psychosocial rehabilitation. Regarding definition and  
19 causes, visiting nurses will stress that schizophrenia is a brain disease that can manifest  
20 in anyone using the diathesis-stress model and the dopamine hypothesis. It is important  
21 to provide the family with a biological explanation about the aetiology of schizophrenia  
22 because there might be family members who think people become schizophrenic  
23 because of family relationships.<sup>26</sup> In addition to an explanation of the symptoms  
24 themselves, visiting nurses will describe how people with schizophrenia have  
25 difficulties living their own lives due to their symptoms. Visiting nurses will explain the  
26 disease course such as the prodromal phase, acute phase, and recovery phase. Next,  
27 visiting nurses will explain the characteristics of each phase and what to do during each  
28 phase. In terms of prognosis, visiting nurses will address that over 70% of people can  
29 recover if they receive appropriate pharmacological therapy.<sup>27</sup> Concerning medication,  
30 visiting nurses will appreciate the idea that people with schizophrenia usually do not  
31 want to take medication. Visiting nurses will talk about the necessity, safety, and  
32 reasons for adherence to pharmacological therapy. In addition, the side effects of  
33 antipsychotic medications will be described clearly, using relevant pictures. Finally,  
34 visiting nurses will give an outline of psychosocial therapy. At the end, participants will  
35 answer questions with dichotomous answers—“yes” or “no”—to confirm what they  
36 have learned from the session.  
37  
38  
39  
40  
41  
42  
43  
44  
45  
46  
47

48 Session II deals with how to cope with people with schizophrenia and problem-  
49 solving skills. The contents of this session include how to cope with hallucinations and  
50 delusions; signs of recurrence; how to prevent recurrences; how to cope when the  
51 disease gets worse; what to do with people with schizophrenia when they stay at home  
52 all day; how to respond to people with schizophrenia who do not want to take their  
53 medication; how to respond when domestic violence is imminent, is occurring, or has  
54 occurred; and how to get involved when self-injury or suicide is suspected. Finally,  
55 visiting nurses will explain problem-solving skills. In the routine clinical setting, the  
56  
57  
58  
59  
60

1  
2  
3  
4  
5  
6 family will work on matters that are causing trouble in daily life using problem-solving  
7 skills.  
8

9  
10 Session III includes communication and emotions: understanding the feelings of  
11 people with schizophrenia, expressed emotion (EE) theory, basic knowledge and skills  
12 about communication, and a lecture on desirable and undesirable communication with  
13 people with schizophrenia. In the first section, visiting nurses will describe the  
14 importance of understanding that people with schizophrenia are likely to have a  
15 pessimistic view about their future. In the second section on EE theory, visiting nurses  
16 will appreciate that it is natural for a family to have high EE with poor knowledge and  
17 lack of support about mental illness.<sup>28</sup> Of note, visiting nurses are not forcing family  
18 members to play the role of supporter. When family members hear the explanation of  
19 high EE, many might feel that they are responsible for their burden. Visiting nurses will  
20 emphasise that both families and people with schizophrenia should think about positive  
21 and constructive communication to ensure mutual independence. In the third section on  
22 basic knowledge about communication and the lecture of desirable and undesirable  
23 communication with patients, caregivers will practice conversations using real cases and  
24 will be given time to consider better communication strategies.  
25  
26  
27  
28  
29  
30

31 Session IV focuses on the family's recovery. Topics include thinking about the  
32 family's recovery, the importance of living one's own life, taking care of the family's  
33 physical and mental health needs, proper stress management, experiences and messages  
34 from members of the Family Association, and identifying available social resources in  
35 the community. During this session, visiting nurses will stress that people with  
36 schizophrenia and family members each have their own lifestyle and individual goals.  
37 Visiting nurses will also encourage family members to live their own lives using a  
38 variety of social resources instead of working hard to take care of a person with  
39 schizophrenia. In addition, visiting nurses expect that the family will improve their  
40 physical and mental health by acquiring knowledge on self-care and stress management  
41 skills. Furthermore, visiting nurses will introduce the experiences of three members of  
42 the Family Association who have taken care of a person with schizophrenia. It is  
43 expected that others' similar experiences will help family members understand that they  
44 are not the only people experiencing such a hard time and relieve their feelings of  
45 sadness or hopelessness. Finally, visiting nurses will explain the social resources  
46 available in the community for family members and confirm the importance of  
47 connecting with many supporters around them.  
48  
49  
50  
51  
52  
53  
54  
55  
56  
57

## 58 **Control group**

1  
2  
3  
4  
5  
6 Visiting nurse agencies in the control group will offer TAU. Caregivers enrolled in the  
7 control group will be put on a waiting list to receive the same intervention program after  
8 completing the 6-month follow-up assessment.  
9

## 10 11 **Outcomes**

12  
13 Table 2 shows an overview of the outcome measures. Outcome measures will be  
14 assessed baseline assessment prior to the intervention (T1), immediately after the  
15 completion of the intervention (1-month follow-up assessment, T2), and 6 months after  
16 the baseline assessment (6-month follow-up assessment, T3).  
17  
18

### 19 20 **Primary outcome for caregivers**

#### 21 Zarit burden interview (ZBI-22)

22 ZBI-22 is used to measure caregiver burden. It consists of 22 items scored on a five-  
23 point Likert scale from 0 (never) to 4 (nearly always), except for the final item on global  
24 burden, which is rated from 0 (not at all) to 4 (extremely). The total score ranges from 0  
25 to 88, with higher scores indicating higher burden. The Japanese version of ZBI-22 had  
26 a high test-retest reproducibility and internal consistency. Construct validity has also  
27 been confirmed.<sup>29</sup>  
28  
29  
30  
31  
32  
33

### 34 **Secondary outcome for caregivers**

#### 35 K6

36 K6 is used to measure non-clinical depression and anxiety disorders as part of a self-  
37 administered questionnaire. It consists of six items answered on a five-point Likert  
38 scale. Scores thus range from 0 to 24, with higher scores representing higher degrees of  
39 non-clinical depression and anxiety disorder. The Japanese versions of the K6 have  
40 essentially equivalent screening performance as the original English versions.<sup>30</sup>  
41  
42  
43  
44  
45

#### 46 General Self Efficacy Scale (GSES)

47 GSES is a measurement of self-efficacy in daily living. It includes 16 items with  
48 dichotomous questions. The higher the score, the better the self-efficacy, in general.  
49 GSES had high test-retest reproducibility and internal consistency. Construct validity  
50 has been confirmed.<sup>31</sup>  
51  
52  
53  
54

#### 55 WHO-5

56 WHO-5 is used to measure subjective quality of life based on positive mood (good  
57 spirits and relaxation), vitality (being active and waking up fresh and rested), and  
58  
59  
60

1  
2  
3  
4  
5  
6 general interest (being interested in things). It consists of five items rated on a six-point  
7 Likert scale. Higher scores mean higher well-being. The Japanese version of WHO-5  
8 has adequate internal consistency. It was also confirmed to have external concurrent  
9 validity and external discriminatory validity.<sup>32</sup>  
10  
11  
12

### 13 Knowledge of Illness and Drug Inventory (KIDI)

14 KIDI is used to assess knowledge regarding mental illness and the effects of  
15 medications on mental illness. There are two sub-scales: 10 items assessing knowledge  
16 of mental illness and 10 items assessing knowledge of the effects of antipsychotic  
17 drugs. This inventory consists of a self-reported inventory where respondents are asked  
18 to select the correct answer from three choices, with higher scores representing greater  
19 knowledge. KIDI is frequently used to assess knowledge about mental disorders and  
20 treatments in Japan.<sup>33</sup>  
21  
22  
23  
24  
25  
26

### 27 **Primary outcome for people with schizophrenia**

#### 28 Behavior and Symptoms Identification Scale (BASIS-32)

29 BASIS-32 is a commonly used measure in mental health. It includes 32 items on a five-  
30 point Likert scale, where 0 indicates no difficulties and 4 indicates severe difficulties.  
31 The scale measures five factors: (1) relation to self and others (seven items); (2)  
32 depression/anxiety (six items); (3) everyday life and role functioning (nine items); (4)  
33 impulsive and addictive behaviour (six items); and (5) psychosis (four items). Factors 1,  
34 2, 4, and 5 are assessed as the total score divided by the number of items answered  
35 (mean score), while factor 3 is assessed based non the highest rating. Internal  
36 consistency and construct validity of the Japanese version of BASIS-32 have been  
37 demonstrated.<sup>34</sup>  
38  
39  
40  
41  
42  
43  
44

### 45 **Secondary outcome for people with schizophrenia**

#### 46 WHO-5

47 WHO-5 is used to measure subjective quality of life based on positive mood (good  
48 spirits and relaxation), vitality (being active and waking up fresh and rested), and  
49 general interest (being interested in things). WHO-5 comprises five items rated on a six-  
50 point Likert scale. Higher scores mean higher well-being. The Japanese version of  
51 WHO-5 has adequate internal consistency. It was also confirmed to have external  
52 concurrent validity and external discriminatory validity.<sup>32</sup>  
53  
54  
55  
56  
57

#### 58 Hospitalisation by 6-month follow-up

1  
2  
3  
4  
5  
6 This is a question with a dichotomous answer (yes or no) about whether the patient has  
7 been hospitalised during the past 6 months. The answer will be provided by the  
8 caregiver at baseline and the 6-month follow-up.  
9

### 10 11 **Sample size calculation**

12 The sample size required was calculated according to guidelines in the Consolidated  
13 Standards of Reporting Trials (CONSORT) for cRCTs,<sup>35</sup> taking into account intra-class  
14 correlations (ICCs). The effect size of a brief FPE program for individual caregiver  
15 burden was estimated based on a previous pre-post test.<sup>19</sup> The pre-post test concluded  
16 that the standardised mean difference (d) of brief FPE on family burden was 0.46.  
17 Sample size was estimated as 76 in each arm based on an alpha error probability of 0.05  
18 and power (1- $\beta$ ) of 0.80, using G\*Power version 3.1.9.2.<sup>36 37</sup> cRCT should be multiplied  
19 by design effect (1+[m-1] $\rho$ ), where m is the average cluster size and  $\rho$  is the ICC.<sup>38</sup> The  
20 estimated ICC for the primary outcome in this study was set to 0.05 and the average  
21 number of caregivers per cluster was set at five people. Assuming an attrition rate of  
22 20%, the required sample size was 110 caregivers in each arm; thus, at least 44 visiting  
23 nurse stations will be recruited.  
24  
25  
26  
27  
28  
29  
30  
31

### 32 **Randomisation**

33 Visiting nurse agencies that meet the inclusion criteria will be randomised to the  
34 intervention group (brief FPE program) or the control (TAU) group. Randomisation will  
35 be stratified by the median of the average caseload of visiting nurses in each agency  
36 since the effect of the intervention might differ based on this factor. If a visiting nurse  
37 has a large number of patients, it is expected that family support will be neglected. A  
38 random sequence table will be created by a researcher (HT) in an independent  
39 department of our institution who was not involved in the study protocol development  
40 process. In addition, another independent researcher (SY) who is not involved in  
41 intervention and analysis will conduct the randomisation. SY will inform each visiting  
42 nurse agency of the randomisation results. The primary investigator (NY) will be  
43 blinded through the entire randomisation process.  
44  
45  
46  
47  
48  
49  
50  
51

### 52 **Statistical analysis**

53 The statistician will be blinded to the treatment group. We will analyse clinical  
54 outcomes on the basis of intention to treat and model the effect of the intervention on  
55 primary and secondary continuous outcomes using generalised linear latent and mixed  
56 models (GLLAMMs). This will allow for missing data to be taken into account within  
57  
58  
59  
60



1  
2  
3  
4  
5  
6 the statistical model. In this study, a three-level model will be used, with repeated  
7 measures nested in participants and participants nested in clusters. Time (baseline, 1-  
8 month follow-up, 6-month follow-up) will be considered level 1, individual caregivers  
9 will be considered level 2, and clusters (visiting nurse stations) will be considered level  
10 3. Regarding fixed effects, condition (intervention versus control), time, and a two-way  
11 interaction effect, condition by time, will be included. Models will adjust for baseline  
12 differences in caregiver socio-demographics such as age, gender, education, household  
13 income, family relationship with the person with schizophrenia, length of caregiving,  
14 and length of visiting nurse system use. Multiple levels of Cox proportional hazards  
15 regression models will also be used for the dichotomous question of hospitalisation at  
16 the 6-month follow-up. A *p*-value of less than 0.05 will be considered statistically  
17 significant.  
18  
19  
20  
21  
22  
23  
24

### 25 **Data monitoring**

26 A data monitoring committee (DMC) will be set up. It will consist of at least two  
27 independent members. The DMC will meet monthly after the first participant is  
28 randomised. The purpose of the meeting will be to review participation rates and  
29 reasons for study dropout. The DMC will be independent from any sponsor and  
30 competing interest.  
31  
32  
33  
34  
35

### 36 **Patient and public involvement**

37 The research question, study design, and outcome measures were determined based on a  
38 discussion with representatives of the Family Association of Schizophrenia. This  
39 intervention program was also developed through the discussion and collaboration  
40 among members of the Family Association of Schizophrenia, psychiatric visiting  
41 nurses, FPE experts, psychiatrists, psychiatric nurses, clinical psychologists, and mental  
42 health social workers. After the completion of the study, this intervention tool will be  
43 available for anyone who wants to use it via the internet.  
44  
45  
46  
47  
48

### 49 **Ethics and dissemination**

50 Ethical considerations

51 The authors assert that all procedures contributing to this work comply with the ethical  
52 standards of the relevant national and institutional committees on human experimentation  
53 and with the Helsinki Declaration of 1975, as revised in 2008. The study protocol was  
54 approved by the Research Ethics Committee of the Graduate School of Medicine and the  
55 Faculty of Medicine at the University of Tokyo, Japan (No. 2019065NI). We will obtain  
56  
57  
58  
59  
60

1  
2  
3  
4  
5  
6 informed consent from all caregivers and patients. The consent form will inform  
7 caregivers and patients that we guarantee protection of personal information and that the  
8 data will be anonymous and used only for academic purposes. There are no competing  
9 interests. This study is supported by fundamental study on effective community services  
10 for people with severe mental disorders and their families.  
11  
12

### 13 14 15 **Dissemination of the research findings**

16 The findings will be published in a scientific peer-reviewed journal according to the  
17 CONSORT guidelines for cRCTs.<sup>35</sup> The participants will be informed of conference  
18 presentations and publications.  
19  
20

### 21 22 **Strengths and limitations**

23 The study has both strengths and limitations. First, the study will evaluate an  
24 implementable brief FPE program that potentially reduces time, cost, and staffing  
25 problems by incorporating the program into an existing mental health service system,  
26 namely visiting nurse services. Second, this is the first cRCT of a brief FPE program, a  
27 trial with a better study design. It will provide better evidence than past studies. Third,  
28 based on the concept of coproduction and PPI,<sup>25</sup> the study was developed with  
29 incorporation of a variety of views from caregivers, visiting nurses, and FPE experts.  
30  
31

32 We recognise three limitations of this study. First, since the sampling method for  
33 participating agencies was not random, there is a possibility of selection bias. Second,  
34 since subjects provide data through a self-reported questionnaire, information bias or  
35 random error is possible. Third, each visiting nurse may not be able to complete all four  
36 sessions using the tool in the actual clinical setting, leading to the possibility of a high  
37 attrition rate during implementation.  
38  
39  
40  
41  
42  
43

### 44 45 **Acknowledgments**

46 The authors would like to thank the members of the *Mokuseikai* Family Association of  
47 Schizophrenia for their invaluable advice on many aspects of the project.  
48  
49

### 50 51 **Contributors**

52 NY is the principal investigator responsible for the initial draft of this manuscript and  
53 organising and implementing the study. NY and KW calculated the sample size. NY,  
54 KW, SY, and MA decided on the analytic strategy. All authors contributed to the  
55 development of the intervention and study design. All authors have read and approved  
56 the final manuscript.  
57  
58  
59  
60



1  
2  
3  
4  
5  
6 **Funding:** This work is supported by Fundamental study on effective community  
7 services for people with severe mental disorders and their families.  
8  
9

10 **Competing interests:** None declared.  
11  
12

13 **Patient Consent:** Obtained.  
14  
15

16 **Ethics approval:** Research Committee of the Graduate School of Medicine and the  
17 Faculty of Medicine at the University of Tokyo, Japan.  
18  
19  
20  
21  
22  
23  
24  
25  
26  
27  
28  
29  
30  
31  
32  
33  
34  
35  
36  
37  
38  
39  
40  
41  
42  
43  
44  
45  
46  
47  
48  
49  
50  
51  
52  
53  
54  
55  
56  
57  
58  
59  
60

**REFERENCES**

1. Awad AG, Voruganti LN. The burden of schizophrenia on caregivers: a review. *Pharmacoecon Open* 2008;26:149–62. doi:10.2165/00019053-200826020-00005
2. Saunders JC. Families living with severe mental illness: a literature review. *Issues Ment Health Nurs* 2003;24:175–98. doi:10.1080/01612840305301
3. Shah AJ, Wadoo O, Latoo J. Psychological distress in carers of people with mental disorders. *British Journal of Medical Practitioners* 2010;3:a327.
4. Gopinath PA, Chaturvedi S. Distress behaviour of schizophrenics at home. *Acta Psychiatr Scand* 1992;86:185–8. doi:10.1111/j.1600-0447.1992.tb03249.x
5. McAuliffe R, O'Connor L, Meagher D. Parents' experience of living with and caring for an adult son or daughter with schizophrenia at home in Ireland: a qualitative study. *J Psychiatr Ment Health Nurs* 2014;21:145–53. doi:10.1111/jpm.12065
6. Sin J, Gillard S, Spain D, *et al.* Effectiveness of psychoeducational interventions for family carers of people with psychosis: a systematic review and meta-analysis. *Clin Psychol Rev* 2017;56:13–24. doi:10.1016/j.cpr.2017.05.002
7. Sin J, Jordan CD, Barley EA, *et al.* Psychoeducation for siblings of people with severe mental illness. *Cochrane Database Syst Rev* 2015;5:Cd010540. doi:10.1002/14651858.CD010540.pub2
8. Dixon L, McFarlane WR, Lefley H, *et al.* Evidence-based practices for services to families of people with psychiatric disabilities. *Psychiatr Serv* 2001;52:903–10. doi:10.1176/appi.ps.52.7.903
9. Birchwood M, Smith J, Cochrane R. Specific and non-specific effects of educational intervention for families living with schizophrenia. A comparison of three methods. *Br J Psychiatry* 1992;160:806–14. doi:10.1192/bjp.160.6.806
10. Lehman AF, Steinwachs DM. Patterns of usual care for schizophrenia: initial results from the Schizophrenia Patient Outcomes Research Team (PORT) Client Survey.

1  
2  
3  
4  
5  
6  
7  
8  
9  
10  
11  
12  
13  
14  
15  
16  
17  
18  
19  
20  
21  
22  
23  
24  
25  
26  
27  
28  
29  
30  
31  
32  
33  
34  
35  
36  
37  
38  
39  
40  
41  
42  
43  
44  
45  
46  
47  
48  
49  
50  
51  
52  
53  
54  
55  
56  
57  
58  
59  
60

*Schizophr Bull* 1998;24:11–20; discussion 20–32.

doi:10.1093/oxfordjournals.schbul.a033303

11. Oshima I, Mino Y, Nakamura Y, *et al.* Implementation and dissemination of family psychoeducation in Japan: nationwide survey on psychiatric hospitals in 1995 and 2001. *Journal of Social Policy & Social Work* 2007;11:5–16.
12. Rummel-Kluge C, Kissling W. Psychoeducation in schizophrenia: new developments and approaches in the field. *Curr Opin Psychiatry* 2008;21:168–72. doi:10.1097/YCO.0b013e3282f4e574
13. Harvey C. Family psychoeducation for people living with schizophrenia and their families. *BJPsych Adv* 2018;24:9–19. doi:10.1192/bja.2017.4
14. Fadden G, Heelis R. 2011. The Meriden Family Programme: lessons learned over 10 years. *J Ment Health* 2011;20:79–88. doi:10.3109/09638237.2010.492413 [published online first: 2 September 2010].
15. McFarlane WR, Dixon L, Lukens E, *et al.* Family psychoeducation and schizophrenia: a review of the literature. *J Marital Fam Ther* 2003;29:223–45.
16. Okpokoro U, Adams CE, Sampson S. Family intervention (brief) for schizophrenia. *Cochrane Database Syst Rev* 2014;3:CD009802. doi:10.1002/14651858.CD009802.pub2
17. Pitschel-Walz G, Leucht S, Bauml J, *et al.* The effect of family interventions on relapse and rehospitalization in schizophrenia—a meta-analysis. *Schizophr Bull* 2001;27:73–92. doi:10.1093/oxfordjournals.schbul.a006861.
18. Smith JV, Birchwood MJ. Specific and non-specific effects of educational intervention with families living with a schizophrenic relative. *Br J Psychiatry* 1987;150:645–52. doi:10.1192/bjp.150.5.645.
19. Devaramane V, Pai NB, Vella SL. The effect of a brief family intervention on primary carer's functioning and their schizophrenic relatives levels of

- 1  
2  
3  
4  
5  
6 psychopathology in India. *Asian J Psychiatr* 2011;4:183–7.  
7 doi:10.1016/j.ajp.2011.06.004  
8  
9
- 10 20. Sharif F, Shaygan M, Mani A. Effect of a psycho-educational intervention for  
11 family members on caregiver burdens and psychiatric symptoms in patients with  
12 schizophrenia in Shiraz, Iran. *BMC Psychiatry* 2012;12:48. doi:10.1186/1471-244x-  
13 12-48  
14  
15
- 16 21. Huang XY, Ma WF, Shih HH, *et al.* Roles and functions of community mental  
17 health nurses caring for people with schizophrenia in Taiwan. *J Clin Nurs*  
18 2008;17:3030–40. doi:10.1111/j.1365-2702.2008.02426.x  
19  
20  
21  
22
- 23 22. Setoya N, Kayama M, Tsunoda A, *et al.* A survey of the family care provided in  
24 psychiatric home-visit nursing and related characteristics of clients. *Japanese*  
25 *Bulletin of Social Psychiatry* 2011;20:17–25.  
26  
27  
28
- 29 23. Chan AW, Tetzlaff JM, Altman DG, *et al.* SPIRIT 2013 statement: defining  
30 standard protocol items for clinical trials. *Ann Intern Med* 2013;158:200–7.  
31 doi:10.7326/0003-4819-158-3-201302050-00583  
32  
33  
34
- 35 24. Varghese M, Shah A, Kumar GSU, *et al.* Family intervention and support in  
36 schizophrenia: a manual on family intervention for the mental health professional,  
37 version 2. Bangalore, India: National Institute of Mental Health and Neurosciences.  
38  
39  
40
- 41 25. Batalden M, Batalden P, Margolis P, *et al.* Coproduction of healthcare service. *BMJ*  
42 *Qual Safe* 2016;25:509–17. doi:10.1136/bmjqs-2015-004315  
43  
44  
45
- 46 26. Ferriter M, Huband N. Experiences of parents with a son or daughter suffering from  
47 schizophrenia. *J Psychiatr Ment Health Nurs* 2003;10:552–60. doi:10.1046/j.1365-  
48 2850.2003.00624.x  
49  
50
- 51 27. Menezes NM, Arenovich T, Zipursky RB. A systematic review of longitudinal  
52 outcome studies of first-episode psychosis. *Psychol Med* 2006;36:1349–62.  
53 doi:10.1017/s0033291706007951  
54  
55  
56  
57  
58  
59  
60

- 1  
2  
3  
4  
5  
6 28. Amaresha AC, Venkatasubramanian G. Expressed emotion in schizophrenia: an  
7 overview. *Indian J Psychol Med* 2012;34:12–20. doi:10.4103/0253-7176.96149  
8  
9  
10 29. Arai Y, Kudo K, Hosokawa T, *et al.* Reliability and validity of the Japanese version  
11 of the Zarit Caregiver Burden interview. *Psychiatry Clin Neurosci* 1997;51:281–7.  
12 doi:10.1111/j.1440-1819.1997.tb03199.x  
13  
14  
15 30. Sakurai K, Nishi A, Kondo K, *et al.* Screening performance of K6/K10 and other  
16 screening instruments for mood and anxiety disorders in Japan. *Psychiatry Clin*  
17 *Neurosci* 2011;65:434–41. doi:10.1111/j.1440-1819.2011.02236.x  
18  
19  
20 31. Sakano Y, Tohjoh M. The General Self-Efficacy Scale (GSES): scale development  
21 and validation. *Japanese Journal of Behavior Therapy* 1986;12:73–82.  
22  
23  
24 32. Awata S, Bech P, Yoshida S, *et al.* Reliability and validity of the Japanese version  
25 of the World Health Organization-Five Well-Being Index in the context of detecting  
26 depression in diabetic patients. *Psychiatry Clin Neurosci* 2007;61:112–9.  
27 doi:10.1111/j.1440-1819.2007.01619.x  
28  
29  
30 33. Maeda M, OM, Renri T, *et al.* It is as a result of disease drug knowledge degree  
31 investigation (Knowledge of Illness and Drugs Inventory, KIDI) for a person with  
32 IIB-29 schizophrenia and the family. *Japanese Bulletin of Social Psychiatry*  
33 1994;2:173–4.  
34  
35  
36 34. Setoya Y, N. Y., Kurita H. Utility of the Japanese version of the BASIS-32 in  
37 inpatients in psychiatric hospital. *Japanese Journal of Clinical Psychiatry*  
38 2002;31:571–5.  
39  
40  
41 35. Campbell MK, Piaggio G, Elbourne DR, *et al.* Consort 2010 statement: extension to  
42 cluster randomised trials. *BMJ* 2012;345:e5661. doi:10.1136/bmj.e5661  
43  
44  
45 36. Faul F, Erdfelder E, Buchner A, *et al.* Statistical power analyses using G\*Power 3.1:  
46 tests for correlation and regression analyses. *Behav Res Methods* 2009;41:1149–60.  
47 doi:10.3758/brm.41.4.1149  
48  
49  
50  
51  
52  
53  
54  
55  
56  
57  
58  
59  
60

- 1  
2  
3  
4  
5  
6 37. Faul F, Erdfelder E, Lang AG, *et al.* G\*Power 3: a flexible statistical power analysis  
7 program for the social, behavioral, and biomedical sciences. *Behav Res Methods*  
8 2007;39:175–91.  
9  
10  
11 38. Campbell MK, Elbourne DR, Altman DG. CONSORT statement: extension to  
12 cluster randomised trials. *BMJ* 2004;328:702–8. doi:10.1136/bmj.328.7441.702  
13  
14  
15  
16  
17  
18  
19  
20  
21  
22  
23  
24  
25  
26  
27  
28  
29  
30  
31  
32  
33  
34  
35  
36  
37  
38  
39  
40  
41  
42  
43  
44  
45  
46  
47  
48  
49  
50  
51  
52  
53  
54  
55  
56  
57  
58  
59  
60

For peer review only

**Table 1. Outline of the brief family psychoeducation program**

| Session number | Session aim                                                             | Contents                                                                                                                                                                                                                                                                                                                                                                                                                                                                                             |
|----------------|-------------------------------------------------------------------------|------------------------------------------------------------------------------------------------------------------------------------------------------------------------------------------------------------------------------------------------------------------------------------------------------------------------------------------------------------------------------------------------------------------------------------------------------------------------------------------------------|
| I              | General knowledge about schizophrenia                                   | Definition, causes, symptoms, prognosis, pharmacological treatment, psychosocial rehabilitation.<br>Work: Let's review the knowledge gained in this session.                                                                                                                                                                                                                                                                                                                                         |
| II             | How to cope with people with schizophrenia using problem-solving skills | How to cope with hallucinations and delusions; signs of recurrence and how to prevent recurrence; how to cope when the disease gets worse; what to do with people with schizophrenia when they stay at home all day; how to respond to people with schizophrenia who do not want to take their medication; what to do when domestic violence is imminent, is happening, or has happened; how to get involved when self-injury or suicide is suspected.<br>Work: How to apply problem-solving skills. |
| III            | Handling communication and emotions                                     | Understanding the feelings of people with schizophrenia, expressed emotion (EE) theory, basic knowledge about communication, and a lecture about desirable and undesirable communication with people with schizophrenia.<br>Work: Let's practice conversations using real cases.                                                                                                                                                                                                                     |
| IV             | Family's recovery                                                       | Thinking about the family's recovery, importance of living one's own life, taking care of a family's physical and mental health needs, proper stress management, experiences and messages from members of the Family Association.<br>Work: Let's identify social resources in the community and recognise the importance of connecting with many supporters around families.                                                                                                                         |

This intervention program consists of four 60-minute modules completed over the period of 1 month.

**Table 2. Outcome measures**

|                           | Outcome measure                                       | Baseline | 1-month follow-up | 6-month follow-up |
|---------------------------|-------------------------------------------------------|----------|-------------------|-------------------|
| Caregivers                | Zarit Burden Interview (ZBI)                          | ✓        | ✓                 | ✓                 |
|                           | K6                                                    | ✓        | ✓                 | ✓                 |
|                           | General Self-Efficacy Scale (GSES)                    | ✓        | ✓                 | ✓                 |
|                           | WHO-5                                                 | ✓        | ✓                 | ✓                 |
|                           | Knowledge of Illness and Drug Inventory (KIDI)        | ✓        | ✓                 | ✓                 |
| People with schizophrenia | Behavior and Symptoms Identification Scale (BASIS-32) | ✓        | ✓                 | ✓                 |
|                           | WHO-5                                                 | ✓        | ✓                 | ✓                 |
|                           | Hospitalisation during the past 6 months              | ✓        | –                 | ✓                 |



**Figure 1. Participant flow chart**

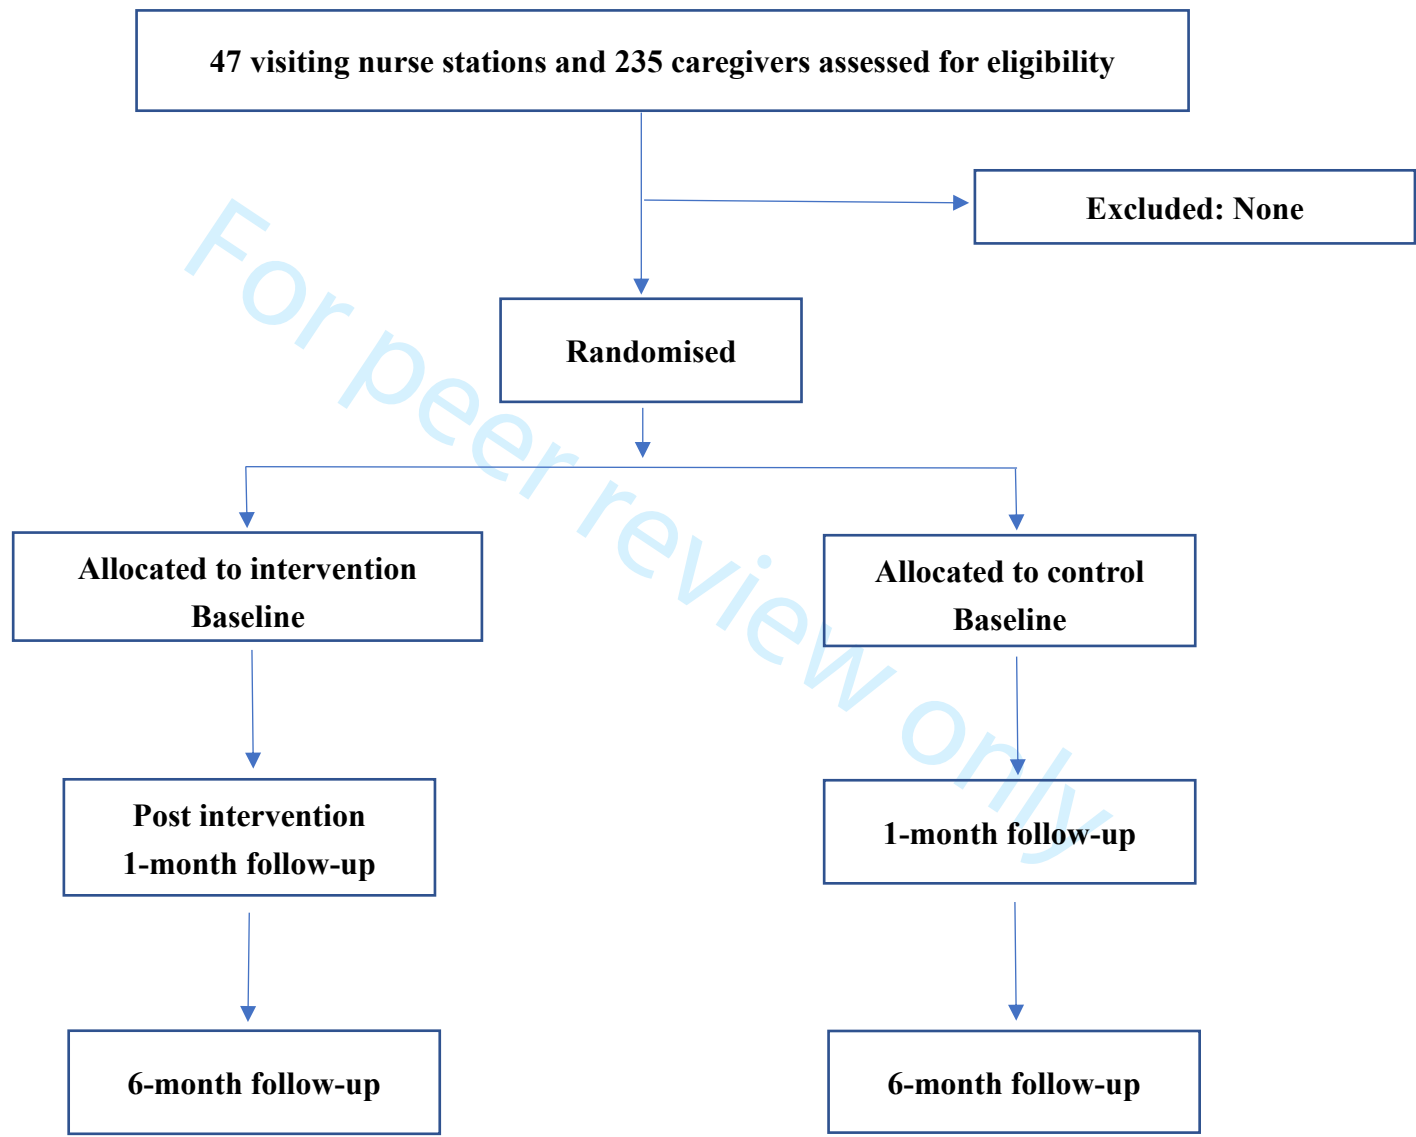

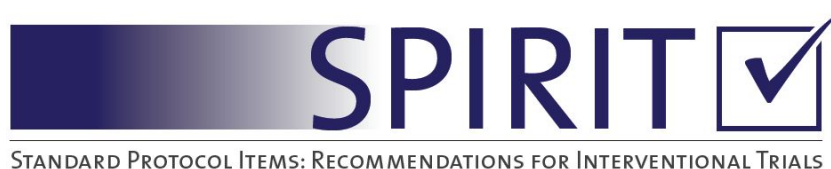

SPIRIT 2013 Checklist: Recommended items to address in a clinical trial protocol and related documents\*

| Section/item                      | ItemNo | Description                                                                                                                                                                                                                                                                              |      |
|-----------------------------------|--------|------------------------------------------------------------------------------------------------------------------------------------------------------------------------------------------------------------------------------------------------------------------------------------------|------|
| <b>Administrative information</b> |        |                                                                                                                                                                                                                                                                                          |      |
| Title                             | 1      | Descriptive title identifying the study design, population, interventions, and, if applicable, trial acronym                                                                                                                                                                             | P1   |
| Trial registration                | 2a     | Trial identifier and registry name. If not yet registered, name of intended registry                                                                                                                                                                                                     | P2   |
|                                   | 2b     | All items from the World Health Organization Trial Registration Data Set                                                                                                                                                                                                                 | NA   |
| Protocol version                  | 3      | Date and version identifier                                                                                                                                                                                                                                                              | NA   |
| Funding                           | 4      | Sources and types of financial, material, and other support                                                                                                                                                                                                                              | P13  |
| Roles and responsibilities        | 5a     | Names, affiliations, and roles of protocol contributors                                                                                                                                                                                                                                  | P1   |
|                                   | 5b     | Name and contact information for the trial sponsor                                                                                                                                                                                                                                       | NA   |
|                                   | 5c     | Role of study sponsor and funders, if any, in study design; collection, management, analysis, and interpretation of data; writing of the report; and the decision to submit the report for publication, including whether they will have ultimate authority over any of these activities | NA   |
|                                   | 5d     | Composition, roles, and responsibilities of the coordinating centre, steering committee, endpoint adjudication committee, data management team, and other individuals or groups overseeing the trial, if applicable (see Item 21a for data monitoring committee)                         | NA   |
| <b>Introduction</b>               |        |                                                                                                                                                                                                                                                                                          |      |
| Background and rationale          | 6a     | Description of research question and justification for undertaking the trial, including summary of relevant studies (published and unpublished) examining benefits and harms for each intervention                                                                                       | P3-5 |
|                                   | 6b     | Explanation for choice of comparators                                                                                                                                                                                                                                                    | P3-5 |

|    |                                                           |     |                                                            |       |
|----|-----------------------------------------------------------|-----|------------------------------------------------------------|-------|
| 1  |                                                           |     |                                                            |       |
| 2  | Objectives                                                | 7   | Specific objectives or hypotheses                          | P5    |
| 3  |                                                           |     |                                                            |       |
| 4  | Trial design                                              | 8   | Description of trial design including type of trial (eg,   | P5    |
| 5  |                                                           |     | parallel group, crossover, factorial, single group),       |       |
| 6  |                                                           |     | allocation ratio, and framework (eg, superiority,          |       |
| 7  |                                                           |     | equivalence, noninferiority, exploratory)                  |       |
| 8  |                                                           |     |                                                            |       |
| 9  |                                                           |     |                                                            |       |
| 10 | <b>Methods: Participants, interventions, and outcomes</b> |     |                                                            |       |
| 11 |                                                           |     |                                                            |       |
| 12 | Study setting                                             | 9   | Description of study settings (eg, community clinic,       | P5-6  |
| 13 |                                                           |     | academic hospital) and list of countries where data will   |       |
| 14 |                                                           |     | be collected. Reference to where list of study sites can   |       |
| 15 |                                                           |     | be obtained                                                |       |
| 16 |                                                           |     |                                                            |       |
| 17 | Eligibility criteria                                      | 10  | Inclusion and exclusion criteria for participants. If      | P5-6  |
| 18 |                                                           |     | applicable, eligibility criteria for study centres and     |       |
| 19 |                                                           |     | individuals who will perform the interventions (eg,        |       |
| 20 |                                                           |     | surgeons, psychotherapists)                                |       |
| 21 |                                                           |     |                                                            |       |
| 22 |                                                           |     |                                                            |       |
| 23 | Interventions                                             | 11a | Interventions for each group with sufficient detail to     | P6-8  |
| 24 |                                                           |     | allow replication, including how and when they will be     |       |
| 25 |                                                           |     | administered                                               |       |
| 26 |                                                           |     |                                                            |       |
| 27 |                                                           |     |                                                            |       |
| 28 |                                                           | 11b | Criteria for discontinuing or modifying allocated          | P6-8  |
| 29 |                                                           |     | interventions for a given trial participant (eg, drug dose |       |
| 30 |                                                           |     | change in response to harms, participant request, or       |       |
| 31 |                                                           |     | improving/worsening disease)                               |       |
| 32 |                                                           |     |                                                            |       |
| 33 |                                                           | 11c | Strategies to improve adherence to intervention            | P6-8  |
| 34 |                                                           |     | protocols, and any procedures for monitoring               |       |
| 35 |                                                           |     | adherence (eg, drug tablet return, laboratory tests)       |       |
| 36 |                                                           |     |                                                            |       |
| 37 |                                                           |     |                                                            |       |
| 38 |                                                           | 11d | Relevant concomitant care and interventions that are       | P6-8  |
| 39 |                                                           |     | permitted or prohibited during the trial                   |       |
| 40 |                                                           |     |                                                            |       |
| 41 | Outcomes                                                  | 12  | Primary, secondary, and other outcomes, including the      | P9-10 |
| 42 |                                                           |     | specific measurement variable (eg, systolic blood          |       |
| 43 |                                                           |     | pressure), analysis metric (eg, change from baseline,      |       |
| 44 |                                                           |     | final value, time to event), method of aggregation (eg,    |       |
| 45 |                                                           |     | median, proportion), and time point for each outcome.      |       |
| 46 |                                                           |     | Explanation of the clinical relevance of chosen efficacy   |       |
| 47 |                                                           |     | and harm outcomes is strongly recommended                  |       |
| 48 |                                                           |     |                                                            |       |
| 49 |                                                           |     |                                                            |       |
| 50 | Participant                                               | 13  | Time schedule of enrolment, interventions (including       | P5-6  |
| 51 | timeline                                                  |     | any run-ins and washouts), assessments, and visits for     |       |
| 52 |                                                           |     | participants. A schematic diagram is highly                |       |
| 53 |                                                           |     | recommended (see Figure)                                   |       |
| 54 |                                                           |     |                                                            |       |
| 55 |                                                           |     |                                                            |       |
| 56 |                                                           |     |                                                            |       |
| 57 |                                                           |     |                                                            |       |
| 58 |                                                           |     |                                                            |       |
| 59 |                                                           |     |                                                            |       |
| 60 |                                                           |     |                                                            |       |

|   |             |    |                                                         |        |
|---|-------------|----|---------------------------------------------------------|--------|
| 1 |             |    |                                                         |        |
| 2 | Sample size | 14 | Estimated number of participants needed to achieve      | P10-11 |
| 3 |             |    | study objectives and how it was determined, including   |        |
| 4 |             |    | clinical and statistical assumptions supporting any     |        |
| 5 |             |    | sample size calculations                                |        |
| 6 |             |    |                                                         |        |
| 7 | Recruitment | 15 | Strategies for achieving adequate participant enrolment | P5-6   |
| 8 |             |    | to reach target sample size                             |        |
| 9 |             |    |                                                         |        |

### Methods: Assignment of interventions (for controlled trials)

#### Allocation:

|    |                |     |                                                           |     |
|----|----------------|-----|-----------------------------------------------------------|-----|
| 14 | Sequence       | 16a | Method of generating the allocation sequence (eg,         | P11 |
| 15 | generation     |     | computer-generated random numbers), and list of any       |     |
| 16 |                |     | factors for stratification. To reduce predictability of a |     |
| 17 |                |     | random sequence, details of any planned restriction       |     |
| 18 |                |     | (eg, blocking) should be provided in a separate           |     |
| 19 |                |     | document that is unavailable to those who enrol           |     |
| 20 |                |     | participants or assign interventions                      |     |
| 21 |                |     |                                                           |     |
| 22 |                |     |                                                           |     |
| 23 |                |     |                                                           |     |
| 24 | Allocation     | 16b | Mechanism of implementing the allocation sequence         | P11 |
| 25 | concealment    |     | (eg, central telephone; sequentially numbered, opaque,    |     |
| 26 | mechanism      |     | sealed envelopes), describing any steps to conceal the    |     |
| 27 |                |     | sequence until interventions are assigned                 |     |
| 28 |                |     |                                                           |     |
| 29 |                |     |                                                           |     |
| 30 | Implementation | 16c | Who will generate the allocation sequence, who will       | P11 |
| 31 |                |     | enrol participants, and who will assign participants to   |     |
| 32 |                |     | interventions                                             |     |
| 33 |                |     |                                                           |     |
| 34 | Blinding       | 17a | Who will be blinded after assignment to interventions     | P11 |
| 35 | (masking)      |     | (eg, trial participants, care providers, outcome          |     |
| 36 |                |     | assessors, data analysts), and how                        |     |
| 37 |                |     |                                                           |     |
| 38 |                |     |                                                           |     |
| 39 |                | 17b | If blinded, circumstances under which unblinding is       | P11 |
| 40 |                |     | permissible, and procedure for revealing a participant's  |     |
| 41 |                |     | allocated intervention during the trial                   |     |
| 42 |                |     |                                                           |     |

### Methods: Data collection, management, and analysis

|    |                 |     |                                                             |        |
|----|-----------------|-----|-------------------------------------------------------------|--------|
| 45 | Data collection | 18a | Plans for assessment and collection of outcome,             | P11-12 |
| 46 | methods         |     | baseline, and other trial data, including any related       |        |
| 47 |                 |     | processes to promote data quality (eg, duplicate            |        |
| 48 |                 |     | measurements, training of assessors) and a description      |        |
| 49 |                 |     | of study instruments (eg, questionnaires, laboratory        |        |
| 50 |                 |     | tests) along with their reliability and validity, if known. |        |
| 51 |                 |     | Reference to where data collection forms can be found,      |        |
| 52 |                 |     | if not in the protocol                                      |        |
| 53 |                 |     |                                                             |        |
| 54 |                 |     |                                                             |        |
| 55 |                 |     |                                                             |        |
| 56 |                 | 18b | Plans to promote participant retention and complete         | P11-12 |
| 57 |                 |     | follow-up, including list of any outcome data to be         |        |
| 58 |                 |     | collected for participants who discontinue or deviate       |        |
| 59 |                 |     | from intervention protocols                                 |        |
| 60 |                 |     |                                                             |        |

|    |                                 |     |                                                              |        |
|----|---------------------------------|-----|--------------------------------------------------------------|--------|
| 1  |                                 |     |                                                              |        |
| 2  | Data                            | 19  | Plans for data entry, coding, security, and storage,         | P12    |
| 3  | management                      |     | including any related processes to promote data quality      |        |
| 4  |                                 |     | (eg, double data entry; range checks for data values).       |        |
| 5  |                                 |     | Reference to where details of data management                |        |
| 6  |                                 |     | procedures can be found, if not in the protocol              |        |
| 7  |                                 |     |                                                              |        |
| 8  |                                 |     |                                                              |        |
| 9  | Statistical                     | 20a | Statistical methods for analysing primary and                | P11-12 |
| 10 | methods                         |     | secondary outcomes. Reference to where other details         |        |
| 11 |                                 |     | of the statistical analysis plan can be found, if not in the |        |
| 12 |                                 |     | protocol                                                     |        |
| 13 |                                 |     |                                                              |        |
| 14 |                                 | 20b | Methods for any additional analyses (eg, subgroup and        | P11-12 |
| 15 |                                 |     | adjusted analyses)                                           |        |
| 16 |                                 |     |                                                              |        |
| 17 |                                 | 20c | Definition of analysis population relating to protocol       | P11-12 |
| 18 |                                 |     | non-adherence (eg, as randomised analysis), and any          |        |
| 19 |                                 |     | statistical methods to handle missing data (eg, multiple     |        |
| 20 |                                 |     | imputation)                                                  |        |
| 21 |                                 |     |                                                              |        |
| 22 |                                 |     |                                                              |        |
| 23 | <b>Methods: Monitoring</b>      |     |                                                              |        |
| 24 |                                 |     |                                                              |        |
| 25 | Data monitoring                 | 21a | Composition of data monitoring committee (DMC);              | P12    |
| 26 |                                 |     | summary of its role and reporting structure; statement       |        |
| 27 |                                 |     | of whether it is independent from the sponsor and            |        |
| 28 |                                 |     | competing interests; and reference to where further          |        |
| 29 |                                 |     | details about its charter can be found, if not in the        |        |
| 30 |                                 |     | protocol. Alternatively, an explanation of why a DMC is      |        |
| 31 |                                 |     | not needed                                                   |        |
| 32 |                                 |     |                                                              |        |
| 33 |                                 |     |                                                              |        |
| 34 |                                 | 21b | Description of any interim analyses and stopping             | NA     |
| 35 |                                 |     | guidelines, including who will have access to these          |        |
| 36 |                                 |     | interim results and make the final decision to terminate     |        |
| 37 |                                 |     | the trial                                                    |        |
| 38 |                                 |     |                                                              |        |
| 39 |                                 |     |                                                              |        |
| 40 | Harms                           | 22  | Plans for collecting, assessing, reporting, and              | NA     |
| 41 |                                 |     | managing solicited and spontaneously reported                |        |
| 42 |                                 |     | adverse events and other unintended effects of trial         |        |
| 43 |                                 |     | interventions or trial conduct                               |        |
| 44 |                                 |     |                                                              |        |
| 45 |                                 |     |                                                              |        |
| 46 | Auditing                        | 23  | Frequency and procedures for auditing trial conduct, if      | NA     |
| 47 |                                 |     | any, and whether the process will be independent from        |        |
| 48 |                                 |     | investigators and the sponsor                                |        |
| 49 |                                 |     |                                                              |        |
| 50 |                                 |     |                                                              |        |
| 51 | <b>Ethics and dissemination</b> |     |                                                              |        |
| 52 |                                 |     |                                                              |        |
| 53 | Research ethics                 | 24  | Plans for seeking research ethics                            | P12    |
| 54 | approval                        |     | committee/institutional review board (REC/IRB)               |        |
| 55 |                                 |     | approval                                                     |        |
| 56 |                                 |     |                                                              |        |
| 57 |                                 |     |                                                              |        |
| 58 |                                 |     |                                                              |        |
| 59 |                                 |     |                                                              |        |
| 60 |                                 |     |                                                              |        |

|    |                   |     |                                                            |      |
|----|-------------------|-----|------------------------------------------------------------|------|
| 1  |                   |     |                                                            |      |
| 2  | Protocol          | 25  | Plans for communicating important protocol                 | NA   |
| 3  | amendments        |     | modifications (eg, changes to eligibility criteria,        |      |
| 4  |                   |     | outcomes, analyses) to relevant parties (eg,               |      |
| 5  |                   |     | investigators, REC/IRBs, trial participants, trial         |      |
| 6  |                   |     | registries, journals, regulators)                          |      |
| 7  |                   |     |                                                            |      |
| 8  |                   |     |                                                            |      |
| 9  | Consent or        | 26a | Who will obtain informed consent or assent from            | P5-6 |
| 10 | assent            |     | potential trial participants or authorised surrogates, and |      |
| 11 |                   |     | how (see Item 32)                                          |      |
| 12 |                   |     |                                                            |      |
| 13 |                   | 26b | Additional consent provisions for collection and use of    | NA   |
| 14 |                   |     | participant data and biological specimens in ancillary     |      |
| 15 |                   |     | studies, if applicable                                     |      |
| 16 |                   |     |                                                            |      |
| 17 | Confidentiality   | 27  | How personal information about potential and enrolled      | P12  |
| 18 |                   |     | participants will be collected, shared, and maintained in  |      |
| 19 |                   |     | order to protect confidentiality before, during, and after |      |
| 20 |                   |     | the trial                                                  |      |
| 21 |                   |     |                                                            |      |
| 22 |                   |     |                                                            |      |
| 23 | Declaration of    | 28  | Financial and other competing interests for principal      | P13  |
| 24 | interests         |     | investigators for the overall trial and each study site    |      |
| 25 |                   |     |                                                            |      |
| 26 | Access to data    | 29  | Statement of who will have access to the final trial       | P12  |
| 27 |                   |     | dataset, and disclosure of contractual agreements that     |      |
| 28 |                   |     | limit such access for investigators                        |      |
| 29 |                   |     |                                                            |      |
| 30 |                   |     |                                                            |      |
| 31 | Ancillary and     | 30  | Provisions, if any, for ancillary and post-trial care, and | NA   |
| 32 | post-trial care   |     | for compensation to those who suffer harm from trial       |      |
| 33 |                   |     | participation                                              |      |
| 34 |                   |     |                                                            |      |
| 35 | Dissemination     | 31a | Plans for investigators and sponsor to communicate         | P13  |
| 36 | policy            |     | trial results to participants, healthcare professionals,   |      |
| 37 |                   |     | the public, and other relevant groups (eg, via             |      |
| 38 |                   |     | publication, reporting in results databases, or other      |      |
| 39 |                   |     | data sharing arrangements), including any publication      |      |
| 40 |                   |     | restrictions                                               |      |
| 41 |                   |     |                                                            |      |
| 42 |                   |     |                                                            |      |
| 43 |                   |     |                                                            |      |
| 44 |                   | 31b | Authorship eligibility guidelines and any intended use of  | P13  |
| 45 |                   |     | professional writers                                       |      |
| 46 |                   |     |                                                            |      |
| 47 |                   | 31c | Plans, if any, for granting public access to the full      | P13  |
| 48 |                   |     | protocol, participant-level dataset, and statistical code  |      |
| 49 |                   |     |                                                            |      |
| 50 |                   |     |                                                            |      |
| 51 | <b>Appendices</b> |     |                                                            |      |
| 52 | Informed consent  | 32  | Model consent form and other related documentation         | NA   |
| 53 | materials         |     | given to participants and authorised surrogates            |      |
| 54 |                   |     |                                                            |      |
| 55 | Biological        | 33  | Plans for collection, laboratory evaluation, and storage   | NA   |
| 56 | specimens         |     | of biological specimens for genetic or molecular           |      |
| 57 |                   |     | analysis in the current trial and for future use in        |      |
| 58 |                   |     | ancillary studies, if applicable                           |      |
| 59 |                   |     |                                                            |      |
| 60 |                   |     |                                                            |      |

1 \*It is strongly recommended that this checklist be read in conjunction with the SPIRIT 2013  
2 Explanation & Elaboration for important clarification on the items. Amendments to the  
3 protocol should be tracked and dated. The SPIRIT checklist is copyrighted by the SPIRIT  
4 Group under the Creative Commons "[Attribution-NonCommercial-NoDerivs 3.0 Unported](#)"  
5 license.  
6  
7  
8  
9  
10  
11  
12  
13  
14  
15  
16  
17  
18  
19  
20  
21  
22  
23  
24  
25  
26  
27  
28  
29  
30  
31  
32  
33  
34  
35  
36  
37  
38  
39  
40  
41  
42  
43  
44  
45  
46  
47  
48  
49  
50  
51  
52  
53  
54  
55  
56  
57  
58  
59  
60

For peer review only

# BMJ Open

## Effects of brief family psychoeducation for caregivers of people with schizophrenia in Japan provided by visiting nurses: protocol for a cluster randomized controlled trial

|                                 |                                                                                                                                                                                                                                                                                                                                                                                                                                                                                                                                                                                                                                                                                                                                                                                                                                                                                                                                                                                      |
|---------------------------------|--------------------------------------------------------------------------------------------------------------------------------------------------------------------------------------------------------------------------------------------------------------------------------------------------------------------------------------------------------------------------------------------------------------------------------------------------------------------------------------------------------------------------------------------------------------------------------------------------------------------------------------------------------------------------------------------------------------------------------------------------------------------------------------------------------------------------------------------------------------------------------------------------------------------------------------------------------------------------------------|
| Journal:                        | <i>BMJ Open</i>                                                                                                                                                                                                                                                                                                                                                                                                                                                                                                                                                                                                                                                                                                                                                                                                                                                                                                                                                                      |
| Manuscript ID                   | bmjopen-2019-034425.R1                                                                                                                                                                                                                                                                                                                                                                                                                                                                                                                                                                                                                                                                                                                                                                                                                                                                                                                                                               |
| Article Type:                   | Protocol                                                                                                                                                                                                                                                                                                                                                                                                                                                                                                                                                                                                                                                                                                                                                                                                                                                                                                                                                                             |
| Date Submitted by the Author:   | 12-Dec-2019                                                                                                                                                                                                                                                                                                                                                                                                                                                                                                                                                                                                                                                                                                                                                                                                                                                                                                                                                                          |
| Complete List of Authors:       | Yasuma, Naonori; The University of Tokyo, ;<br>Sato, Sayaka; National Institute of Mental Health, Community mental health and law; NCNP<br>Yamaguchi, Sosei; National Center of Neurology and Psychiatry, Department of Community Mental Health & Law, National Institute of Mental Health<br>Matsunaga, Asami; National Center of Neurology and Psychiatry, Department of Community Mental Health & Law, National Institute of Mental Health<br>Shiozawa, Takuma; National Center of Neurology and Psychiatry, Watanabe, Kazuhiro; The University of Tokyo, Department of Mental Health, Graduate School of Medicine<br>Imamura, Kotaro<br>Tachimori, Hisateru; National Center of Neurology and Psychiatry Translational Medical Center<br>Nishi, Daisuke<br>Fujii, Chiyo; National Center of Neurology and Psychiatry, Department of Community Mental Health & Law, National Institute of Mental Health<br>Kawakami, Norito; The University of Tokyo, Department of Mental Health |
| <b>Primary Subject Heading</b>: | Mental health                                                                                                                                                                                                                                                                                                                                                                                                                                                                                                                                                                                                                                                                                                                                                                                                                                                                                                                                                                        |
| Secondary Subject Heading:      | Mental health                                                                                                                                                                                                                                                                                                                                                                                                                                                                                                                                                                                                                                                                                                                                                                                                                                                                                                                                                                        |
| Keywords:                       | Brief family psychoeducation, schizophrenia, caregivers, visiting nurses                                                                                                                                                                                                                                                                                                                                                                                                                                                                                                                                                                                                                                                                                                                                                                                                                                                                                                             |
|                                 |                                                                                                                                                                                                                                                                                                                                                                                                                                                                                                                                                                                                                                                                                                                                                                                                                                                                                                                                                                                      |

SCHOLARONE™  
Manuscripts





I, the Submitting Author has the right to grant and does grant on behalf of all authors of the Work (as defined in the below author licence), an exclusive licence and/or a non-exclusive licence for contributions from authors who are: i) UK Crown employees; ii) where BMJ has agreed a CC-BY licence shall apply, and/or iii) in accordance with the terms applicable for US Federal Government officers or employees acting as part of their official duties; on a worldwide, perpetual, irrevocable, royalty-free basis to BMJ Publishing Group Ltd ("BMJ") its licensees and where the relevant Journal is co-owned by BMJ to the co-owners of the Journal, to publish the Work in this journal and any other BMJ products and to exploit all rights, as set out in our [licence](#).

The Submitting Author accepts and understands that any supply made under these terms is made by BMJ to the Submitting Author unless you are acting as an employee on behalf of your employer or a postgraduate student of an affiliated institution which is paying any applicable article publishing charge ("APC") for Open Access articles. Where the Submitting Author wishes to make the Work available on an Open Access basis (and intends to pay the relevant APC), the terms of reuse of such Open Access shall be governed by a Creative Commons licence – details of these licences and which [Creative Commons](#) licence will apply to this Work are set out in our licence referred to above.

Other than as permitted in any relevant BMJ Author's Self Archiving Policies, I confirm this Work has not been accepted for publication elsewhere, is not being considered for publication elsewhere and does not duplicate material already published. I confirm all authors consent to publication of this Work and authorise the granting of this licence.

1  
2  
3  
4  
5  
6 **1 Effects of brief family psychoeducation for caregivers of people with**  
7 **2 schizophrenia in Japan provided by visiting nurses: protocol for a**  
8 **3 cluster randomized controlled trial**  
9  
10  
11

12 5 Naonori Yasuma<sup>1,2</sup>: nnyy712@gmail.com

13 6 Sayaka Sato<sup>2</sup>: sayakas@ncnp.go.jp

14 7 Sosei Yamaguchi<sup>2</sup>: sosei.yama@ncnp.go.jp

15 8 Asami Matsunaga<sup>2</sup>: asamim@ncnp.go.jp

16 9 Takuma Shiozawa<sup>2</sup>: takuma-shozw@umin.ac.jp

17 10 Hisateru Tachimori<sup>3</sup>: tachi@ncnp.go.jp

18 11 Kazuhiro Watanabe<sup>1</sup>: kzwatanabe-tky@umin.ac.jp

19 12 Kotaro Imamura<sup>1</sup>: kouima-tky@umin.ac.jp

20 13 Daisuke Nishi<sup>1</sup>: d-nishi@m.u-tokyo.ac.jp

21 14 Chiyo Fujii<sup>2</sup>: chyfujii@ncnp.go.jp

22 15 Norito Kawakami<sup>1</sup>: nkawakami@m.u-tokyo.ac.jp

23 16  
24 17 1 Department of Graduate School of Medicine, The University of Tokyo

25 18  
26 19 2 Department of Community Mental Health and Law, National Institute of Mental  
27 20 Health, National Center of Neurology and Psychiatry, Kodaira, Tokyo, Japan

28 21  
29 22 3 Department of Translational Medical Center, National Institute of Mental Health,  
30 23 National Center of Neurology and Psychiatry, Kodaira, Tokyo, Japan

31 24  
32 25 Corresponding author:

33 26 Naonori Yasuma, MD

34 27 Department of Mental Health, Graduate School of Medicine, The University of Tokyo,  
35 28 7-3-1 Hongo, Bunkyo-ku, Tokyo 1130033 Japan

36 29 E-mail: nnyy712@gmail.com

37 30 Phone: +81-3-5841-3521

38 31 Fax: +81-3-5841-3521

39 32  
40 33 Word count: 4,315 words  
41 34  
42 35  
43 36

## 1 **ABSTRACT**

### 2 **Introduction**

3 Development of a support system for families caring for people with schizophrenia in  
4 routine psychiatric care settings is an important issue worldwide. Regional mental  
5 health systems are inadequate for delivering effective services to such family members.  
6 Despite evidence that family psychoeducation (FPE) alleviates the burden of  
7 schizophrenia on families, its dissemination in routine clinical practice remains  
8 insufficient, suggesting the need for developing an effective and implementable  
9 intervention for family caregivers in the existing mental health system setting. In Japan,  
10 the visiting nurse service system would be a practical way of providing family services.  
11 Visiting nurses in local communities are involved in the everyday lives of people with  
12 schizophrenia and their families. Accordingly, they understand their needs and are able  
13 to provide family support as a service covered by national health insurance. The purpose  
14 of this study is to discover whether a brief FPE program provided by visiting nurses  
15 caring for people with schizophrenia will alleviate family burden through a cluster  
16 randomised controlled trial (cRCT).

### 18 **Methods and analysis**

19 The study will be a two-arm, parallel-group (a visiting nurse agency) cRCT. Forty-  
20 seven visiting nurse agencies will be randomly allocated to the brief FPE group  
21 (intervention group) or treatment as usual group (control group). Caregivers of people  
22 with schizophrenia will be randomly recruited by visiting nurses. The primary outcome  
23 will be caregiver burden, measured using the Zarit Burden Interview–Japanese version  
24 (ZBI-22). Outcome assessments will be conducted at baseline, at 1-month follow-up,  
25 and at 6-month follow-up. Multiple levels of three-way interaction of mixed models will  
26 be conducted to examine whether the brief FPE program will alleviate the burden on  
27 caregivers relative to treatment as usual.

### 29 **Ethics and dissemination**

30 The Research Ethics Committee of the Graduate School of Medicine and Faculty of  
31 Medicine, the University of Tokyo, Japan (No. 2019065NI) approved this study. The  
32 results will be published in a scientific peer-reviewed journal.

### 34 **Registration number**

35 UMIN000038044; Pre-results.

## Strengths and Limitations

- This study will evaluate an implementable brief FPE program that potentially reduces time, cost, and staffing problems by incorporating the program into an existing mental health service system, namely visiting nurse services.
- This is the first cRCT of a brief FPE program, a trial with a better study design, which will provide better evidence than past studies.
- A limitation of this study is that all outcomes will be measured by self-report, which may cause information bias or random error.

## 1 INTRODUCTION

2 Families caring for people with schizophrenia receiving community-based mental health  
3 care have a great need for support. People with schizophrenia who have severe  
4 symptoms require long-term care, which imposes a significant burden on families  
5 providing such care.<sup>1</sup> For example, the financial burden on the family is severe because  
6 considerable amounts of time are devoted to caregiving, resulting in the loss of work  
7 opportunities and reduced income.<sup>2</sup> Moreover, insufficient downtime to recover from  
8 the stress of caregiving results in both physical and mental illnesses.<sup>3</sup> Families also  
9 become worn out and stressed by the demands of coping with this illness, which is  
10 characterized by repeated hallucinations and delusions if symptoms do not stabilize.<sup>4</sup>  
11 Furthermore, a parent of a schizophrenic son or daughter might worry about what will  
12 become of their child after his or her death. They might also feel they are not getting  
13 adequate information about what social services are available to them.<sup>5</sup> Stigma against  
14 the illness is also deeply rooted and can lead to families becoming socially isolated.<sup>3</sup>  
15 Therefore, families of people with schizophrenia have various physical, psychological,  
16 economic, and social burdens.

17 Several studies have addressed the development and evaluation of effective  
18 family interventions. According to a systematic review, family psychoeducation (FPE)  
19 is a scientifically effective psychological intervention that has been used to reduce  
20 caregiver burden.<sup>6,7</sup> The components of FPE mainly include information sharing about  
21 the disorder, early warning signs, and relapse prevention as well as and skills training in  
22 coping, communication, and problem solving.<sup>8</sup> FPE can directly improve caregivers'  
23 knowledge about schizophrenia and related caregiving problems.<sup>9</sup> Improved knowledge  
24 of coping strategies and resources can lead to a more positive appraisal of caregiving  
25 experiences by families as well as caregivers' own self-efficacy in coping with the  
26 demands of caring for people with schizophrenia, thereby lessening the burden.<sup>6</sup>

27 Despite the accumulation of evidence, there are several barriers to FPE  
28 implementation. The initial report on the Schizophrenia Patient Outcomes Research  
29 Team (PORT) Treatment Recommendations found that FPE was provided to 31.6% of  
30 inpatients and 9.6% of outpatients who could have benefited from it.<sup>10</sup> A nationwide  
31 survey in Japan revealed that the implementation rate for FPE programs at psychiatric  
32 facilities are similarly low: 35.9% in hospitals and 14.5% in outpatient settings.<sup>11</sup> One  
33 challenge in implementing these programs is the length of the intervention. Most studies  
34 have found that such interventions range from 9 months to 2 years, which is impractical  
35 for medical staff and families in a clinical setting.<sup>12</sup> Other reasons include funding and

1 staff shortages, as well as providing necessary training.<sup>13</sup> In Japan, even if healthcare  
2 professionals perform FPE for a family, they cannot obtain medical expenses. In  
3 addition, while the Meriden Family Program appears to be effective, training is “time-  
4 consuming and expensive.”<sup>14</sup> The medical treatment fee system in most countries  
5 including Japan does not cover such a comprehensive family intervention. The  
6 development of a brief and implementable FPE program within the existing mental  
7 health system that is covered by national health insurance is greatly needed.<sup>15</sup>

8 Brief FPE programs have been examined in previous studies. In terms of the  
9 program framework, studies have found that brief FPE programs, delivered in five  
10 sessions or fewer or lasting no more than 3 months, were easy to conduct for both  
11 practitioners and caregivers.<sup>16</sup> Brief FPE programs have been shown to significantly  
12 increase caregivers’ knowledge of the disorder, leading to reductions in relapse and  
13 rehospitalisation rates in diverse settings.<sup>17,18</sup> In addition, recent research has shown that  
14 a brief FPE program may be beneficial in reducing caregiver burden. In a pre-post test in  
15 India, a brief FPE program comprised of three 1-hour sessions aimed at educating the  
16 primary caregiver and patient about schizophrenia and imparting communication and  
17 problem-solving skills. A significant decrease in caregiver burden, measured using the  
18 Burden Assessment Scale (BAS), was found between baseline and the final follow-up at  
19 3 months.<sup>19</sup> In a randomised controlled trial in Iran, brief FPE consisted of ten 90-minute  
20 sessions held over 5 weeks (two sessions each week) conducted by a psychiatric nurse or  
21 psychiatrist. Caregiver burden measured using the Family Burden Scale (FBS) was  
22 significantly reduced both immediately after the intervention and 1 month later.<sup>20</sup>  
23 However, the effects of brief FPE programs are still inconclusive due to relatively low  
24 methodological quality in prior studies.<sup>7,16</sup> In other words, evidence from a trial with a  
25 better design is needed.

26 Practical implementation strategies for a brief FPE program need to be  
27 considered in addition to a scientific evaluation of the effects. Brief FPE programs  
28 provided by visiting nurses appear to be a potentially feasible and sustainable way of  
29 implementing FPE in a Japanese clinical setting. Visiting nurses routinely visit clients  
30 with schizophrenia and their family members. They have already built rapport with  
31 clients and family members and would be able to respond according to their needs,  
32 which means they could seamlessly provide highly individualized brief FPE.<sup>21</sup> In  
33 addition, the system of visiting nurses could easily be applied because the number of  
34 visiting nurses has been increasing recently in Japan. From a cost perspective, it would  
35 be possible to make family support a reimbursable service under national health

1 insurance to cover psychiatric visiting nurse consultancy fees.<sup>22</sup> Taken together, brief  
2 FPE provided by visiting nurses could overcome the poor implementation rate and  
3 become effective family interventions in the community setting in Japan.

#### 4 **Hypothesis and aims**

5 We hypothesise that brief FPE provided by visiting nurses could alleviate the burden on  
6 families and caregivers of people with schizophrenia. The aim of this study is to clarify  
7 whether visiting nurses providing brief FPE to families caring for people with  
8 schizophrenia alleviates family burden through a cluster randomised controlled trial  
9 (cRCT).

### 10 **METHODS AND ANALYSIS**

#### 11 **Trial design**

12 This study is a two-arm, parallel-group cRCT. The randomisation procedure will be  
13 conducted at the cluster level (visiting nurse agencies). Visiting nurse agencies will be  
14 randomly assigned to the intervention or control (treatment as usual (TAU)) group in a  
15 1:1 ratio. Data will be collected at the individual level. Analyses to evaluate the efficacy  
16 of the intervention program will be conducted at the individual level, taking into  
17 consideration cluster-level effects. The study protocol was registered in the University  
18 Hospital Medical Information Network (UMIN) Clinical Trials Registry (UMIN-CTR  
19 ID, UMIN000038044). This protocol has been reported according to the Standard  
20 Protocol Items: Recommendations for Interventional Trials (SPIRIT) guidelines.<sup>23</sup> The  
21 anticipated trial start date will be 1 October 2019 and the date of last follow-up date will  
22 be 31 May 2020.

#### 23 **Setting and site selection at the cluster level**

24 Figure 1 shows the participant flow chart for this study. The corresponding author (NY)  
25 explained the purpose of this study to 68 visiting nurse agencies in four prefectures in  
26 Japan (Tokyo, Saitama, Kanagawa, and Chiba) through the organisation. Forty-seven  
27 visiting nurse agencies agreed to participate in the study. All the participating visiting  
28 nurse agencies are managed by one organisation.

29 To be included, a visiting nurse agency must provide services mostly to  
30 psychiatric patients or clients, not elderly people or those with physical diseases. In each  
31 agency, visiting nurses care for at least two people with schizophrenia who live with  
32 their family. There are no exclusion criteria at the cluster level.



## **Participant eligibility criteria and recruitment procedure at the individual level**

At the individual level, we set the following inclusion criteria for a caregiver of a person with schizophrenia: 1) is the primary caregiver; 2) aged over 20 years; 3) is a family member of the person with schizophrenia such as a parent, sibling, spouse, or child; and 4) lives with the person with schizophrenia. There are no exclusion criteria for caregivers. In addition, the inclusion criteria for people with schizophrenia are as follows: 1) diagnosis of schizophrenia based on the International Statistical Classification of Diseases and Related Health Problems, 10th revision and 2) use of visiting nurse services.

At each agency, potential participants (caregivers of people with schizophrenia and people with schizophrenia) will be randomly ordered using a recruitment sequence table. To avoid selection bias, the recruitment sequence table will be created using a random number generation method in the Stata statistical software program, version 15. After attending a lecture on study design and ethical considerations, visiting nurses will recruit participants in order starting from the top of the recruitment sequence table until five participants have been recruited. The study will include only participants who voluntarily agree to participate in the study.

## **Randomisation**

Visiting nurse agencies that meet the inclusion criteria will be randomly allocated to the intervention group (brief FPE program) or the control group. Randomisation will be stratified by the median of the average caseload of visiting nurses in each agency since the effect of the intervention might differ based on this factor. If a visiting nurse has many patients, it is expected that family support will be neglected. A random sequence table will be created by a researcher (HT) in another department at our institution who is not involved in the study protocol development process. In addition, another independent researcher (SY) who is not involved in intervention and analysis will conduct the randomisation. SY will inform each visiting nurse agency of the randomisation results. The primary investigator (NY) will be blinded through the entire randomisation process.

## **Intervention program**

The intervention program is a single-family intervention conducted by psychiatric visiting nurses. It is based on the Family Intervention and Support in Schizophrenia: A Manual on Family Intervention for the Mental Health Professional.<sup>24</sup> This program was developed through discussions and collaborations among members of the Family



1  
2  
3  
4  
5  
6  
7  
8  
9  
10  
11  
12  
13  
14  
15  
16  
17  
18  
19  
20  
21  
22  
23  
24  
25  
26  
27  
28  
29  
30  
31  
32  
33  
34  
35  
36  
37  
38  
39  
40  
41  
42  
43  
44  
45  
46  
47  
48  
49  
50  
51  
52  
53  
54  
55  
56  
57  
58  
59  
60

1 Association of Schizophrenia, psychiatric visiting nurses, FPE experts, psychiatrists,  
2 psychiatric nurses, clinical psychologists, and mental health social workers based on the  
3 concept of coproduction and Patient and Public Involvement (PPI).<sup>25</sup> During the  
4 development process, we tried to avoid long sentences, enlarged the characters, and  
5 used visually appealing drawings. The program consists of four sessions that last 60  
6 minutes each using the above tool. It will be completed over a period of a month.  
7 Psychiatric visiting nurses will provide appropriate information using this intervention  
8 tool and advice to the family about living problems based on their own nursing clinical  
9 experience. We will also create a checklist to confirm how many sessions visiting  
10 nurses are actually able to conduct with the participants.

11 Before the intervention, we will provide the intervention team of psychiatric  
12 visiting nurses with a 1-day lecture. The lecture will consist of three parts. First, a  
13 caregiver of a person with schizophrenia will talk about their life problems and what  
14 they want visiting nurses to do; this is expected to increase the motivation of visiting  
15 nurses. Second, basic communication training will be conducted through role-playing.  
16 Visiting nurses, who will be brief FPE providers, will be in groups of three. They will  
17 each play the role of a visiting nurse, caregiver, and evaluator. They will practice  
18 listening to caregivers. Third, the primary investigator (NY) will equip them with basic  
19 knowledge about FPE and explain the contents of this intervention tool and the points  
20 the primary investigator wants to emphasise. Through these trainings, we expect to  
21 improve the motivation, knowledge, and skills of the visiting nurses in providing the  
22 brief FPE program.

23 Table 1 shows the contents of the intervention tool. Session I will cover general  
24 knowledge about schizophrenia: definition, causes, symptoms, prognosis,  
25 pharmacological treatment, and psychosocial rehabilitation. Regarding definition and  
26 causes, visiting nurses will stress that schizophrenia is a brain disease that can manifest  
27 in anyone using the diathesis-stress model and the dopamine hypothesis. It is important  
28 to provide the family with a biological explanation about the aetiology of schizophrenia  
29 because there might be family members who think people become schizophrenic  
30 because of family relationships.<sup>26</sup> In addition to an explanation of the symptoms  
31 themselves, visiting nurses will describe how people with schizophrenia have  
32 difficulties living their own lives due to their symptoms. Visiting nurses will explain the  
33 disease course such as the prodromal phase, acute phase, and recovery phase. Next,  
34 visiting nurses will explain the characteristics of each phase and what to do during each  
35 phase. In terms of prognosis, visiting nurses will emphasise that schizophrenia is not  
36 necessarily a disease with a bad prognosis. In people with their first episode of

1 schizophrenia, about 70% will have a good intermediate to long-term outcome if they  
2 receive appropriate pharmacological therapy.<sup>27</sup> Concerning medication, visiting nurses  
3 will appreciate the idea that people with schizophrenia usually do not want to take  
4 medication. Visiting nurses will talk about the necessity, safety, and reasons for  
5 adherence to pharmacological therapy. In addition, the side effects of antipsychotic  
6 medications will be described clearly, using relevant pictures. Finally, visiting nurses  
7 will give an outline of psychosocial therapy. At the end, participants will answer  
8 questions with dichotomous answers—“yes” or “no”—to confirm what they have  
9 learned from the session.

10         Session II will deal with how to cope with people with schizophrenia and  
11 problem-solving skills. The contents of this session include how to cope with  
12 hallucinations and delusions; signs of recurrence; how to prevent recurrences; how to  
13 cope when the disease gets worse; what to do with people with schizophrenia when they  
14 stay at home all day; how to respond to people with schizophrenia who do not want to  
15 take their medication; how to respond when domestic violence is imminent, is  
16 occurring, or has occurred; and how to get involved when self-injury or suicide is  
17 suspected. Finally, visiting nurses will explain problem-solving skills. In the routine  
18 clinical setting, the family will work on matters that are causing trouble in daily life  
19 using problem-solving skills.

20         Session III will cover communication and emotions: understanding the feelings  
21 of people with schizophrenia, expressed emotion (EE) theory, basic knowledge and  
22 skills about communication, and a lecture on desirable and undesirable communication  
23 with people with schizophrenia. In the first section, visiting nurses will describe the  
24 importance of understanding that people with schizophrenia are likely to have a  
25 pessimistic view about their future. In the second section on EE theory, visiting nurses  
26 will appreciate that it is natural for a family to have high EE with poor knowledge and  
27 lack of support about mental illness.<sup>28</sup> Of note, visiting nurses will not force family  
28 members to play the role of supporter. When family members hear the explanation of  
29 high EE, many might feel that they are responsible for their burden. Visiting nurses will  
30 emphasise that both families and people with schizophrenia should think about positive  
31 and constructive communication to ensure mutual independence. In the third section on  
32 basic knowledge about communication and the lecture of desirable and undesirable  
33 communication with patients, caregivers will practice conversations using real cases and  
34 will be given time to consider better communication strategies.

35         Session IV will focus on the family’s recovery. Topics will include thinking about  
36 the family’s recovery, the importance of living one’s own life, taking care of the

1  
2  
3  
4  
5  
6  
7  
8  
9  
10  
11  
12  
13  
14  
15  
16  
17  
18  
19  
20  
21  
22  
23  
24  
25  
26  
27  
28  
29  
30  
31  
32  
33  
34  
35  
36  
37  
38  
39  
40  
41  
42  
43  
44  
45  
46  
47  
48  
49  
50  
51  
52  
53  
54  
55  
56  
57  
58  
59  
60

1 family's physical and mental health needs, proper stress management, experiences and  
2 messages from members of the Family Association, and identifying available social  
3 resources in the community. During this session, visiting nurses will stress that people  
4 with schizophrenia and family members each have their own lifestyle and individual  
5 goals. Visiting nurses will also encourage family members to live their own lives using  
6 a variety of social resources instead of only working hard to take care of a person with  
7 schizophrenia. In addition, visiting nurses expect that family members will improve  
8 their physical and mental health by acquiring knowledge on self-care and stress  
9 management skills. Furthermore, visiting nurses will introduce the experiences of three  
10 members of the Family Association who have taken care of a person with  
11 schizophrenia. It is expected that others' similar experiences will help family members  
12 understand that they are not the only people experiencing such a hard time and relieve  
13 their feelings of sadness or hopelessness. Finally, visiting nurses will explain the social  
14 resources available in the community for family members and confirm the importance  
15 of connecting with many supporters around them.

### 17 **Control group**

18 Caregivers enrolled in the control group will receive usual care from visiting nurses.  
19 They will be put on a waiting list to receive the same intervention program after  
20 completing the 6-month follow-up assessment. They will not receive any type of  
21 psychoeducation or supportive therapies.

### 23 **Outcomes**

24 Table 2 shows an overview of the outcome measures. Outcome measures will be  
25 assessed at baseline prior to the intervention (T1), immediately after the completion of  
26 the intervention (1-month follow-up, T2), and 6 months after the baseline assessment  
27 (6-month follow-up, T3).

### 29 **Primary outcome for caregivers**

30 Zarit Burden Interview (ZBI-22)

31 ZBI-22 will be used to measure caregiver burden. It consists of 22 items scored on a  
32 five-point Likert scale from 0 (never) to 4 (nearly always), except for the final item on  
33 global burden, which is rated from 0 (not at all) to 4 (extremely). The total score ranges  
34 from 0 to 88, with higher scores indicating higher burden. The Japanese version of ZBI-  
35 22 had a high test-retest reproducibility and internal consistency. Construct validity has  
36 also been confirmed.<sup>29</sup>

## 1 2 3 4 5 6 7 **2 Secondary outcome for caregivers**

### 8 **3 K6**

9  
10 4 K6 will be used to measure sub-clinical depression and anxiety disorders as part of a  
11 5 self-administered questionnaire. It consists of six items answered on a five-point Likert  
12 6 scale. Scores range from 0 to 24, with higher scores representing higher degrees of sub-  
13 7 clinical depression and anxiety disorder. The Japanese versions of the K6 have  
14 8 essentially equivalent screening performance as the original English versions.<sup>30</sup>  
15 9

### 10 **10 General Self Efficacy Scale (GSES)**

11 11 GSES is a measurement of self-efficacy in daily living. It includes 16 items with  
12 12 dichotomous questions. The higher the score, the better the self-efficacy, in general.  
13 13 GSES had high test-retest reproducibility and internal consistency. Construct validity  
14 14 has been confirmed.<sup>31</sup>  
15 15

### 16 **16 WHO-5**

17 17 WHO-5 will be used to measure subjective quality of life based on positive mood (good  
18 18 spirits and relaxation), vitality (being active and waking up fresh and rested), and  
19 19 general interest (being interested in things). It consists of five items rated on a six-point  
20 20 Likert scale. Higher scores mean higher well-being. The Japanese version of WHO-5  
21 21 has adequate internal consistency. It has been confirmed to have external concurrent  
22 22 validity and external discriminatory validity.<sup>32</sup>  
23 23

### 24 **24 Knowledge of Illness and Drug Inventory (KIDI)**

25 25 KIDI will be used to assess knowledge regarding mental illness and the effects of  
26 26 medications on mental illness. There are two sub-scales: 10 items assessing knowledge  
27 27 of mental illness and 10 items assessing knowledge of the effects of antipsychotic  
28 28 drugs. This inventory consists of a self-reported inventory where respondents are asked  
29 29 to select the correct answer from three choices, with higher scores representing greater  
30 30 knowledge. KIDI is frequently used to assess knowledge about mental disorders and  
31 31 treatments in Japan.<sup>33</sup>  
32 32

## 33 **33 Secondary outcomes in people with schizophrenia**

### 34 **34 Behavior and Symptom Identification Scale (BASIS-32)**

35 35 BASIS-32 is a commonly used measure in mental health. It includes 32 items on a five-  
36 36 point Likert scale, where 0 indicates no difficulties and 4 indicates severe difficulties.

1  
2  
3  
4  
5  
6 1 The scale measures five factors: (1) relation to self and others (seven items); (2)  
7 2 depression/anxiety (six items); (3) everyday life and role functioning (nine items); (4)  
8 3 impulsive and addictive behaviour (six items); and (5) psychosis (four items). Factors 1,  
9 4 2, 4, and 5 are assessed as the total score divided by the number of items answered  
10 5 (mean score), while factor 3 is assessed based non the highest rating. Internal  
11 6 consistency and construct validity of the Japanese version of BASIS-32 have been  
12 7 demonstrated.<sup>34</sup>  
13 8

### 9 WHO-5

10 WHO-5 is used to measure subjective quality of life based on positive mood (good  
11 11 spirits and relaxation), vitality (being active and waking up fresh and rested), and  
12 12 general interest (being interested in things). WHO-5 comprises five items rated on a six-  
13 13 point Likert scale. Higher scores mean higher well-being. The Japanese version of  
14 14 WHO-5 has adequate internal consistency. It has been confirmed to have external  
15 15 concurrent validity and external discriminatory validity.<sup>32</sup>  
16 16

### 17 Hospitalisation by 6-month follow-up

18 18 This is a question with a dichotomous answer (yes or no) about whether the patient has  
19 19 been hospitalised during the past 6 months. The answer will be provided by the  
20 20 caregiver at baseline and the 6-month follow-up.  
21 21

### 22 **Sample size calculation**

23 23 The sample size required was calculated according to guidelines in the Consolidated  
24 24 Standards of Reporting Trials (CONSORT) for cRCTs,<sup>35</sup> taking into account intra-class  
25 25 correlations (ICCs). The effect size of a brief FPE program for individual caregiver  
26 26 burden was estimated based on a previous pre-post test.<sup>19</sup> The pre-post test concluded  
27 27 that the standardised mean difference (d) of brief FPE on family burden was 0.46.  
28 28 Sample size was estimated as 76 in each arm based on an alpha error probability of 0.05  
29 29 and power (1- $\beta$ ) of 0.80, using G\*Power version 3.1.9.2.<sup>36 37</sup> cRCTs should be  
30 30 multiplied by design effect (1+[m-1] $\rho$ ), where m is the average cluster size and  $\rho$  is the  
31 31 ICC.<sup>38</sup> The estimated ICC for the primary outcome in this study was set to 0.05 and the  
32 32 average number of caregivers per cluster was set at five people. Assuming an attrition  
33 33 rate of 20%, the required sample size is 110 caregivers in each arm; thus, at least 44  
34 34 visiting nurse agencies will be recruited.  
35 35

### 36 **Quantitative analysis**

1 The statistician will be blinded to the treatment group. We will analyse clinical  
2 outcomes on the basis of intention to treat and model the effect of the intervention on  
3 primary and secondary continuous outcomes using generalised linear latent and mixed  
4 models (GLLAMMs). This will allow for missing data to be taken into account within  
5 the statistical model. In this study, a three-level model will be used, with repeated  
6 measures nested in participants and participants nested in clusters. Time (baseline, 1-  
7 month follow-up, 6-month follow-up) will be considered level 1, individual caregivers  
8 will be considered level 2, and clusters (visiting nurse stations) will be considered level  
9 3. Regarding fixed effects, condition (intervention versus control), time, and a two-way  
10 interaction effect, condition by time, will be included. Models will adjust for baseline  
11 differences in caregiver socio-demographics such as age, gender, education, household  
12 income, family relationship with the person with schizophrenia, length of caregiving,  
13 and length of visiting nurse system use. Multiple levels of Cox proportional hazards  
14 regression models will also be used for the dichotomous question of hospitalisation at  
15 the 6-month follow-up. A *p*-value of less than 0.05 will be considered statistically  
16 significant.

### 18 **Data monitoring**

19 A data monitoring committee (DMC) will be set up. It will consist of at least two  
20 independent members. The DMC will meet monthly after the first participant has been  
21 randomised. The purpose of the meeting will be to review participation rates and  
22 reasons for study dropout. The DMC will be independent from any sponsor and  
23 competing interest.

### 25 **Patient and public involvement**

26 The research question, study design, and outcome measures were determined based on a  
27 discussion with representatives of the Family Association of Schizophrenia. The  
28 intervention program was also developed through the discussion and collaboration  
29 among members of the Family Association of Schizophrenia, psychiatric visiting  
30 nurses, FPE experts, psychiatrists, psychiatric nurses, clinical psychologists, and mental  
31 health social workers. After the completion of the study, this intervention tool will be  
32 available for anyone who wants to use it via the internet.

### 34 **Ethics and dissemination**

35 Ethical considerations



1  
2  
3  
4  
5  
6 1 The authors assert that all procedures contributing to this work comply with the ethical  
7 2 standards of the relevant national and institutional committees on human experimentation  
8 3 and with the Helsinki Declaration of 1975, as revised in 2008. The study protocol was  
9 4 approved by the Research Ethics Committee of the Graduate School of Medicine and the  
10 5 Faculty of Medicine at the University of Tokyo, Japan (No. 2019065NI). We will obtain  
11 6 informed consent from all caregivers and patients. The consent form will inform  
12 7 caregivers and patients that we guarantee protection of personal information and that the  
13 8 data will be anonymous and used only for academic purposes. There are no competing  
14 9 interests. This study is supported by fundamental study on effective community services  
15 10 for people with severe mental disorders and their families.  
16 11

### 12 **Dissemination of the research findings**

13 The findings will be published in a scientific peer-reviewed journal according to the  
14 14 CONSORT guidelines for cRCTs.<sup>35</sup> The participants will be informed of conference  
15 15 presentations and publications.  
16 16

### 17 **Strengths and limitations**

18 18 The study has both strengths and limitations. First, the study will evaluate an  
19 19 implementable brief FPE program that potentially reduces time, cost, and staffing  
20 20 problems by incorporating the program into an existing mental health service system,  
21 21 namely visiting nurse services. Second, this is the first cRCT of a brief FPE program, a  
22 22 trial with a better study design. It will provide better evidence than past studies. Third,  
23 23 based on the concept of coproduction and PPI,<sup>25</sup> the study incorporated a variety of  
24 24 viewpoints from caregivers, visiting nurses, and FPE experts.

25 25 We recognise three limitations of this study. First, since the sampling method for  
26 26 participating agencies was not random, there is a possibility of selection bias. Second,  
27 27 since subjects will provide data through a self-reported questionnaire, information bias  
28 28 or random error is possible. For example, the severity of symptoms in people with  
29 29 schizophrenia that impact a caregiver's burden may not be accurately measured. Third,  
30 30 we designed the study and intervention based on coproduction, but there are still  
31 31 concerns about its feasibility in actual clinical settings. For example, participants might  
32 32 not complete all four sessions due to the condition of people with schizophrenia, family  
33 33 work, and family hospitalisation. These may lead to a high attrition rate during  
34 34 implementation.  
35 35

### 36 **Acknowledgments**

1 The authors would like to thank the members of the *Mokuseikai* Family Association of  
2 Schizophrenia for their invaluable advice on many aspects of the project.

#### 3 4 **Contributors**

5 NY is the principal investigator responsible for the initial draft of this manuscript and  
6 organising and implementing the study. NY and KW calculated the sample size. NY,  
7 KW, SY, and MA decided on the analytic strategy. SS, TS, HT, KI, DN, CF and NK  
8 helped throughout the development of the interventions and gave valuable feedback to  
9 the present study protocol. All authors have read and approved the final manuscript.

10  
11 **Funding:** This work is supported by Fundamental study on effective community  
12 services for people with severe mental disorders and their families.

13  
14 **Competing interests:** None declared.

15  
16 **Patient Consent:** Obtained.

17  
18 **Ethics approval:** Research Committee of the Graduate School of Medicine and the  
19 Faculty of Medicine at the University of Tokyo, Japan.

#### 20 21 **REFERENCES**

- 22 1. Awad AG, Voruganti LN. The burden of schizophrenia on caregivers: a review.  
23 *Pharmacoecon Open* 2008;26:149–62. doi:10.2165/00019053-200826020-00005
- 24  
25 2. Saunders JC. Families living with severe mental illness: a literature review. *Issues*  
26 *Ment Health Nurs* 2003;24:175–98. doi:10.1080/01612840305301
- 27  
28 3. Shah AJ, Wadoo O, Latoo J. Psychological distress in carers of people with mental  
29 disorders. *British Journal of Medical Practitioners* 2010;3:a327.
- 30  
31 4. Gopinath PA, Chaturvedi S. Distress behaviour of schizophrenics at home. *Acta*  
32 *Psychiatr Scand* 1992;86:185–8. doi:10.1111/j.1600-0447.1992.tb03249.x
- 33  
34 5. McAuliffe R, O'Connor L, Meagher D. Parents' experience of living with and caring  
35 for an adult son or daughter with schizophrenia at home in Ireland: a qualitative  
36 study. *J Psychiatr Ment Health Nurs* 2014;21:145–53. doi:10.1111/jpm.12065



1  
2  
3  
4  
5  
6  
7  
8  
9  
10  
11  
12  
13  
14  
15  
16  
17  
18  
19  
20  
21  
22  
23  
24  
25  
26  
27  
28  
29  
30  
31  
32  
33  
34  
35  
36  
37  
38  
39  
40  
41  
42  
43  
44  
45  
46  
47  
48  
49  
50  
51  
52  
53  
54  
55  
56  
57  
58  
59  
60

- 1
- 2
- 3
- 4
- 5
- 6 1
- 7 2 6. Sin J, Gillard S, Spain D, *et al.* Effectiveness of psychoeducational interventions for
- 8 3 family carers of people with psychosis: a systematic review and meta-analysis. *Clin*
- 9 4 *Psychol Rev* 2017;56:13–24. doi:10.1016/j.cpr.2017.05.002
- 10 5
- 11 6 7. Sin J, Jordan CD, Barley EA, *et al.* Psychoeducation for siblings of people with
- 12 7 severe mental illness. *Cochrane Database Syst Rev* 2015;5:Cd010540.
- 13 8 doi:10.1002/14651858.CD010540.pub2
- 14 9
- 15 10 8. Dixon L, McFarlane WR, Lefley H, *et al.* Evidence-based practices for services to
- 16 11 families of people with psychiatric disabilities. *Psychiatr Serv* 2001;52:903–10.
- 17 12 doi:10.1176/appi.ps.52.7.903
- 18 13
- 19 14 9. Birchwood M, Smith J, Cochrane R. Specific and non-specific effects of educational
- 20 15 intervention for families living with schizophrenia. A comparison of three methods.
- 21 16 *Br J Psychiatry* 1992;160:806–14. doi:10.1192/bjp.160.6.806
- 22 17
- 23 18 10. Lehman AF, Steinwachs DM. Patterns of usual care for schizophrenia: initial results
- 24 19 from the Schizophrenia Patient Outcomes Research Team (PORT) Client Survey.
- 25 20 *Schizophr Bull* 1998;24:11–20; discussion 20–32.
- 26 21 doi:10.1093/oxfordjournals.schbul.a033303
- 27 22
- 28 23 11. Oshima I, Mino Y, Nakamura Y, *et al.* Implementation and dissemination of family
- 29 24 psychoeducation in Japan: nationwide survey on psychiatric hospitals in 1995 and
- 30 25 2001. *Journal of Social Policy & Social Work* 2007;11:5–16.
- 31 26
- 32 27 12. Rummel-Kluge C, Kissling W. Psychoeducation in schizophrenia: new
- 33 28 developments and approaches in the field. *Curr Opin Psychiatry* 2008;21:168–72.
- 34 29 doi:10.1097/YCO.0b013e3282f4e574
- 35 30
- 36 31 13. Harvey C. Family psychoeducation for people living with schizophrenia and their
- 37 32 families. *BJPsych Adv* 2018;24:9–19. doi:10.1192/bja.2017.4
- 38 33
- 39 34 14. Fadden G, Heelis R. 2011. The Meriden Family Programme: lessons learned over
- 40 35 10 years. *J Ment Health* 2011;20:79–88. doi:10.3109/09638237.2010.492413
- 41 36 [published online first: 2 September 2010].

- 1  
2  
3  
4  
5  
6 1  
7 2 15. McFarlane WR, Dixon L, Lukens E, *et al.* Family psychoeducation and  
8 3 schizophrenia: a review of the literature. *J Marital Fam Ther* 2003;29:223–45.  
9 4  
10 5 16. Okpokoro U, Adams CE, Sampson S. Family intervention (brief) for schizophrenia.  
11 6 *Cochrane Database Syst Rev* 2014;3:Cd009802.  
12 7 doi:10.1002/14651858.CD009802.pub2  
13 8  
14 9 17. Pitschel-Walz G, Leucht S, Bauml J, *et al.* The effect of family interventions on  
15 10 relapse and rehospitalization in schizophrenia—a meta-analysis. *Schizophr Bull*  
16 11 2001;27:73–92. doi:10.1093/oxfordjournals.schbul.a006861.  
17 12  
18 13 18. Smith JV, Birchwood MJ. Specific and non-specific effects of educational  
19 14 intervention with families living with a schizophrenic relative. *Br J Psychiatry*  
20 15 1987;150:645–52. doi:10.1192/bjp.150.5.645.  
21 16  
22 17 19. Devaramane V, Pai NB, Vella SL. The effect of a brief family intervention on  
23 18 primary carer's functioning and their schizophrenic relatives levels of  
24 19 psychopathology in India. *Asian J Psychiatr* 2011;4:183–7.  
25 20 doi:10.1016/j.ajp.2011.06.004  
26 21  
27 22 20. Sharif F, Shaygan M, Mani A. Effect of a psycho-educational intervention for  
28 23 family members on caregiver burdens and psychiatric symptoms in patients with  
29 24 schizophrenia in Shiraz, Iran. *BMC Psychiatry* 2012;12:48. doi:10.1186/1471-244x-  
30 25 12-48  
31 26  
32 27 21. Huang XY, Ma WF, Shih HH, *et al.* Roles and functions of community mental  
33 28 health nurses caring for people with schizophrenia in Taiwan. *J Clin Nurs*  
34 29 2008;17:3030–40. doi:10.1111/j.1365-2702.2008.02426.x  
35 30  
36 31 22. Setoya N, Kayama M, Tsunoda A, *et al.* A survey of the family care provided in  
37 32 psychiatric home-visit nursing and related characteristics of clients. *Japanese*  
38 33 *Bulletin of Social Psychiatry* 2011;20:17–25.  
39 34  
40  
41  
42  
43  
44  
45  
46  
47  
48  
49  
50  
51  
52  
53  
54  
55  
56  
57  
58  
59  
60

- 1  
2  
3  
4  
5  
6 1 23. Chan AW, Tetzlaff JM, Altman DG, *et al.* SPIRIT 2013 statement: defining  
7 2 standard protocol items for clinical trials. *Ann Intern Med* 2013;158:200–7.  
8 3 doi:10.7326/0003-4819-158-3-201302050-00583  
9  
10 4 24. Varghese M, Shah A, Kumar GSU, *et al.* Family intervention and support in  
11 5 schizophrenia: a manual on family intervention for the mental health professional,  
12 6 version 2. Bangalore, India: National Institute of Mental Health and Neurosciences.  
13 7  
14 8 25. Batalden M, Batalden P, Margolis P, *et al.* Coproduction of healthcare service. *BMJ*  
15 9 *Qual Safe* 2016;25:509–17. doi:10.1136/bmjqs-2015-004315  
16 10  
17 11 26. Ferriter M, Huband N. Experiences of parents with a son or daughter suffering from  
18 12 schizophrenia. *J Psychiatr Ment Health Nurs* 2003;10:552–60. doi:10.1046/j.1365-  
19 13 2850.2003.00624.x  
20 14  
21 15 27. Menezes NM, Arenovich T, Zipursky RB. A systematic review of longitudinal  
22 16 outcome studies of first-episode psychosis. *Psychol Med* 2006;36:1349–62.  
23 17 doi:10.1017/s0033291706007951  
24 18  
25 19 28. Amaresha AC, Venkatasubramanian G. Expressed emotion in schizophrenia: an  
26 20 overview. *Indian J Psychol Med* 2012;34:12–20. doi:10.4103/0253-7176.96149  
27 21  
28 22 29. Arai Y, Kudo K, Hosokawa T, *et al.* Reliability and validity of the Japanese version  
29 23 of the Zarit Caregiver Burden interview. *Psychiatry Clin Neurosci* 1997;51:281–7.  
30 24 doi:10.1111/j.1440-1819.1997.tb03199.x  
31 25  
32 26 30. Sakurai K, Nishi A, Kondo K, *et al.* Screening performance of K6/K10 and other  
33 27 screening instruments for mood and anxiety disorders in Japan. *Psychiatry Clin*  
34 28 *Neurosci* 2011;65:434–41. doi:10.1111/j.1440-1819.2011.02236.x  
35 29  
36 30 31. Sakano Y, Tohjoh M. The General Self-Efficacy Scale (GSES): scale development  
37 31 and validation. *Japanese Journal of Behavior Therapy* 1986;12:73–82.  
38 32  
39 33 32. Awata S, Bech P, Yoshida S, *et al.* Reliability and validity of the Japanese version  
40 34 of the World Health Organization-Five Well-Being Index in the context of detecting  
41 35 depression in diabetic patients. *Psychiatry Clin Neurosci* 2007;61:112–9.  
42 36 doi:10.1111/j.1440-1819.2007.01619.x

- 1  
2  
3  
4  
5  
6 1  
7 2 33. Maeda M, OM, Renri T, *et al.* It is as a result of disease drug knowledge degree  
8 3 investigation (Knowledge of Illness and Drugs Inventory, KIDI) for a person with  
9 4 IIB-29 schizophrenia and the family. *Japanese Bulletin of Social Psychiatry*  
10 5 1994;2:173–4.  
11 6  
12 7 34. Setoya Y, N. Y., Kurita H. Utility of the Japanese version of the BASIS-32 in  
13 8 inpatients in psychiatric hospital. *Japanese Journal of Clinical Psychiatry*  
14 9 2002;31:571–5.  
15 10  
16 11 35. Campbell MK, Piaggio G, Elbourne DR, *et al.* Consort 2010 statement: extension to  
17 12 cluster randomised trials. *BMJ* 2012;345:e5661. doi:10.1136/bmj.e5661  
18 13  
19 14 36. Faul F, Erdfelder E, Buchner A, *et al.* Statistical power analyses using G\*Power 3.1:  
20 15 tests for correlation and regression analyses. *Behav Res Methods* 2009;41:1149–60.  
21 16 doi:10.3758/brm.41.4.1149  
22 17  
23 18 37. Faul F, Erdfelder E, Lang AG, *et al.* G\*Power 3: a flexible statistical power analysis  
24 19 program for the social, behavioral, and biomedical sciences. *Behav Res Methods*  
25 20 2007;39:175–91.  
26 21  
27 22 38. Campbell MK, Elbourne DR, Altman DG. CONSORT statement: extension to  
28 23 cluster randomised trials. *BMJ* 2004;328:702–8. doi:10.1136/bmj.328.7441.702  
29 24  
30 25  
31 26  
32 27  
33 28  
34 29  
35 30  
36 31  
37 32  
38 33  
39 34  
40  
41  
42  
43  
44  
45  
46  
47  
48  
49  
50  
51  
52  
53  
54  
55  
56  
57  
58  
59  
60

**Table 1. Outline of the brief family psychoeducation program**

| Session number | Session aim                                                             | Content                                                                                                                                                                                                                                                                                                                                                                                                                                                                                                              |
|----------------|-------------------------------------------------------------------------|----------------------------------------------------------------------------------------------------------------------------------------------------------------------------------------------------------------------------------------------------------------------------------------------------------------------------------------------------------------------------------------------------------------------------------------------------------------------------------------------------------------------|
| I              | General knowledge about schizophrenia                                   | Definition, causes, symptoms, prognosis, pharmacological treatment, psychosocial rehabilitation.<br>Activity: Let's review the knowledge gained in this session.                                                                                                                                                                                                                                                                                                                                                     |
| II             | How to cope with people with schizophrenia using problem-solving skills | How to cope with hallucinations and delusions; signs of recurrence and how to prevent recurrence; how to cope when the disease gets worse; what to do with people with schizophrenia when they stay at home all day; how to respond to people with schizophrenia who do not want to take their medication; what to do when domestic violence is imminent, is happening, or has happened; how to get involved when self-injury or suicide is suspected.<br>Activity: Let's learn how to apply problem-solving skills. |
| III            | Handling communication and emotions                                     | Understanding the feelings of people with schizophrenia, expressed emotion theory, basic knowledge about communication, and lecture about desirable and undesirable communication with people with schizophrenia.<br>Activity: Let's practice conversations using real cases.                                                                                                                                                                                                                                        |
| IV             | Family recovery                                                         | Thinking about the family's recovery, importance of living one's own life, taking care of the family's physical and mental health needs, proper stress management, and experiences and messages from members of the Family Association.<br>Activity: Let's identify social resources in the community and recognise the importance of connecting with many supporters around families.                                                                                                                               |

This intervention program consists of four 60-minute modules completed over 1 month.

**Table 2. Outcome measures**

|                           | Outcome measure                                      | Baseline | 1-month follow-up | 6-month follow-up |
|---------------------------|------------------------------------------------------|----------|-------------------|-------------------|
| Caregivers                | Zarit Burden Interview (ZBI-22)                      | ✓        | ✓                 | ✓                 |
|                           | K6                                                   | ✓        | ✓                 | ✓                 |
|                           | General Self-Efficacy Scale (GSES)                   | ✓        | ✓                 | ✓                 |
|                           | WHO-5                                                | ✓        | ✓                 | ✓                 |
|                           | Knowledge of Illness and Drug Inventory (KIDI)       | ✓        | ✓                 | ✓                 |
| People with schizophrenia | Behavior and Symptom Identification Scale (BASIS-32) | ✓        | ✓                 | ✓                 |
|                           | WHO-5                                                | ✓        | ✓                 | ✓                 |
|                           | Hospitalisation during the past 6 months             | ✓        | –                 | ✓                 |

1  
2  
3  
4  
5  
6  
7  
8  
9  
10  
11  
12  
13  
14  
15  
16  
17  
18  
19  
20  
21  
22  
23  
24  
25  
26  
27  
28  
29  
30  
31  
32  
33  
34  
35  
36  
37  
38  
39  
40  
41  
42  
43  
44  
45  
46

**Figure 1: Participant flow chart**

For peer review only

Figure 1. Participant flow chart

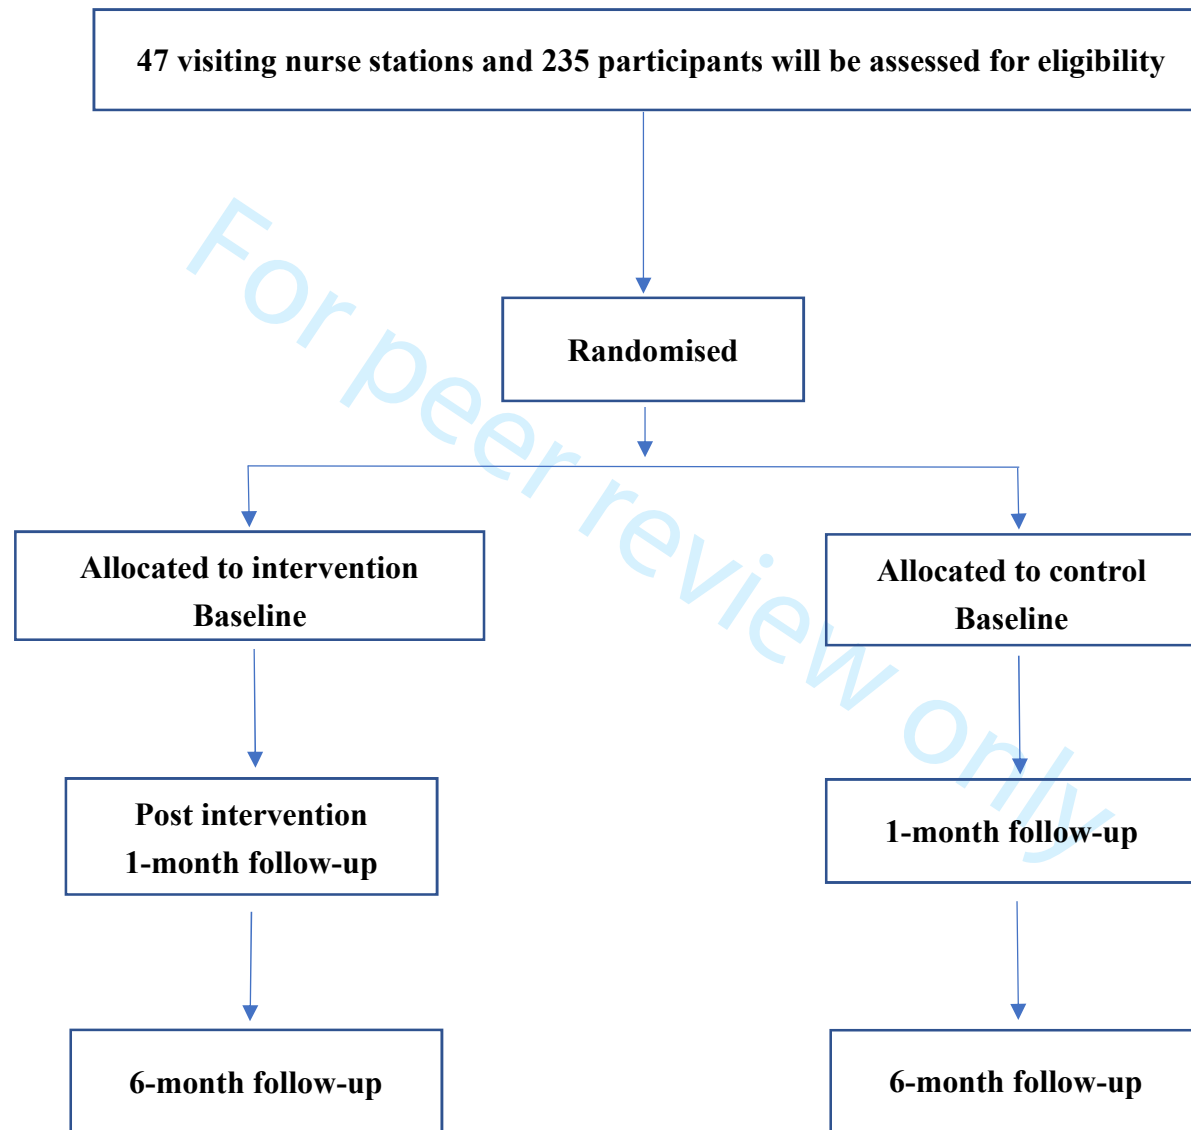





SPIRIT 2013 Checklist: Recommended items to address in a clinical trial protocol and related documents\*

| Section/item                      | ItemNo | Description                                                                                                                                                                                                                                                                              |      |
|-----------------------------------|--------|------------------------------------------------------------------------------------------------------------------------------------------------------------------------------------------------------------------------------------------------------------------------------------------|------|
| <b>Administrative information</b> |        |                                                                                                                                                                                                                                                                                          |      |
| Title                             | 1      | Descriptive title identifying the study design, population, interventions, and, if applicable, trial acronym                                                                                                                                                                             | P1   |
| Trial registration                | 2a     | Trial identifier and registry name. If not yet registered, name of intended registry                                                                                                                                                                                                     | P2   |
|                                   | 2b     | All items from the World Health Organization Trial Registration Data Set                                                                                                                                                                                                                 | NA   |
| Protocol version                  | 3      | Date and version identifier                                                                                                                                                                                                                                                              | NA   |
| Funding                           | 4      | Sources and types of financial, material, and other support                                                                                                                                                                                                                              | P15  |
| Roles and responsibilities        | 5a     | Names, affiliations, and roles of protocol contributors                                                                                                                                                                                                                                  | P1   |
|                                   | 5b     | Name and contact information for the trial sponsor                                                                                                                                                                                                                                       | NA   |
|                                   | 5c     | Role of study sponsor and funders, if any, in study design; collection, management, analysis, and interpretation of data; writing of the report; and the decision to submit the report for publication, including whether they will have ultimate authority over any of these activities | NA   |
|                                   | 5d     | Composition, roles, and responsibilities of the coordinating centre, steering committee, endpoint adjudication committee, data management team, and other individuals or groups overseeing the trial, if applicable (see Item 21a for data monitoring committee)                         | NA   |
| <b>Introduction</b>               |        |                                                                                                                                                                                                                                                                                          |      |
| Background and rationale          | 6a     | Description of research question and justification for undertaking the trial, including summary of relevant studies (published and unpublished) examining benefits and harms for each intervention                                                                                       | P4-6 |

|    |                                                           |     |                                                                                                                                                                                                                                                                                                                                                                                                            |
|----|-----------------------------------------------------------|-----|------------------------------------------------------------------------------------------------------------------------------------------------------------------------------------------------------------------------------------------------------------------------------------------------------------------------------------------------------------------------------------------------------------|
| 1  |                                                           |     |                                                                                                                                                                                                                                                                                                                                                                                                            |
| 2  |                                                           | 6b  | Explanation for choice of comparators P4-6                                                                                                                                                                                                                                                                                                                                                                 |
| 3  |                                                           |     |                                                                                                                                                                                                                                                                                                                                                                                                            |
| 4  | Objectives                                                | 7   | Specific objectives or hypotheses P6                                                                                                                                                                                                                                                                                                                                                                       |
| 5  |                                                           |     |                                                                                                                                                                                                                                                                                                                                                                                                            |
| 6  | Trial design                                              | 8   | Description of trial design including type of trial (eg, P6<br>parallel group, crossover, factorial, single group),<br>allocation ratio, and framework (eg, superiority,<br>equivalence, noninferiority, exploratory)                                                                                                                                                                                      |
| 7  |                                                           |     |                                                                                                                                                                                                                                                                                                                                                                                                            |
| 8  |                                                           |     |                                                                                                                                                                                                                                                                                                                                                                                                            |
| 9  |                                                           |     |                                                                                                                                                                                                                                                                                                                                                                                                            |
| 10 |                                                           |     |                                                                                                                                                                                                                                                                                                                                                                                                            |
| 11 |                                                           |     |                                                                                                                                                                                                                                                                                                                                                                                                            |
| 12 | <b>Methods: Participants, interventions, and outcomes</b> |     |                                                                                                                                                                                                                                                                                                                                                                                                            |
| 13 |                                                           |     |                                                                                                                                                                                                                                                                                                                                                                                                            |
| 14 | Study setting                                             | 9   | Description of study settings (eg, community clinic, P6-7<br>academic hospital) and list of countries where data<br>will be collected. Reference to where list of study<br>sites can be obtained                                                                                                                                                                                                           |
| 15 |                                                           |     |                                                                                                                                                                                                                                                                                                                                                                                                            |
| 16 |                                                           |     |                                                                                                                                                                                                                                                                                                                                                                                                            |
| 17 |                                                           |     |                                                                                                                                                                                                                                                                                                                                                                                                            |
| 18 |                                                           |     |                                                                                                                                                                                                                                                                                                                                                                                                            |
| 19 | Eligibility criteria                                      | 10  | Inclusion and exclusion criteria for participants. If P6-7<br>applicable, eligibility criteria for study centres and<br>individuals who will perform the interventions (eg,<br>surgeons, psychotherapists)                                                                                                                                                                                                 |
| 20 |                                                           |     |                                                                                                                                                                                                                                                                                                                                                                                                            |
| 21 |                                                           |     |                                                                                                                                                                                                                                                                                                                                                                                                            |
| 22 |                                                           |     |                                                                                                                                                                                                                                                                                                                                                                                                            |
| 23 |                                                           |     |                                                                                                                                                                                                                                                                                                                                                                                                            |
| 24 |                                                           |     |                                                                                                                                                                                                                                                                                                                                                                                                            |
| 25 | Interventions                                             | 11a | Interventions for each group with sufficient detail to P7-9<br>allow replication, including how and when they will<br>be administered                                                                                                                                                                                                                                                                      |
| 26 |                                                           |     |                                                                                                                                                                                                                                                                                                                                                                                                            |
| 27 |                                                           |     |                                                                                                                                                                                                                                                                                                                                                                                                            |
| 28 |                                                           |     |                                                                                                                                                                                                                                                                                                                                                                                                            |
| 29 |                                                           |     |                                                                                                                                                                                                                                                                                                                                                                                                            |
| 30 |                                                           | 11b | Criteria for discontinuing or modifying allocated P7-9<br>interventions for a given trial participant (eg, drug<br>dose change in response to harms, participant<br>request, or improving/worsening disease)                                                                                                                                                                                               |
| 31 |                                                           |     |                                                                                                                                                                                                                                                                                                                                                                                                            |
| 32 |                                                           |     |                                                                                                                                                                                                                                                                                                                                                                                                            |
| 33 |                                                           |     |                                                                                                                                                                                                                                                                                                                                                                                                            |
| 34 |                                                           |     |                                                                                                                                                                                                                                                                                                                                                                                                            |
| 35 |                                                           | 11c | Strategies to improve adherence to intervention P7-9<br>protocols, and any procedures for monitoring<br>adherence (eg, drug tablet return, laboratory tests)                                                                                                                                                                                                                                               |
| 36 |                                                           |     |                                                                                                                                                                                                                                                                                                                                                                                                            |
| 37 |                                                           |     |                                                                                                                                                                                                                                                                                                                                                                                                            |
| 38 |                                                           |     |                                                                                                                                                                                                                                                                                                                                                                                                            |
| 39 |                                                           |     |                                                                                                                                                                                                                                                                                                                                                                                                            |
| 40 |                                                           | 11d | Relevant concomitant care and interventions that P7-9<br>are permitted or prohibited during the trial                                                                                                                                                                                                                                                                                                      |
| 41 |                                                           |     |                                                                                                                                                                                                                                                                                                                                                                                                            |
| 42 |                                                           |     |                                                                                                                                                                                                                                                                                                                                                                                                            |
| 43 | Outcomes                                                  | 12  | Primary, secondary, and other outcomes, including P10-12<br>the specific measurement variable (eg, systolic<br>blood pressure), analysis metric (eg, change from<br>baseline, final value, time to event), method of<br>aggregation (eg, median, proportion), and time<br>point for each outcome. Explanation of the clinical<br>relevance of chosen efficacy and harm outcomes<br>is strongly recommended |
| 44 |                                                           |     |                                                                                                                                                                                                                                                                                                                                                                                                            |
| 45 |                                                           |     |                                                                                                                                                                                                                                                                                                                                                                                                            |
| 46 |                                                           |     |                                                                                                                                                                                                                                                                                                                                                                                                            |
| 47 |                                                           |     |                                                                                                                                                                                                                                                                                                                                                                                                            |
| 48 |                                                           |     |                                                                                                                                                                                                                                                                                                                                                                                                            |
| 49 |                                                           |     |                                                                                                                                                                                                                                                                                                                                                                                                            |
| 50 |                                                           |     |                                                                                                                                                                                                                                                                                                                                                                                                            |
| 51 |                                                           |     |                                                                                                                                                                                                                                                                                                                                                                                                            |
| 52 |                                                           |     |                                                                                                                                                                                                                                                                                                                                                                                                            |
| 53 | Participant                                               | 13  | Time schedule of enrolment, interventions P6-7<br>timeline (including any run-ins and washouts),<br>assessments, and visits for participants. A<br>schematic diagram is highly recommended (see<br>Figure)                                                                                                                                                                                                 |
| 54 |                                                           |     |                                                                                                                                                                                                                                                                                                                                                                                                            |
| 55 |                                                           |     |                                                                                                                                                                                                                                                                                                                                                                                                            |
| 56 |                                                           |     |                                                                                                                                                                                                                                                                                                                                                                                                            |
| 57 |                                                           |     |                                                                                                                                                                                                                                                                                                                                                                                                            |
| 58 |                                                           |     |                                                                                                                                                                                                                                                                                                                                                                                                            |
| 59 |                                                           |     |                                                                                                                                                                                                                                                                                                                                                                                                            |
| 60 |                                                           |     |                                                                                                                                                                                                                                                                                                                                                                                                            |

|   |             |    |                                                |      |
|---|-------------|----|------------------------------------------------|------|
| 1 |             |    |                                                |      |
| 2 | Sample size | 14 | Estimated number of participants needed to     | P12  |
| 3 |             |    | achieve study objectives and how it was        |      |
| 4 |             |    | determined, including clinical and statistical |      |
| 5 |             |    | assumptions supporting any sample size         |      |
| 6 |             |    | calculations                                   |      |
| 7 |             |    |                                                |      |
| 8 | Recruitment | 15 | Strategies for achieving adequate participant  | P6-7 |
| 9 |             |    | enrolment to reach target sample size          |      |

### Methods: Assignment of interventions (for controlled trials)

#### Allocation:

|    |                |     |                                                        |    |
|----|----------------|-----|--------------------------------------------------------|----|
| 15 |                |     |                                                        |    |
| 16 | Sequence       | 16a | Method of generating the allocation sequence (eg,      | P7 |
| 17 | generation     |     | computer-generated random numbers), and list of        |    |
| 18 |                |     | any factors for stratification. To reduce              |    |
| 19 |                |     | predictability of a random sequence, details of any    |    |
| 20 |                |     | planned restriction (eg, blocking) should be           |    |
| 21 |                |     | provided in a separate document that is                |    |
| 22 |                |     | unavailable to those who enrol participants or         |    |
| 23 |                |     | assign interventions                                   |    |
| 24 |                |     |                                                        |    |
| 25 |                |     |                                                        |    |
| 26 | Allocation     | 16b | Mechanism of implementing the allocation               | P7 |
| 27 | concealment    |     | sequence (eg, central telephone; sequentially          |    |
| 28 | mechanism      |     | numbered, opaque, sealed envelopes), describing        |    |
| 29 |                |     | any steps to conceal the sequence until                |    |
| 30 |                |     | interventions are assigned                             |    |
| 31 |                |     |                                                        |    |
| 32 |                |     |                                                        |    |
| 33 | Implementation | 16c | Who will generate the allocation sequence, who         | P7 |
| 34 |                |     | will enrol participants, and who will assign           |    |
| 35 |                |     | participants to interventions                          |    |
| 36 |                |     |                                                        |    |
| 37 |                |     |                                                        |    |
| 38 | Blinding       | 17a | Who will be blinded after assignment to                | P7 |
| 39 | (masking)      |     | interventions (eg, trial participants, care providers, |    |
| 40 |                |     | outcome assessors, data analysts), and how             |    |
| 41 |                |     |                                                        |    |
| 42 |                | 17b | If blinded, circumstances under which unblinding is    | P7 |
| 43 |                |     | permissible, and procedure for revealing a             |    |
| 44 |                |     | participant's allocated intervention during the trial  |    |
| 45 |                |     |                                                        |    |

### Methods: Data collection, management, and analysis

|    |                 |     |                                                        |     |
|----|-----------------|-----|--------------------------------------------------------|-----|
| 47 |                 |     |                                                        |     |
| 48 |                 |     |                                                        |     |
| 49 | Data collection | 18a | Plans for assessment and collection of outcome,        | P13 |
| 50 | methods         |     | baseline, and other trial data, including any related  |     |
| 51 |                 |     | processes to promote data quality (eg, duplicate       |     |
| 52 |                 |     | measurements, training of assessors) and a             |     |
| 53 |                 |     | description of study instruments (eg,                  |     |
| 54 |                 |     | questionnaires, laboratory tests) along with their     |     |
| 55 |                 |     | reliability and validity, if known. Reference to where |     |
| 56 |                 |     | data collection forms can be found, if not in the      |     |
| 57 |                 |     | protocol                                               |     |
| 58 |                 |     |                                                        |     |
| 59 |                 |     |                                                        |     |
| 60 |                 |     |                                                        |     |

|    |                                 |     |                                                        |        |
|----|---------------------------------|-----|--------------------------------------------------------|--------|
| 1  |                                 |     |                                                        |        |
| 2  |                                 | 18b | Plans to promote participant retention and             | P13    |
| 3  |                                 |     | complete follow-up, including list of any outcome      |        |
| 4  |                                 |     | data to be collected for participants who              |        |
| 5  |                                 |     | discontinue or deviate from intervention protocols     |        |
| 6  |                                 |     |                                                        |        |
| 7  | Data                            | 19  | Plans for data entry, coding, security, and storage,   | P13    |
| 8  | management                      |     | including any related processes to promote data        |        |
| 9  |                                 |     | quality (eg, double data entry; range checks for       |        |
| 10 |                                 |     | data values). Reference to where details of data       |        |
| 11 |                                 |     | management procedures can be found, if not in the      |        |
| 12 |                                 |     | protocol                                               |        |
| 13 |                                 |     |                                                        |        |
| 14 |                                 |     |                                                        |        |
| 15 | Statistical                     | 20a | Statistical methods for analysing primary and          | P12-13 |
| 16 | methods                         |     | secondary outcomes. Reference to where other           |        |
| 17 |                                 |     | details of the statistical analysis plan can be found, |        |
| 18 |                                 |     | if not in the protocol                                 |        |
| 19 |                                 |     |                                                        |        |
| 20 |                                 |     |                                                        |        |
| 21 |                                 | 20b | Methods for any additional analyses (eg, subgroup      | P12-13 |
| 22 |                                 |     | and adjusted analyses)                                 |        |
| 23 |                                 |     |                                                        |        |
| 24 |                                 | 20c | Definition of analysis population relating to protocol | P12-13 |
| 25 |                                 |     | non-adherence (eg, as randomised analysis), and        |        |
| 26 |                                 |     | any statistical methods to handle missing data (eg,    |        |
| 27 |                                 |     | multiple imputation)                                   |        |
| 28 |                                 |     |                                                        |        |
| 29 |                                 |     |                                                        |        |
| 30 | <b>Methods: Monitoring</b>      |     |                                                        |        |
| 31 |                                 |     |                                                        |        |
| 32 | Data monitoring                 | 21a | Composition of data monitoring committee (DMC);        | P13    |
| 33 |                                 |     | summary of its role and reporting structure;           |        |
| 34 |                                 |     | statement of whether it is independent from the        |        |
| 35 |                                 |     | sponsor and competing interests; and reference to      |        |
| 36 |                                 |     | where further details about its charter can be         |        |
| 37 |                                 |     | found, if not in the protocol. Alternatively, an       |        |
| 38 |                                 |     | explanation of why a DMC is not needed                 |        |
| 39 |                                 |     |                                                        |        |
| 40 |                                 |     |                                                        |        |
| 41 |                                 | 21b | Description of any interim analyses and stopping       | NA     |
| 42 |                                 |     | guidelines, including who will have access to these    |        |
| 43 |                                 |     | interim results and make the final decision to         |        |
| 44 |                                 |     | terminate the trial                                    |        |
| 45 |                                 |     |                                                        |        |
| 46 |                                 |     |                                                        |        |
| 47 | Harms                           | 22  | Plans for collecting, assessing, reporting, and        | NA     |
| 48 |                                 |     | managing solicited and spontaneously reported          |        |
| 49 |                                 |     | adverse events and other unintended effects of         |        |
| 50 |                                 |     | trial interventions or trial conduct                   |        |
| 51 |                                 |     |                                                        |        |
| 52 |                                 |     |                                                        |        |
| 53 | Auditing                        | 23  | Frequency and procedures for auditing trial            | NA     |
| 54 |                                 |     | conduct, if any, and whether the process will be       |        |
| 55 |                                 |     | independent from investigators and the sponsor         |        |
| 56 |                                 |     |                                                        |        |
| 57 |                                 |     |                                                        |        |
| 58 | <b>Ethics and dissemination</b> |     |                                                        |        |
| 59 |                                 |     |                                                        |        |
| 60 |                                 |     |                                                        |        |

|    |                 |     |                                                        |         |
|----|-----------------|-----|--------------------------------------------------------|---------|
| 1  |                 |     |                                                        |         |
| 2  | Research ethics | 24  | Plans for seeking research ethics                      | P13-P14 |
| 3  | approval        |     | committee/institutional review board (REC/IRB)         |         |
| 4  |                 |     | approval                                               |         |
| 5  |                 |     |                                                        |         |
| 6  | Protocol        | 25  | Plans for communicating important protocol             | NA      |
| 7  | amendments      |     | modifications (eg, changes to eligibility criteria,    |         |
| 8  |                 |     | outcomes, analyses) to relevant parties (eg,           |         |
| 9  |                 |     | investigators, REC/IRBs, trial participants, trial     |         |
| 10 |                 |     | registries, journals, regulators)                      |         |
| 11 |                 |     |                                                        |         |
| 12 |                 |     |                                                        |         |
| 13 | Consent or      | 26a | Who will obtain informed consent or assent from        | P6-7    |
| 14 | assent          |     | potential trial participants or authorised surrogates, |         |
| 15 |                 |     | and how (see Item 32)                                  |         |
| 16 |                 |     |                                                        |         |
| 17 |                 |     |                                                        |         |
| 18 |                 | 26b | Additional consent provisions for collection and use   | NA      |
| 19 |                 |     | of participant data and biological specimens in        |         |
| 20 |                 |     | ancillary studies, if applicable                       |         |
| 21 |                 |     |                                                        |         |
| 22 | Confidentiality | 27  | How personal information about potential and           | P13     |
| 23 |                 |     | enrolled participants will be collected, shared, and   |         |
| 24 |                 |     | maintained in order to protect confidentiality         |         |
| 25 |                 |     | before, during, and after the trial                    |         |
| 26 |                 |     |                                                        |         |
| 27 |                 |     |                                                        |         |
| 28 | Declaration of  | 28  | Financial and other competing interests for            | P15     |
| 29 | interests       |     | principal investigators for the overall trial and each |         |
| 30 |                 |     | study site                                             |         |
| 31 |                 |     |                                                        |         |
| 32 | Access to data  | 29  | Statement of who will have access to the final trial   | P16     |
| 33 |                 |     | dataset, and disclosure of contractual agreements      |         |
| 34 |                 |     | that limit such access for investigators               |         |
| 35 |                 |     |                                                        |         |
| 36 |                 |     |                                                        |         |
| 37 | Ancillary and   | 30  | Provisions, if any, for ancillary and post-trial care, | NA      |
| 38 | post-trial care |     | and for compensation to those who suffer harm          |         |
| 39 |                 |     | from trial participation                               |         |
| 40 |                 |     |                                                        |         |
| 41 | Dissemination   | 31a | Plans for investigators and sponsor to                 | P14     |
| 42 | policy          |     | communicate trial results to participants,             |         |
| 43 |                 |     | healthcare professionals, the public, and other        |         |
| 44 |                 |     | relevant groups (eg, via publication, reporting in     |         |
| 45 |                 |     | results databases, or other data sharing               |         |
| 46 |                 |     | arrangements), including any publication               |         |
| 47 |                 |     | restrictions                                           |         |
| 48 |                 |     |                                                        |         |
| 49 |                 |     |                                                        |         |
| 50 |                 |     |                                                        |         |
| 51 |                 | 31b | Authorship eligibility guidelines and any intended     | P14     |
| 52 |                 |     | use of professional writers                            |         |
| 53 |                 |     |                                                        |         |
| 54 |                 | 31c | Plans, if any, for granting public access to the full  | P14     |
| 55 |                 |     | protocol, participant-level dataset, and statistical   |         |
| 56 |                 |     | code                                                   |         |
| 57 |                 |     |                                                        |         |

## Appendices

|                                                                                                                                                                                                                                                                                                                                                             |                            |    |                                                                                                                                                                                                |                        |
|-------------------------------------------------------------------------------------------------------------------------------------------------------------------------------------------------------------------------------------------------------------------------------------------------------------------------------------------------------------|----------------------------|----|------------------------------------------------------------------------------------------------------------------------------------------------------------------------------------------------|------------------------|
| 1<br>2<br>3<br>4<br>5<br>6<br>7<br>8<br>9<br>10<br>11<br>12<br>13<br>14<br>15<br>16<br>17<br>18<br>19<br>20<br>21<br>22<br>23<br>24<br>25<br>26<br>27<br>28<br>29<br>30<br>31<br>32<br>33<br>34<br>35<br>36<br>37<br>38<br>39<br>40<br>41<br>42<br>43<br>44<br>45<br>46<br>47<br>48<br>49<br>50<br>51<br>52<br>53<br>54<br>55<br>56<br>57<br>58<br>59<br>60 | Informed consent materials | 32 | Model consent form and other related documentation given to participants and authorised surrogates                                                                                             | See supplementary file |
|                                                                                                                                                                                                                                                                                                                                                             | Biological specimens       | 33 | Plans for collection, laboratory evaluation, and storage of biological specimens for genetic or molecular analysis in the current trial and for future use in ancillary studies, if applicable | NA                     |

---

\*It is strongly recommended that this checklist be read in conjunction with the SPIRIT 2013 Explanation & Elaboration for important clarification on the items. Amendments to the protocol should be tracked and dated. The SPIRIT checklist is copyrighted by the SPIRIT Group under the Creative Commons "[Attribution-NonCommercial-NoDerivs 3.0 Unported](https://creativecommons.org/licenses/by-nc-nd/3.0/)" license.

or peer review only

# BMJ Open

## Effects of brief family psychoeducation for caregivers of people with schizophrenia in Japan provided by visiting nurses: protocol for a cluster randomised controlled trial

|                                 |                                                                                                                                                                                                                                                                                                                                                                                                                                                                                                                                                                                                                                                                                                                                                                                                                                                                                                                                                                                      |
|---------------------------------|--------------------------------------------------------------------------------------------------------------------------------------------------------------------------------------------------------------------------------------------------------------------------------------------------------------------------------------------------------------------------------------------------------------------------------------------------------------------------------------------------------------------------------------------------------------------------------------------------------------------------------------------------------------------------------------------------------------------------------------------------------------------------------------------------------------------------------------------------------------------------------------------------------------------------------------------------------------------------------------|
| Journal:                        | <i>BMJ Open</i>                                                                                                                                                                                                                                                                                                                                                                                                                                                                                                                                                                                                                                                                                                                                                                                                                                                                                                                                                                      |
| Manuscript ID                   | bmjopen-2019-034425.R2                                                                                                                                                                                                                                                                                                                                                                                                                                                                                                                                                                                                                                                                                                                                                                                                                                                                                                                                                               |
| Article Type:                   | Protocol                                                                                                                                                                                                                                                                                                                                                                                                                                                                                                                                                                                                                                                                                                                                                                                                                                                                                                                                                                             |
| Date Submitted by the Author:   | 02-Mar-2020                                                                                                                                                                                                                                                                                                                                                                                                                                                                                                                                                                                                                                                                                                                                                                                                                                                                                                                                                                          |
| Complete List of Authors:       | Yasuma, Naonori; The University of Tokyo, ;<br>Sato, Sayaka; National Institute of Mental Health, Community mental health and law; NCNP<br>Yamaguchi, Sosei; National Center of Neurology and Psychiatry, Department of Community Mental Health & Law, National Institute of Mental Health<br>Matsunaga, Asami; National Center of Neurology and Psychiatry, Department of Community Mental Health & Law, National Institute of Mental Health<br>Shiozawa, Takuma; National Center of Neurology and Psychiatry, Tachimori, Hisateru; National Center of Neurology and Psychiatry Translational Medical Center<br>Watanabe, Kazuhiro; The University of Tokyo, Department of Mental Health, Graduate School of Medicine<br>Imamura, Kotaro<br>Nishi, Daisuke<br>Fujii, Chiyo; National Center of Neurology and Psychiatry, Department of Community Mental Health & Law, National Institute of Mental Health<br>Kawakami, Norito; The University of Tokyo, Department of Mental Health |
| <b>Primary Subject Heading</b>: | Mental health                                                                                                                                                                                                                                                                                                                                                                                                                                                                                                                                                                                                                                                                                                                                                                                                                                                                                                                                                                        |
| Secondary Subject Heading:      | Mental health                                                                                                                                                                                                                                                                                                                                                                                                                                                                                                                                                                                                                                                                                                                                                                                                                                                                                                                                                                        |
| Keywords:                       | Brief family psychoeducation, schizophrenia, caregivers, visiting nurses                                                                                                                                                                                                                                                                                                                                                                                                                                                                                                                                                                                                                                                                                                                                                                                                                                                                                                             |
|                                 |                                                                                                                                                                                                                                                                                                                                                                                                                                                                                                                                                                                                                                                                                                                                                                                                                                                                                                                                                                                      |

SCHOLARONE™  
Manuscripts



I, the Submitting Author has the right to grant and does grant on behalf of all authors of the Work (as defined in the below author licence), an exclusive licence and/or a non-exclusive licence for contributions from authors who are: i) UK Crown employees; ii) where BMJ has agreed a CC-BY licence shall apply, and/or iii) in accordance with the terms applicable for US Federal Government officers or employees acting as part of their official duties; on a worldwide, perpetual, irrevocable, royalty-free basis to BMJ Publishing Group Ltd ("BMJ") its licensees and where the relevant Journal is co-owned by BMJ to the co-owners of the Journal, to publish the Work in this journal and any other BMJ products and to exploit all rights, as set out in our [licence](#).

The Submitting Author accepts and understands that any supply made under these terms is made by BMJ to the Submitting Author unless you are acting as an employee on behalf of your employer or a postgraduate student of an affiliated institution which is paying any applicable article publishing charge ("APC") for Open Access articles. Where the Submitting Author wishes to make the Work available on an Open Access basis (and intends to pay the relevant APC), the terms of reuse of such Open Access shall be governed by a Creative Commons licence – details of these licences and which [Creative Commons](#) licence will apply to this Work are set out in our licence referred to above.

Other than as permitted in any relevant BMJ Author's Self Archiving Policies, I confirm this Work has not been accepted for publication elsewhere, is not being considered for publication elsewhere and does not duplicate material already published. I confirm all authors consent to publication of this Work and authorise the granting of this licence.



1  
2  
3  
4  
5  
6 **1 Effects of brief family psychoeducation for caregivers of people with**  
7 **2 schizophrenia in Japan provided by visiting nurses: protocol for a**  
8 **3 cluster randomised controlled trial**  
9  
10  
11

12 5 Naonori Yasuma<sup>1,2</sup>: nnyy712@gmail.com

13 6 Sayaka Sato<sup>2</sup>: sayakas@ncnp.go.jp

14 7 Sosei Yamaguchi<sup>2</sup>: sosei.yama@ncnp.go.jp

15 8 Asami Matsunaga<sup>2</sup>: asamim@ncnp.go.jp

16 9 Takuma Shiozawa<sup>2</sup>: takuma-shozw@umin.ac.jp

17 10 Hisateru Tachimori<sup>3</sup>: tachi@ncnp.go.jp

18 11 Kazuhiro Watanabe<sup>1</sup>: kzwatanabe-tky@umin.ac.jp

19 12 Kotaro Imamura<sup>1</sup>: kouima-tky@umin.ac.jp

20 13 Daisuke Nishi<sup>1</sup>: d-nishi@m.u-tokyo.ac.jp

21 14 Chiyo Fujii<sup>2</sup>: chyfujii@ncnp.go.jp

22 15 Norito Kawakami<sup>1</sup>: nkawakami@m.u-tokyo.ac.jp

23 16  
24  
25  
26  
27  
28  
29  
30 17 1 Department of Graduate School of Medicine, The University of Tokyo

31 18  
32  
33 19 2 Department of Community Mental Health and Law, National Institute of Mental  
34 20 Health, National Center of Neurology and Psychiatry, Kodaira, Tokyo, Japan

35 21  
36  
37 22 3 Department of Translational Medical Center, National Institute of Mental Health,  
38 23 National Center of Neurology and Psychiatry, Kodaira, Tokyo, Japan

39 24  
40  
41 25 Corresponding author:

42 26 Naonori Yasuma, MD

43 27 Department of Mental Health, Graduate School of Medicine, The University of Tokyo,  
44 28 7-3-1 Hongo, Bunkyo-ku, Tokyo 1130033 Japan

45 29 E-mail: nnyy712@gmail.com

46 30 Phone: +81-3-5841-3521

47 31 Fax: +81-3-5841-3521

48 32  
49 33 Word count: 6,266 words

## 1 **ABSTRACT**

### 2 **Introduction**

3 Development of a support system for families caring for people with schizophrenia in  
4 routine psychiatric care settings is an important issue worldwide. Regional mental  
5 health systems are inadequate for delivering effective services to such family members.  
6 Despite evidence that family psychoeducation (FPE) alleviates the burden of  
7 schizophrenia on families, its dissemination in routine clinical practice remains  
8 insufficient, suggesting the need for developing an effective and implementable  
9 intervention for family caregivers in the existing mental health system setting. In Japan,  
10 the visiting nurse service system would be a practical way of providing family services.  
11 Visiting nurses in local communities are involved in the everyday lives of people with  
12 schizophrenia and their families. Accordingly, they understand their needs and are able  
13 to provide family support as a service covered by national health insurance. The purpose  
14 of this study is to discover whether a brief FPE program provided by visiting nurses  
15 caring for people with schizophrenia will alleviate family burden through a cluster  
16 randomised controlled trial (cRCT).

### 18 **Methods and analysis**

19 The study will be a two-arm, parallel-group (a visiting nurse agency) cRCT. Forty-  
20 seven visiting nurse agencies will be randomly allocated to the brief FPE group  
21 (intervention group) or treatment as usual group (control group). Caregivers of people  
22 with schizophrenia will be recruited by visiting nurses using a randomly ordered list.  
23 The primary outcome will be caregiver burden, measured using the Zarit Burden  
24 Interview–Japanese version (ZBI-22). Outcome assessments will be conducted at  
25 baseline, at 1-month follow-up, and at 6-month follow-up. Multiple levels of three-way  
26 interaction of mixed models will be conducted to examine whether the brief FPE  
27 program will alleviate the burden on caregivers relative to treatment as usual.

### 29 **Ethics and dissemination**

30 The Research Ethics Committee of the Graduate School of Medicine and Faculty of  
31 Medicine, the University of Tokyo, Japan (No. 2019065NI) approved this study. The  
32 results will be published in a scientific peer-reviewed journal.

### 34 **Registration number**

35 UMIN000038044; Pre-results.

## Strengths and Limitations

- This study will evaluate an implementable brief family psychoeducation (FPE) program that potentially reduces time, cost, and staffing problems by incorporating the program into an existing mental health service system, namely visiting nurse services.
- The study incorporated a variety of viewpoints from caregivers, visiting nurses, and FPE experts based on the concept of coproduction and Patient and Public Involvement (PPI).
- One study limitation is that all outcomes will be based on self-reports, which may cause information bias or random error.

## 1 INTRODUCTION

2 Families caring for people with schizophrenia receiving community-based mental health  
3 care have a great need for support. People with schizophrenia who have severe  
4 symptoms require long-term care, which imposes a significant burden on families  
5 providing such care.<sup>1</sup> For example, the financial burden on the family is severe because  
6 considerable amounts of time are devoted to caregiving, resulting in the loss of work  
7 opportunities and reduced income.<sup>2</sup> Moreover, insufficient downtime to recover from  
8 the stress of caregiving results in both physical and mental illnesses.<sup>3</sup> Families also  
9 become worn out and stressed by the demands of coping with this illness, which is  
10 characterized by repeated hallucinations and delusions if symptoms do not stabilize.<sup>4</sup>  
11 Furthermore, a parent of a schizophrenic son or daughter might worry about what will  
12 become of their child after his or her death. They might also feel they are not getting  
13 adequate information about what social services are available to them.<sup>5</sup> Stigma against  
14 the illness is also deeply rooted and can lead to families becoming socially isolated.<sup>3</sup>  
15 Therefore, families of people with schizophrenia have various physical, psychological,  
16 economic, and social burdens.

17 Several studies have addressed the development and evaluation of effective  
18 family interventions. According to a systematic review, family psychoeducation (FPE)  
19 is a scientifically effective psychological intervention that has been used to reduce  
20 caregiver burden.<sup>6,7</sup> The components of FPE mainly include information sharing about  
21 the disorder, early warning signs, and relapse prevention as well as and skills training in  
22 coping, communication, and problem solving.<sup>8</sup> FPE can directly improve caregivers'  
23 knowledge about schizophrenia and related caregiving problems.<sup>9</sup> Improved knowledge  
24 of coping strategies and resources can lead to a more positive appraisal of caregiving  
25 experiences by families as well as caregivers' own self-efficacy in coping with the  
26 demands of caring for people with schizophrenia, thereby lessening the burden.<sup>6</sup>

27 Despite the accumulation of evidence, there are several barriers to FPE  
28 implementation. The initial report on the Schizophrenia Patient Outcomes Research  
29 Team (PORT) Treatment Recommendations found that FPE was provided to 31.6% of  
30 inpatients and 9.6% of outpatients who could have benefited from it.<sup>10</sup> A nationwide  
31 survey in Japan revealed that the implementation rate for FPE programs at psychiatric  
32 facilities are similarly low: 35.9% in hospitals and 14.5% in outpatient settings.<sup>11</sup> One  
33 challenge in implementing these programs is the length of the intervention. Most studies  
34 have found that such interventions range from 9 months to 2 years, which is impractical  
35 for medical staff and families in a clinical setting.<sup>12</sup> Other reasons include funding and  
36 staff shortages, as well as providing necessary training.<sup>13</sup> In Japan, even if healthcare

1 professionals perform FPE for a family, they cannot obtain medical expenses. In  
2 addition, while the Meriden Family Program appears to be effective, training is time-  
3 consuming and expensive.<sup>14</sup> The medical treatment fee system in most countries  
4 including Japan does not cover such a comprehensive family intervention. The  
5 development of a brief and implementable FPE program within the existing mental  
6 health system that is covered by national health insurance is greatly needed.<sup>15</sup>

7 Brief FPE programs have been examined in previous studies. In terms of the  
8 program framework, studies have found that brief FPE programs, delivered in five  
9 sessions or fewer or lasting no more than 3 months, were easy to conduct for both  
10 practitioners and caregivers.<sup>16</sup> Brief FPE programs have been shown to significantly  
11 increase caregivers' knowledge of the disorder, leading to reductions in relapse and  
12 rehospitalisation rates in diverse settings.<sup>17,18</sup> In addition, recent research has shown that  
13 a brief FPE program may be beneficial in reducing caregiver burden. In a pre-post test  
14 in India, a brief FPE program comprised of three 1-hour sessions aimed at educating the  
15 primary caregiver and patient about schizophrenia and imparting communication and  
16 problem-solving skills. A significant decrease in caregiver burden, measured using the  
17 Burden Assessment Scale (BAS), was found between baseline and the final follow-up at  
18 3 months.<sup>19</sup> In a randomised controlled trial in Iran, brief FPE consisted of ten 90-  
19 minute sessions held over 5 weeks (two sessions each week) conducted by a psychiatric  
20 nurse or psychiatrist. Caregiver burden measured using the Family Burden Scale (FBS)  
21 was significantly reduced both immediately after the intervention and 1 month later.<sup>20</sup>  
22 However, the effects of brief FPE programs are still inconclusive due to relatively low  
23 methodological quality in prior studies.<sup>7,16</sup> In other words, evidence from a trial with a  
24 better design is needed.

25 Practical implementation strategies for a brief FPE program need to be  
26 considered in addition to a scientific evaluation of the effects. Brief FPE programs  
27 provided by visiting nurses appear to be a potentially feasible and sustainable way of  
28 implementing FPE in a Japanese clinical setting. Visiting nurses routinely visit clients  
29 with schizophrenia and their family members. They have already built rapport with  
30 clients and family members and would be able to respond according to their needs,  
31 which means they could seamlessly provide highly individualized brief FPE.<sup>21</sup> In  
32 addition, the system of visiting nurses could easily be applied because the number of  
33 visiting nurses has been increasing recently in Japan. From a cost perspective, it would  
34 be possible to make family support a reimbursable service under national health  
35 insurance to cover psychiatric visiting nurse consultancy fees.<sup>22</sup> Taken together, brief

1 FPE provided by visiting nurses could overcome the poor implementation rate and  
2 become effective family interventions in the community setting in Japan.

### 3 4 **Hypothesis and aims**

5 We hypothesise that brief FPE provided by visiting nurses could alleviate the burden on  
6 families and caregivers of people with schizophrenia. The aim of this study is to clarify  
7 whether visiting nurses providing brief FPE to families caring for people with  
8 schizophrenia alleviates family burden through a cluster randomised controlled trial  
9 (cRCT).

## 10 11 **METHODS AND ANALYSIS**

### 12 **Trial design**

13 This study is a two-arm, parallel-group cRCT. The randomisation procedure will be  
14 conducted at the cluster level (visiting nurse agencies). Visiting nurse agencies will be  
15 randomly assigned to the intervention or control (treatment as usual (TAU)) group in a  
16 1:1 ratio. Data will be collected at the individual level. Analyses to evaluate the efficacy  
17 of the intervention program will be conducted at the individual level, taking into  
18 consideration cluster-level effects. The study protocol was registered in the University  
19 Hospital Medical Information Network (UMIN) Clinical Trials Registry (UMIN-CTR  
20 ID, UMIN000038044). This protocol has been reported according to the Standard  
21 Protocol Items: Recommendations for Interventional Trials (SPIRIT) guidelines.<sup>23</sup> The  
22 anticipated trial start date will be 18 September 2019 and the date of last follow-up will  
23 be 31 May 2020.

### 24 25 **Setting and site selection at the cluster level**

26 Figure 1 shows the participant flow chart for this study. The corresponding author (NY)  
27 explained the purpose of this study to 68 visiting nurse agencies in four prefectures in  
28 Japan (Tokyo, Saitama, Kanagawa, and Chiba) through the organisation. Forty-seven  
29 visiting nurse agencies agreed to participate in the study. All the participating visiting  
30 nurse agencies are managed by one organisation.

31 To be included, a visiting nurse agency must provide services mostly to  
32 psychiatric patients or clients, not elderly people or those with physical diseases. In each  
33 agency, visiting nurses care for at least two people with schizophrenia who live with  
34 their family. There are no exclusion criteria at the cluster level.

### 35 36 **Randomisation at the cluster level**

1  
2  
3  
4  
5  
6 1 Visiting nurse agencies that meet the inclusion criteria will be randomly allocated to the  
7 2 intervention group (brief FPE program) or the control group. Randomisation will be  
8 3 stratified by the median of the average caseload of visiting nurses in each agency. We  
9 4 used stratified randomisation based on this factor because the number of patients for  
10 5 whom a visiting nurse can maintain service quality is generally fixed.<sup>24</sup> If a visiting  
11 6 nurse has too many patients, family support will probably be neglected. A random  
12 7 sequence table will be created by a researcher (HT) in another department at our  
13 8 institution who is not involved in the study protocol development process. In addition,  
14 9 another independent researcher (SY) who is not involved in intervention and analysis  
15 10 will conduct the randomisation. SY will inform each visiting nurse agency of the  
16 11 randomisation results. The primary investigator (NY) will be blinded through the entire  
17 12 randomisation process.  
18 13

#### 14 **Participant eligibility criteria and recruitment procedure at the individual level**

15 At the individual level, we set the following inclusion criteria for a caregiver of a person  
16 17 with schizophrenia: 1) is the primary caregiver; 2) aged over 20 years; 3) is a family  
18 19 member of the person with schizophrenia such as a parent, sibling, spouse, or child; and  
20 21 4) lives with the person with schizophrenia. There are no exclusion criteria for  
22 23 caregivers. In addition, the inclusion criteria for people with schizophrenia are as  
24 25 follows: 1) diagnosis of schizophrenia based on the International Statistical  
26 27 Classification of Diseases and Related Health Problems, 10th revision and 2) receiving  
28 29 services from visiting nurses.

30 31 As part of the recruitment procedure at the individual level, all potential  
32 33 participants (caregivers of people with schizophrenia and people with schizophrenia) at  
34 35 each agency will be listed. Second, a randomly ordered list will be created using a  
36 37 random number generator in the Stata statistical software program, version 15, in order  
38 39 to avoid selection bias at the individual level. Third, visiting nurses who have attended a  
40 41 lecture on study design and ethical considerations will recruit participants in accordance  
42 43 with the randomly ordered list until five participants have been recruited. The study will  
44 45 include only participants who voluntarily agree to participate in the study.  
46 47  
48 49  
50 51

#### 52 **Intervention program**

53 54 The intervention program is a single-family intervention conducted by psychiatric  
55 56 visiting nurses. It is based on the Family Intervention and Support in Schizophrenia: A  
57 58 Manual on Family Intervention for the Mental Health Professional.<sup>25</sup> This program was  
59 60 developed through discussions and collaborations among members of the Family



1  
2  
3  
4  
5  
6  
7  
8  
9  
10  
11  
12  
13  
14  
15  
16  
17  
18  
19  
20  
21  
22  
23  
24  
25  
26  
27  
28  
29  
30  
31  
32  
33  
34  
35  
36  
37  
38  
39  
40  
41  
42  
43  
44  
45  
46  
47  
48  
49  
50  
51  
52  
53  
54  
55  
56  
57  
58  
59  
60

1 Association of Schizophrenia, psychiatric visiting nurses, FPE experts, psychiatrists,  
2 psychiatric nurses, clinical psychologists, and mental health social workers based on the  
3 concept of coproduction and Patient and Public Involvement (PPI).<sup>26</sup> During the  
4 development process, we tried to avoid long sentences, enlarged the characters, and  
5 used visually appealing drawings. The program consists of four sessions that last 60  
6 minutes each using the above tool. It will be completed over a period of a month.  
7 Attendance of at least one session is required. Psychiatric visiting nurses will provide  
8 appropriate information using this intervention tool and advice to the family about  
9 living problems based on their own nursing clinical experience. We will also create a  
10 checklist to confirm how many sessions visiting nurses are actually able to conduct with  
11 participants.

12 Before the intervention, we will provide the intervention team of psychiatric  
13 visiting nurses with a 1-day lecture. The lecture will consist of three parts. First, a  
14 caregiver of a person with schizophrenia will talk about their life problems and what  
15 they want visiting nurses to do; this is expected to increase the motivation of visiting  
16 nurses. Second, basic communication training will be conducted through role-playing.  
17 Visiting nurses, who will be brief FPE providers, will be in groups of three. They will  
18 each play the role of a visiting nurse, caregiver, and evaluator. They will practice  
19 listening to caregivers. Third, the primary investigator (NY) will equip them with basic  
20 knowledge about FPE and explain the contents of this intervention tool and the points  
21 the primary investigator wants to emphasise. Through these trainings, we expect to  
22 improve the motivation, knowledge, and skills of the visiting nurses in providing the  
23 brief FPE program.

24 Table 1 shows the contents of the intervention tool. Session I will cover general  
25 knowledge about schizophrenia: definition, causes, symptoms, prognosis,  
26 pharmacological treatment, and psychosocial rehabilitation. Regarding definition and  
27 causes, visiting nurses will stress that schizophrenia is a brain disease that can manifest  
28 in anyone using the diathesis-stress model and the dopamine hypothesis. It is important  
29 to provide the family with a biological explanation about the aetiology of schizophrenia  
30 because there might be family members who think people become schizophrenic  
31 because of family relationships.<sup>27</sup> In addition to an explanation of the symptoms  
32 themselves, visiting nurses will describe how people with schizophrenia have  
33 difficulties living their own lives due to their symptoms. Visiting nurses will explain the  
34 disease course such as the prodromal phase, acute phase, and recovery phase. Next,  
35 visiting nurses will explain the characteristics of each phase and what to do during each  
36 phase. In terms of prognosis, visiting nurses will emphasise that schizophrenia is not



1 necessarily a disease with a bad prognosis. In people with their first episode of  
2 schizophrenia, about 70% will have a good intermediate to long-term outcome if they  
3 receive appropriate pharmacological therapy.<sup>28</sup> Concerning medication, visiting nurses  
4 will appreciate the idea that people with schizophrenia usually do not want to take  
5 medication. Visiting nurses will talk about the necessity, safety, and reasons for  
6 adherence to pharmacological therapy. In addition, the side effects of antipsychotic  
7 medications will be described clearly, using relevant pictures. Finally, visiting nurses  
8 will give an outline of psychosocial therapy. At the end, participants will answer  
9 questions with dichotomous answers—“yes” or “no”—to confirm what they have  
10 learned from the session.

11         Session II will deal with how to cope with people with schizophrenia and  
12 problem-solving skills. The contents of this session include how to cope with  
13 hallucinations and delusions; signs of recurrence; how to prevent recurrences; how to  
14 cope when the disease gets worse; what to do with people with schizophrenia when they  
15 stay at home all day; how to respond to people with schizophrenia who do not want to  
16 take their medication; how to respond when domestic violence is imminent, is  
17 occurring, or has occurred; and how to get involved when self-injury or suicide is  
18 suspected. Finally, visiting nurses will explain problem-solving skills. In the routine  
19 clinical setting, the family will work on matters that are causing trouble in daily life  
20 using problem-solving skills.

21         Session III will cover communication and emotions: understanding the feelings  
22 of people with schizophrenia, expressed emotion (EE) theory, basic knowledge and  
23 skills about communication, and a lecture on desirable and undesirable communication  
24 with people with schizophrenia. In the first section, visiting nurses will describe the  
25 importance of understanding that people with schizophrenia are likely to have a  
26 pessimistic view about their future. In the second section on EE theory, visiting nurses  
27 will appreciate that it is natural for a family to have high EE with poor knowledge and  
28 lack of support about mental illness.<sup>29</sup> Of note, visiting nurses will not force family  
29 members to play the role of supporter. When family members hear the explanation of  
30 high EE, many might feel that they are responsible for their burden. Visiting nurses will  
31 emphasise that both families and people with schizophrenia should think about positive  
32 and constructive communication to ensure mutual independence. In the third section on  
33 basic knowledge about communication and the lecture of desirable and undesirable  
34 communication with patients, caregivers will practice conversations using real cases and  
35 will be given time to consider better communication strategies.

1  
2  
3  
4  
5  
6 1 Session IV will focus on the family's recovery. Topics will include thinking about  
7 2 the family's recovery, the importance of living one's own life, taking care of the  
8 3 family's physical and mental health needs, proper stress management, experiences and  
9 4 messages from members of the Family Association, and identifying available social  
10 5 resources in the community. During this session, visiting nurses will stress that people  
11 6 with schizophrenia and family members each have their own lifestyle and individual  
12 7 goals. Visiting nurses will also encourage family members to live their own lives using  
13 8 a variety of social resources instead of only working hard to take care of a person with  
14 9 schizophrenia. In addition, visiting nurses expect that family members will improve  
15 10 their physical and mental health by acquiring knowledge on self-care and stress  
16 11 management skills. Furthermore, visiting nurses will introduce the experiences of three  
17 12 members of the Family Association who have taken care of a person with  
18 13 schizophrenia. It is expected that others' similar experiences will help family members  
19 14 understand that they are not the only people experiencing such a hard time and relieve  
20 15 their feelings of sadness or hopelessness. Finally, visiting nurses will explain the social  
21 16 resources available in the community for family members and confirm the importance  
22 17 of connecting with many supporters around them.  
23 18

### 19 **Control group**

20 Caregivers enrolled in the control group will receive usual care from visiting nurses.  
21 They will be put on a waiting list to receive the same intervention program after  
22 completing the 6-month follow-up assessment. They will not receive any type of  
23 psychoeducation or supportive therapies.  
24

### 25 **Outcomes**

26 Table 2 shows an overview of the outcome measures. Outcome measures will be  
27 assessed at baseline prior to the intervention (T1), immediately after the completion of  
28 the intervention (1-month follow-up, T2), and 6 months after the baseline assessment  
29 (6-month follow-up, T3).  
30

### 31 **Primary outcome for caregivers**

32 Zarit Burden Interview (ZBI-22)

33 ZBI-22 will be used to measure caregiver burden. It consists of 22 items scored on a  
34 five-point Likert scale from 0 (never) to 4 (nearly always), except for the final item on  
35 global burden, which is rated from 0 (not at all) to 4 (extremely). The total score ranges  
36 from 0 to 88, with higher scores indicating higher burden. The Japanese version of ZBI-

22 had a high test-retest reproducibility and internal consistency. Construct validity has also been confirmed.<sup>30</sup>

#### **Secondary outcome for caregivers**

##### **K6**

K6 will be used to measure sub-clinical depression and anxiety disorders as part of a self-administered questionnaire. It consists of six items answered on a five-point Likert scale. Scores range from 0 to 24, with higher scores representing higher degrees of sub-clinical depression and anxiety disorder. The Japanese versions of the K6 have essentially equivalent screening performance as the original English versions.<sup>31</sup>

##### **General Self Efficacy Scale (GSES)**

GSES is a measurement of self-efficacy in daily living. It includes 16 items with dichotomous questions. The higher the score, the better the self-efficacy, in general. GSES had high test-retest reproducibility and internal consistency. Construct validity has been confirmed.<sup>32</sup>

##### **WHO-5**

WHO-5 will be used to measure subjective quality of life based on positive mood (good spirits and relaxation), vitality (being active and waking up fresh and rested), and general interest (being interested in things). It consists of five items rated on a six-point Likert scale. Higher scores mean higher well-being. The Japanese version of WHO-5 has adequate internal consistency. It has been confirmed to have external concurrent validity and external discriminatory validity.<sup>33</sup>

##### **Knowledge of Illness and Drug Inventory (KIDI)**

KIDI will be used to assess knowledge regarding mental illness and the effects of medications on mental illness. There are two sub-scales: 10 items assessing knowledge of mental illness and 10 items assessing knowledge of the effects of antipsychotic drugs. This inventory consists of a self-reported inventory where respondents are asked to select the correct answer from three choices, with higher scores representing greater knowledge. KIDI is frequently used to assess knowledge about mental disorders and treatments in Japan.<sup>34</sup>

#### **Secondary outcomes in people with schizophrenia**

##### **Behavior and Symptom Identification Scale (BASIS-32)**

1  
2  
3  
4  
5  
6  
7  
8  
9  
10  
11  
12  
13  
14  
15  
16  
17  
18  
19  
20  
21  
22  
23  
24  
25  
26  
27  
28  
29  
30  
31  
32  
33  
34  
35  
36  
37  
38  
39  
40  
41  
42  
43  
44  
45  
46  
47  
48  
49  
50  
51  
52  
53  
54  
55  
56  
57  
58  
59  
60

BASIS-32 is a commonly used measure in mental health. It includes 32 items on a five-point Likert scale, where 0 indicates no difficulties and 4 indicates severe difficulties. The scale measures five factors: (1) relation to self and others (seven items); (2) depression/anxiety (six items); (3) everyday life and role functioning (nine items); (4) impulsive and addictive behaviour (six items); and (5) psychosis (four items). Factors 1, 2, 4, and 5 are assessed as the total score divided by the number of items answered (mean score), while factor 3 is assessed based on the highest rating. Internal consistency and construct validity of the Japanese version of BASIS-32 have been demonstrated.<sup>35</sup>

#### WHO-5

WHO-5 is used to measure subjective quality of life based on positive mood (good spirits and relaxation), vitality (being active and waking up fresh and rested), and general interest (being interested in things). WHO-5 comprises five items rated on a six-point Likert scale. Higher scores mean higher well-being. The Japanese version of WHO-5 has adequate internal consistency. It has been confirmed to have external concurrent validity and external discriminatory validity.<sup>33</sup>

#### Hospitalisation by 6-month follow-up

This is a question with a dichotomous answer (yes or no) about whether the patient has been hospitalised during the past 6 months. The answer will be provided by the caregiver at baseline and the 6-month follow-up.

#### Sample size calculation

The sample size required was calculated according to guidelines in the Consolidated Standards of Reporting Trials (CONSORT) for cRCTs,<sup>36</sup> taking into account intra-class correlations (ICCs). The effect size of a brief FPE program for individual caregiver burden was estimated based on a previous pre-post test.<sup>19</sup> The pre-post test concluded that the standardised mean difference (d) of brief FPE on family burden was 0.46. Sample size was estimated as 76 in each arm based on an alpha error probability of 0.05 and power (1- $\beta$ ) of 0.80, using G\*Power version 3.1.9.2.<sup>37 38</sup> cRCTs should be multiplied by design effect (1+[m-1] $\rho$ ), where m is the average cluster size and  $\rho$  is the ICC.<sup>39</sup> The estimated ICC for the primary outcome in this study was set to 0.05 and the average number of caregivers per cluster was set at five people. Assuming an attrition rate of 20%, the required sample size is 110 caregivers in each arm. Thus, at least 44 visiting nurse agencies will be recruited.

## Quantitative analysis

The statistician will be blinded to the treatment group. We will analyse clinical outcomes on the basis of intention to treat and model the effect of the intervention on primary and secondary continuous outcomes using generalised linear latent and mixed models (GLLAMMs). This will allow for missing data to be taken into account within the statistical model. In this study, a three-level model will be used, with repeated measures nested in participants and participants nested in clusters. Time (baseline, 1-month follow-up, 6-month follow-up) will be considered level 1, individual caregivers will be considered level 2, and clusters (visiting nurse agencies) will be considered level 3. Regarding fixed effects, condition (intervention versus control), time, and a two-way interaction effect, condition by time, will be included. Models will adjust for baseline differences in caregiver socio-demographics such as age, gender, education, household income, family relationship with the person with schizophrenia, length of caregiving, and length of visiting nurse system use. Multiple levels of Cox proportional hazards regression models will also be used for the dichotomous question of hospitalisation at the 6-month follow-up. A *p*-value of less than 0.05 will be considered statistically significant.

## Data monitoring

A data monitoring committee (DMC) will be set up. It will consist of at least two independent members. The DMC will meet monthly after the first participant has been randomised. The purpose of the meeting will be to review participation rates and reasons for study dropout. The DMC will be independent from any sponsor and competing interest.

## Patient and public involvement

The research question, study design, and outcome measures were determined based on a discussion with representatives of the Family Association of Schizophrenia. The intervention program was also developed through the discussion and collaboration among members of the Family Association of Schizophrenia, psychiatric visiting nurses, FPE experts, psychiatrists, psychiatric nurses, clinical psychologists, and mental health social workers. After the completion of the study, this intervention tool will be available for anyone who wants to use it via the internet.

## Ethics and dissemination

## 1 Ethical considerations

2 The authors assert that all procedures contributing to this work comply with the ethical  
3 standards of the relevant national and institutional committees on human  
4 experimentation and with the Helsinki Declaration of 1975, as revised in 2008. The  
5 study protocol was approved by the Research Ethics Committee of the Graduate School  
6 of Medicine and the Faculty of Medicine at the University of Tokyo, Japan (No.  
7 2019065NI). We will obtain informed consent from all caregivers and patients. The  
8 consent form will inform caregivers and patients that we guarantee protection of  
9 personal information and that the data will be anonymous and used only for academic  
10 purposes. There are no competing interests. This study is supported by fundamental  
11 study on effective community services for people with severe mental disorders and their  
12 families.

## 14 Dissemination of the research findings

15 The findings will be published in a scientific peer-reviewed journal according to the  
16 CONSORT guidelines for cRCTs.<sup>36</sup> The participants will be informed of conference  
17 presentations and publications.

## 19 **Strengths and limitations**

20 The study has both strengths and limitations. First, the study will evaluate an  
21 implementable brief FPE program that potentially reduces time, cost, and staffing  
22 problems by incorporating the program into an existing mental health service system,  
23 namely visiting nurse services. Second, this is the first cRCT of a brief FPE program,  
24 which could prevent contamination between the intervention and control groups. Third,  
25 based on the concept of coproduction and PPI,<sup>26</sup> the study incorporated a variety of  
26 viewpoints from caregivers, visiting nurses, and FPE experts.

27 We recognise three limitations of this study. First, since the sampling method for  
28 participating agencies was not random, there is a possibility of selection bias. Second,  
29 since subjects will provide data through a self-reported questionnaire, information bias  
30 or random error is possible. For example, the severity of symptoms in people with  
31 schizophrenia that impact a caregiver's burden may not be accurately measured. Third,  
32 we designed the study and intervention based on coproduction, but there are still  
33 concerns about its feasibility in actual clinical settings. For example, participants might  
34 not complete all four sessions due to the condition of people with schizophrenia, family  
35 work, and family hospitalisation. Fourth, due to the short study period, the number of



1 participants may not be able to meet the target sample size. These may lead to a high  
2 attrition rate during implementation.

#### 3 4 **Acknowledgments**

5 The authors would like to thank the members of the *Mokusei* Family Association of  
6 Schizophrenia and N · FIELD Co., Ltd. for their invaluable advice on many aspects of the  
7 project.

#### 8 9 **Contributors**

10 NY is the principal investigator responsible for the initial draft of this manuscript and  
11 organising and implementing the study. NY and KW calculated the sample size. NY,  
12 KW, SY, and MA decided on the analytic strategy. SS, TS, HT, KI, DN, CF, and NK  
13 helped throughout the development of the interventions and gave valuable feedback on  
14 the study protocol. All authors have read and approved the final manuscript.

15  
16 **Funding:** This work is supported by Fundamental study on effective community  
17 services for people with severe mental disorders and their families.

18  
19 **Competing interests:** None declared.

20  
21 **Patient Consent:** Obtained.

22  
23 **Ethics approval:** Research Committee of the Graduate School of Medicine and the  
24 Faculty of Medicine at the University of Tokyo, Japan.

#### 25 26 **REFERENCES**

- 27 1. Awad AG, Voruganti LN. The burden of schizophrenia on caregivers: a review.  
28 *Pharmacoecon Open* 2008;26:149–62. doi:10.2165/00019053-200826020-00005
- 29  
30 2. Saunders JC. Families living with severe mental illness: a literature review. *Issues*  
31 *Ment Health Nurs* 2003;24:175–98. doi:10.1080/01612840305301
- 32  
33 3. Shah AJ, Wadoo O, Latoo J. Psychological distress in carers of people with mental  
34 disorders. *British Journal of Medical Practitioners* 2010;3:a327.

- 1  
2  
3  
4  
5  
6 1 4. Gopinath PA, Chaturvedi S. Distress behaviour of schizophrenics at home. *Acta*  
7 2 *Psychiatr Scand* 1992;86:185–8. doi:10.1111/j.1600-0447.1992.tb03249.x  
8  
9 3
- 10 4 5. McAuliffe R, O'Connor L, Meagher D. Parents' experience of living with and caring  
11 5 for an adult son or daughter with schizophrenia at home in Ireland: a qualitative  
12 6 study. *J Psychiatr Ment Health Nurs* 2014;21:145–53. doi:10.1111/jpm.12065  
13 7  
14 7
- 15 8 6. Sin J, Gillard S, Spain D, *et al.* Effectiveness of psychoeducational interventions for  
16 9 family carers of people with psychosis: a systematic review and meta-analysis. *Clin*  
17 10 *Psychol Rev* 2017;56:13–24. doi:10.1016/j.cpr.2017.05.002  
18 11  
19 11
- 20 12 7. Sin J, Jordan CD, Barley EA, *et al.* Psychoeducation for siblings of people with  
21 13 severe mental illness. *Cochrane Database Syst Rev* 2015;5:Cd010540.  
22 14 doi:10.1002/14651858.CD010540.pub2  
23 15  
24 15
- 25 16 8. Dixon L, McFarlane WR, Lefley H, *et al.* Evidence-based practices for services to  
26 17 families of people with psychiatric disabilities. *Psychiatr Serv* 2001;52:903–10.  
27 18 doi:10.1176/appi.ps.52.7.903  
28 19  
29 19
- 30 20 9. Birchwood M, Smith J, Cochrane R. Specific and non-specific effects of educational  
31 21 intervention for families living with schizophrenia. A comparison of three methods.  
32 22 *Br J Psychiatry* 1992;160:806–14. doi:10.1192/bjp.160.6.806  
33 23  
34 23
- 35 24 10. Lehman AF, Steinwachs DM. Patterns of usual care for schizophrenia: initial results  
36 25 from the Schizophrenia Patient Outcomes Research Team (PORT) Client Survey.  
37 26 *Schizophr Bull* 1998;24:11–20; discussion 20–32.  
38 27 doi:10.1093/oxfordjournals.schbul.a033303  
39 28  
40 28
- 41 29 11. Oshima I, Mino Y, Nakamura Y, *et al.* Implementation and dissemination of family  
42 30 psychoeducation in Japan: nationwide survey on psychiatric hospitals in 1995 and  
43 31 2001. *Journal of Social Policy & Social Work* 2007;11:5–16.  
44 32  
45 32
- 46 33 12. Rummel-Kluge C, Kissling W. Psychoeducation in schizophrenia: new  
47 34 developments and approaches in the field. *Curr Opin Psychiatry* 2008;21:168–72.  
48 35 doi:10.1097/YCO.0b013e3282f4e574  
49 36  
50 36  
51  
52  
53  
54  
55  
56  
57  
58  
59  
60



- 1  
2  
3  
4  
5  
6 1 13. Harvey C. Family psychoeducation for people living with schizophrenia and their  
7 2 families. *BJPsych Adv* 2018;24:9–19. doi:10.1192/bja.2017.4  
8  
9 3  
10 4 14. Fadden G, Heelis R. 2011. The Meriden Family Programme: lessons learned over  
11 5 10 years. *J Ment Health* 2011;20:79–88. doi:10.3109/09638237.2010.492413  
12 6 [published online first: 2 September 2010].  
13 7  
14 8 15. McFarlane WR, Dixon L, Lukens E, *et al.* Family psychoeducation and  
15 9 schizophrenia: a review of the literature. *J Marital Fam Ther* 2003;29:223–45.  
16 10  
17 11 16. Okpokoro U, Adams CE, Sampson S. Family intervention (brief) for schizophrenia.  
18 12 *Cochrane Database Syst Rev* 2014;3:Cd009802.  
19 13 doi:10.1002/14651858.CD009802.pub2  
20 14  
21 15 17. Pitschel-Walz G, Leucht S, Bauml J, *et al.* The effect of family interventions on  
22 16 relapse and rehospitalization in schizophrenia—a meta-analysis. *Schizophr Bull*  
23 17 2001;27:73–92. doi:10.1093/oxfordjournals.schbul.a006861.  
24 18  
25 19 18. Smith JV, Birchwood MJ. Specific and non-specific effects of educational  
26 20 intervention with families living with a schizophrenic relative. *Br J Psychiatry*  
27 21 1987;150:645–52. doi:10.1192/bjp.150.5.645.  
28 22  
29 23 19. Devaramane V, Pai NB, Vella SL. The effect of a brief family intervention on  
30 24 primary carer's functioning and their schizophrenic relatives levels of  
31 25 psychopathology in India. *Asian J Psychiatr* 2011;4:183–7.  
32 26 doi:10.1016/j.ajp.2011.06.004  
33 27  
34 28 20. Sharif F, Shaygan M, Mani A. Effect of a psycho-educational intervention for  
35 29 family members on caregiver burdens and psychiatric symptoms in patients with  
36 30 schizophrenia in Shiraz, Iran. *BMC Psychiatry* 2012;12:48. doi:10.1186/1471-244x-  
37 31 12-48  
38 32  
39 33 21. Huang XY, Ma WF, Shih HH, *et al.* Roles and functions of community mental  
40 34 health nurses caring for people with schizophrenia in Taiwan. *J Clin Nurs*  
41 35 2008;17:3030–40. doi:10.1111/j.1365-2702.2008.02426.x  
42 36  
43  
44  
45  
46  
47  
48  
49  
50  
51  
52  
53  
54  
55  
56  
57  
58  
59  
60

- 1  
2  
3  
4  
5  
6 1 22. Setoya N, Kayama M, Tsunoda A, *et al.* A survey of the family care provided in  
7 2 psychiatric home-visit nursing and related characteristics of clients. *Japanese*  
8 3 *Bulletin of Social Psychiatry* 2011;20:17–25.  
9 4  
10 5  
11 23. Chan AW, Tetzlaff JM, Altman DG, *et al.* SPIRIT 2013 statement: defining  
12 6 standard protocol items for clinical trials. *Ann Intern Med* 2013;158:200–7.  
13 7 doi:10.7326/0003-4819-158-3-201302050-00583  
14 8  
15 9  
16 24. Mueser, K. T., Bond, G. R., Drake, R. E., & Resnick, S. G. (1998). Models of  
17 10 community care for severe mental illness: a review of research on case management.  
18 11 *Schizophr Bull*, 24(1), 37-74. doi:10.1093/oxfordjournals.schbul.a033314  
19 12  
20 13  
21 25. Varghese M, Shah A, Kumar GSU, *et al.* Family intervention and support in  
22 14 schizophrenia: a manual on family intervention for the mental health professional,  
23 15 version 2. Bangalore, India: National Institute of Mental Health and Neurosciences.  
24 16  
25 17  
26 26. Batalden M, Batalden P, Margolis P, *et al.* Coproduction of healthcare service. *BMJ*  
27 18 *Qual Safe* 2016;25:509–17. doi:10.1136/bmjqs-2015-004315  
28 19  
29 20  
30 27. Ferriter M, Huband N. Experiences of parents with a son or daughter suffering from  
31 21 schizophrenia. *J Psychiatr Ment Health Nurs* 2003;10:552–60. doi:10.1046/j.1365-  
32 22 2850.2003.00624.x  
33 23  
34 24  
35 28. Menezes NM, Arenovich T, Zipursky RB. A systematic review of longitudinal  
36 25 outcome studies of first-episode psychosis. *Psychol Med* 2006;36:1349–62.  
37 26 doi:10.1017/s0033291706007951  
38 27  
39 28  
40 29  
41 30  
42 29. Amaresha AC, Venkatasubramanian G. Expressed emotion in schizophrenia: an  
43 31 overview. *Indian J Psychol Med* 2012;34:12–20. doi:10.4103/0253-7176.96149  
44 32  
45 30  
46 31  
47 30  
48 31  
49 32  
50 33  
51 30. Arai Y, Kudo K, Hosokawa T, *et al.* Reliability and validity of the Japanese version  
52 32 of the Zarit Caregiver Burden interview. *Psychiatry Clin Neurosci* 1997;51:281–7.  
53 33 doi:10.1111/j.1440-1819.1997.tb03199.x  
54 34  
55  
56  
57  
58  
59  
60

- 1  
2  
3  
4  
5  
6 1 31. Sakurai K, Nishi A, Kondo K, *et al.* Screening performance of K6/K10 and other  
7 2 screening instruments for mood and anxiety disorders in Japan. *Psychiatry Clin*  
8 3 *Neurosci* 2011;65:434–41. doi:10.1111/j.1440-1819.2011.02236.x  
9 4  
10 5  
11 6 32. Sakano Y, Tohjoh M. The General Self-Efficacy Scale (GSES): scale development  
12 7 and validation. *Japanese Journal of Behavior Therapy* 1986;12:73–82.  
13 8  
14 9 33. Awata S, Bech P, Yoshida S, *et al.* Reliability and validity of the Japanese version  
15 10 of the World Health Organization-Five Well-Being Index in the context of detecting  
16 11 depression in diabetic patients. *Psychiatry Clin Neurosci* 2007;61:112–9.  
17 12 doi:10.1111/j.1440-1819.2007.01619.x  
18 13  
19 14 34. Maeda M, OM, Renri T, *et al.* It is as a result of disease drug knowledge degree  
20 15 investigation (Knowledge of Illness and Drugs Inventory, KIDI) for a person with  
21 16 IIB-29 schizophrenia and the family. *Japanese Bulletin of Social Psychiatry*  
22 17 1994;2:173–4.  
23 18  
24 19 35. Setoya Y, N. Y., Kurita H. Utility of the Japanese version of the BASIS-32 in  
25 20 inpatients in psychiatric hospital. *Japanese Journal of Clinical Psychiatry*  
26 21 2002;31:571–5.  
27 22  
28 23 36. Campbell MK, Piaggio G, Elbourne DR, *et al.* Consort 2010 statement: extension to  
29 24 cluster randomised trials. *BMJ* 2012;345:e5661. doi:10.1136/bmj.e5661  
30 25  
31 26 37. Faul F, Erdfelder E, Buchner A, *et al.* Statistical power analyses using G\*Power 3.1:  
32 27 tests for correlation and regression analyses. *Behav Res Methods* 2009;41:1149–60.  
33 28 doi:10.3758/brm.41.4.1149  
34 29  
35 30 38. Faul F, Erdfelder E, Lang AG, *et al.* G\*Power 3: a flexible statistical power analysis  
36 31 program for the social, behavioral, and biomedical sciences. *Behav Res Methods*  
37 32 2007;39:175–91.  
38 33  
39 34 39. Campbell MK, Elbourne DR, Altman DG. CONSORT statement: extension to  
40 35 cluster randomised trials. *BMJ* 2004;328:702–8. doi:10.1136/bmj.328.7441.702  
41 36  
42  
43  
44  
45  
46  
47  
48  
49  
50  
51  
52  
53  
54  
55  
56  
57  
58  
59  
60

**Table 1. Outline of the brief family psychoeducation program**

| Session number | Session aim                                                             | Content                                                                                                                                                                                                                                                                                                                                                                                                                                                                                                              |
|----------------|-------------------------------------------------------------------------|----------------------------------------------------------------------------------------------------------------------------------------------------------------------------------------------------------------------------------------------------------------------------------------------------------------------------------------------------------------------------------------------------------------------------------------------------------------------------------------------------------------------|
| I              | General knowledge about schizophrenia                                   | Definition, causes, symptoms, prognosis, pharmacological treatment, psychosocial rehabilitation.<br>Activity: Let's review the knowledge gained in this session.                                                                                                                                                                                                                                                                                                                                                     |
| II             | How to cope with people with schizophrenia using problem-solving skills | How to cope with hallucinations and delusions; signs of recurrence and how to prevent recurrence; how to cope when the disease gets worse; what to do with people with schizophrenia when they stay at home all day; how to respond to people with schizophrenia who do not want to take their medication; what to do when domestic violence is imminent, is happening, or has happened; how to get involved when self-injury or suicide is suspected.<br>Activity: Let's learn how to apply problem-solving skills. |
| III            | Handling communication and emotions                                     | Understanding the feelings of people with schizophrenia, expressed emotion theory, basic knowledge about communication, and lecture about desirable and undesirable communication with people with schizophrenia.<br>Activity: Let's practice conversations using real cases.                                                                                                                                                                                                                                        |
| IV             | Family recovery                                                         | Thinking about the family's recovery, importance of living one's own life, taking care of the family's physical and mental health needs, proper stress management, and experiences and messages from members of the Family Association.<br>Activity: Let's identify social resources in the community and recognise the importance of connecting with many supporters around families.                                                                                                                               |

1 **This intervention program consists of four 60-minute modules completed over 1 month.**

2 **Table 2. Outcome measures**

3

4

|    | <b>Outcome measure</b>                               | <b>Baseline</b> | <b>1-month follow-up</b> | <b>6-month follow-up</b> |
|----|------------------------------------------------------|-----------------|--------------------------|--------------------------|
| 5  | Caregivers                                           |                 |                          |                          |
| 6  | Zarit Burden Interview (ZBI-22)                      | ✓               | ✓                        | ✓                        |
| 7  |                                                      |                 |                          |                          |
| 8  | K6                                                   | ✓               | ✓                        | ✓                        |
| 9  |                                                      |                 |                          |                          |
| 10 | General Self-Efficacy Scale (GSES)                   | ✓               | ✓                        | ✓                        |
| 11 |                                                      |                 |                          |                          |
| 12 | WHO-5                                                | ✓               | ✓                        | ✓                        |
| 13 |                                                      |                 |                          |                          |
| 14 | Knowledge of Illness and Drug Inventory (KIDI)       | ✓               | ✓                        | ✓                        |
| 15 |                                                      |                 |                          |                          |
| 16 |                                                      |                 |                          |                          |
| 17 |                                                      |                 |                          |                          |
| 18 |                                                      |                 |                          |                          |
| 19 |                                                      |                 |                          |                          |
| 20 | People with schizophrenia                            |                 |                          |                          |
| 21 | Behavior and Symptom Identification Scale (BASIS-32) | ✓               | ✓                        | ✓                        |
| 22 |                                                      |                 |                          |                          |
| 23 | WHO-5                                                | ✓               | ✓                        | ✓                        |
| 24 |                                                      |                 |                          |                          |
| 25 | Hospitalisation during the past 6 months             | ✓               | –                        | ✓                        |
| 26 |                                                      |                 |                          |                          |
| 27 |                                                      |                 |                          |                          |
| 28 |                                                      |                 |                          |                          |

29

30

31

32

33

34

35

36

37

38

39

40

41

42

43

44

45

46

1  
2  
3  
4  
5  
6  
7  
8  
9  
10  
11  
12  
13  
14  
15  
16  
17  
18  
19  
20  
21  
22  
23  
24  
25  
26  
27  
28  
29  
30  
31  
32  
33  
34  
35  
36  
37  
38  
39  
40  
41  
42  
43  
44  
45  
46

**Figure 1**

For peer review only

Figure 1. Study flow chart

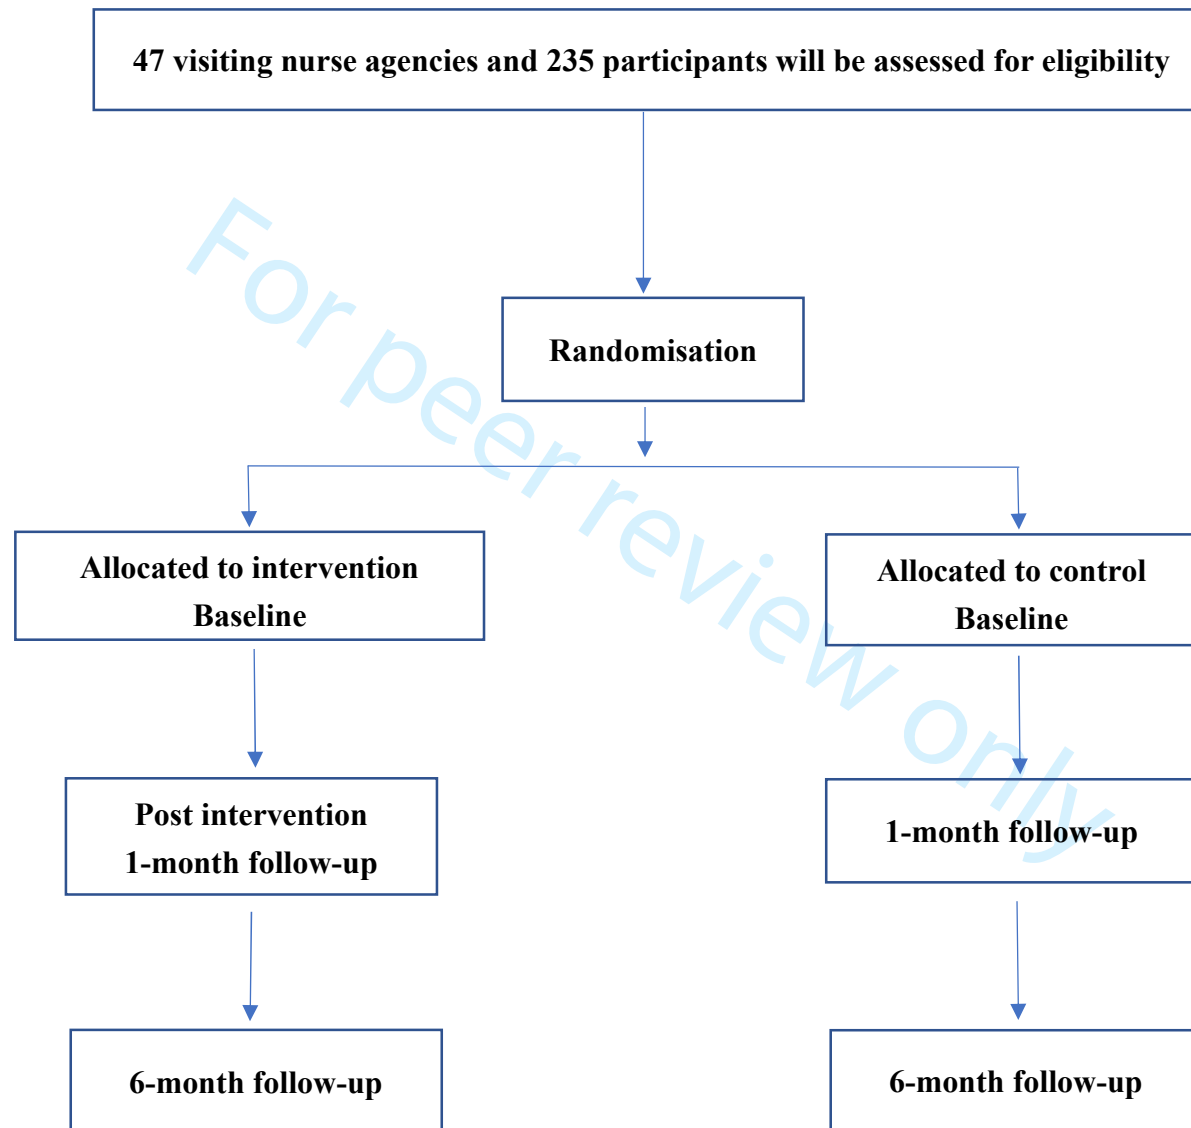

# BMJ Open

## Effects of brief family psychoeducation for caregivers of people with schizophrenia in Japan provided by visiting nurses: protocol for a cluster randomised controlled trial

|                                 |                                                                                                                                                                                                                                                                                                                                                                                                                                                                                                                                                                                                                                                                                                                                                                                                                                                                                                                                                                                                                                                                                                                              |
|---------------------------------|------------------------------------------------------------------------------------------------------------------------------------------------------------------------------------------------------------------------------------------------------------------------------------------------------------------------------------------------------------------------------------------------------------------------------------------------------------------------------------------------------------------------------------------------------------------------------------------------------------------------------------------------------------------------------------------------------------------------------------------------------------------------------------------------------------------------------------------------------------------------------------------------------------------------------------------------------------------------------------------------------------------------------------------------------------------------------------------------------------------------------|
| Journal:                        | <i>BMJ Open</i>                                                                                                                                                                                                                                                                                                                                                                                                                                                                                                                                                                                                                                                                                                                                                                                                                                                                                                                                                                                                                                                                                                              |
| Manuscript ID                   | bmjopen-2019-034425.R3                                                                                                                                                                                                                                                                                                                                                                                                                                                                                                                                                                                                                                                                                                                                                                                                                                                                                                                                                                                                                                                                                                       |
| Article Type:                   | Protocol                                                                                                                                                                                                                                                                                                                                                                                                                                                                                                                                                                                                                                                                                                                                                                                                                                                                                                                                                                                                                                                                                                                     |
| Date Submitted by the Author:   | 23-Mar-2020                                                                                                                                                                                                                                                                                                                                                                                                                                                                                                                                                                                                                                                                                                                                                                                                                                                                                                                                                                                                                                                                                                                  |
| Complete List of Authors:       | Yasuma, Naonori; The University of Tokyo, ;<br>Sato, Sayaka; National Institute of Mental Health, Community mental health and law; NCNP<br>Yamaguchi, Sosei; National Center of Neurology and Psychiatry, Department of Community Mental Health & Law, National Institute of Mental Health<br>Matsunaga, Asami; National Center of Neurology and Psychiatry, Department of Community Mental Health & Law, National Institute of Mental Health<br>Shiozawa, Takuma; National Center of Neurology and Psychiatry, Tachimori, Hisateru; National Center of Neurology and Psychiatry Translational Medical Center<br>Watanabe, Kazuhiro; The University of Tokyo, Department of Mental Health, Graduate School of Medicine<br>Imamura, Kotaro; The University of Tokyo, Department of Graduate School of Medicine<br>Nishi, Daisuke; The University of Tokyo, Department of Graduate School of Medicine<br>Fujii, Chiyo; National Center of Neurology and Psychiatry, Department of Community Mental Health & Law, National Institute of Mental Health<br>Kawakami, Norito; The University of Tokyo, Department of Mental Health |
| <b>Primary Subject Heading</b>: | Mental health                                                                                                                                                                                                                                                                                                                                                                                                                                                                                                                                                                                                                                                                                                                                                                                                                                                                                                                                                                                                                                                                                                                |
| Secondary Subject Heading:      | Mental health                                                                                                                                                                                                                                                                                                                                                                                                                                                                                                                                                                                                                                                                                                                                                                                                                                                                                                                                                                                                                                                                                                                |
| Keywords:                       | Brief family psychoeducation, schizophrenia, caregivers, visiting nurses                                                                                                                                                                                                                                                                                                                                                                                                                                                                                                                                                                                                                                                                                                                                                                                                                                                                                                                                                                                                                                                     |
|                                 |                                                                                                                                                                                                                                                                                                                                                                                                                                                                                                                                                                                                                                                                                                                                                                                                                                                                                                                                                                                                                                                                                                                              |

SCHOLARONE™  
Manuscripts





I, the Submitting Author has the right to grant and does grant on behalf of all authors of the Work (as defined in the below author licence), an exclusive licence and/or a non-exclusive licence for contributions from authors who are: i) UK Crown employees; ii) where BMJ has agreed a CC-BY licence shall apply, and/or iii) in accordance with the terms applicable for US Federal Government officers or employees acting as part of their official duties; on a worldwide, perpetual, irrevocable, royalty-free basis to BMJ Publishing Group Ltd ("BMJ") its licensees and where the relevant Journal is co-owned by BMJ to the co-owners of the Journal, to publish the Work in this journal and any other BMJ products and to exploit all rights, as set out in our [licence](#).

The Submitting Author accepts and understands that any supply made under these terms is made by BMJ to the Submitting Author unless you are acting as an employee on behalf of your employer or a postgraduate student of an affiliated institution which is paying any applicable article publishing charge ("APC") for Open Access articles. Where the Submitting Author wishes to make the Work available on an Open Access basis (and intends to pay the relevant APC), the terms of reuse of such Open Access shall be governed by a Creative Commons licence – details of these licences and which [Creative Commons](#) licence will apply to this Work are set out in our licence referred to above.

Other than as permitted in any relevant BMJ Author's Self Archiving Policies, I confirm this Work has not been accepted for publication elsewhere, is not being considered for publication elsewhere and does not duplicate material already published. I confirm all authors consent to publication of this Work and authorise the granting of this licence.

1  
2  
3  
4  
5  
6 **1 Effects of brief family psychoeducation for caregivers of people with**  
7 **2 schizophrenia in Japan provided by visiting nurses: protocol for a**  
8 **3 cluster randomised controlled trial**  
9  
10  
11

12 5 Naonori Yasuma<sup>1,2</sup>: nnyy712@gmail.com

13 6 Sayaka Sato<sup>2</sup>: sayakas@ncnp.go.jp

14 7 Sosei Yamaguchi<sup>2</sup>: sosei.yama@ncnp.go.jp

15 8 Asami Matsunaga<sup>2</sup>: asamim@ncnp.go.jp

16 9 Takuma Shiozawa<sup>2</sup>: takuma-shozw@umin.ac.jp

17 10 Hisateru Tachimori<sup>3</sup>: tachi@ncnp.go.jp

18 11 Kazuhiro Watanabe<sup>1</sup>: kzwatanabe-tky@umin.ac.jp

19 12 Kotaro Imamura<sup>1</sup>: kouima-tky@umin.ac.jp

20 13 Daisuke Nishi<sup>1</sup>: d-nishi@m.u-tokyo.ac.jp

21 14 Chiyo Fujii<sup>2</sup>: chyfujii@ncnp.go.jp

22 15 Norito Kawakami<sup>1</sup>: nkawakami@m.u-tokyo.ac.jp

23 16  
24  
25  
26  
27  
28  
29  
30 17 1 Department of Graduate School of Medicine, The University of Tokyo

31 18  
32  
33 19 2 Department of Community Mental Health and Law, National Institute of Mental  
34 20 Health, National Center of Neurology and Psychiatry, Kodaira, Tokyo, Japan

35 21  
36  
37 22 3 Department of Translational Medical Center, National Institute of Mental Health,  
38 23 National Center of Neurology and Psychiatry, Kodaira, Tokyo, Japan

39 24  
40  
41 25 Corresponding author:

42 26 Naonori Yasuma, MD

43 27 Department of Mental Health, Graduate School of Medicine, The University of Tokyo,  
44 28 7-3-1 Hongo, Bunkyo-ku, Tokyo 1130033 Japan

45 29 E-mail: nnyy712@gmail.com

46 30 Phone: +81-3-5841-3521

47 31 Fax: +81-3-5841-3521

48 32  
49 33 Word count: 6,261 words

## 1 **ABSTRACT**

### 2 **Introduction**

3 Development of a support system for families caring for people with schizophrenia in  
4 routine psychiatric care settings is an important issue worldwide. Regional mental  
5 health systems are inadequate for delivering effective services to such family members.  
6 Despite evidence that family psychoeducation (FPE) alleviates the burden of  
7 schizophrenia on families, its dissemination in routine clinical practice remains  
8 insufficient, suggesting the need for developing an effective and implementable  
9 intervention for family caregivers in the existing mental health system setting. In Japan,  
10 the visiting nurse service system would be a practical way of providing family services.  
11 Visiting nurses in local communities are involved in the everyday lives of people with  
12 schizophrenia and their families. Accordingly, visiting nurses understand their needs  
13 and are able to provide family support as a service covered by national health insurance.  
14 The purpose of this study is to discover whether a brief FPE program provided by  
15 visiting nurses caring for people with schizophrenia will alleviate family burden  
16 through a cluster randomised controlled trial (cRCT).

17

### 18 **Methods and analysis**

19 The study will be a two-arm, parallel-group (visiting nurse agency) cRCT. Forty-seven  
20 visiting nurse agencies will be randomly allocated to the brief FPE group (intervention  
21 group) or treatment as usual group (control group). Caregivers of people with  
22 schizophrenia will be recruited by visiting nurses using a randomly ordered list. The  
23 primary outcome will be caregiver burden, measured using the Zarit Burden Interview–  
24 Japanese version (ZBI-22). Outcome assessments will be conducted at baseline, 1-  
25 month follow-up, and 6-month follow-up. Multiple levels of three-way interactions in  
26 mixed models will be used to examine whether the brief FPE program will alleviate the  
27 burden on caregivers relative to treatment as usual.

28

### 29 **Ethics and dissemination**

30 The Research Ethics Committee of the Graduate School of Medicine and Faculty of  
31 Medicine, The University of Tokyo, Japan (No. 2019065NI) approved this study. The  
32 results will be published in a scientific peer-reviewed journal.

33

### 34 **Registration number**

35 UMIN000038044; Pre-results.

## Strengths and Limitations

- This study will evaluate an implementable brief family psychoeducation (FPE) program that potentially reduces time, cost, and staffing problems by incorporating the program into an existing mental health service system, namely visiting nurse services.
- The study incorporated a variety of viewpoints from caregivers, visiting nurses, and FPE experts based on the concept of coproduction and Patient and Public Involvement (PPI).
- One study limitation is that all outcomes will be based on self-reports, which may cause information bias or random error.

## 1 INTRODUCTION

2 Families caring for people with schizophrenia receiving community-based mental health  
3 care have a great need for support. People with schizophrenia who have severe  
4 symptoms require long-term care, which imposes a significant burden on families  
5 providing such care.<sup>1</sup> For example, the financial burden on the family is severe because  
6 considerable amounts of time are devoted to caregiving, resulting in the loss of work  
7 opportunities and reduced income.<sup>2</sup> Moreover, insufficient downtime to recover from  
8 the stress of caregiving results in both physical and mental illness.<sup>3</sup> Families also  
9 become worn out and stressed by the demands of coping with this illness, which is  
10 characterized by repeated hallucinations and delusions if symptoms do not stabilize.<sup>4</sup>  
11 Furthermore, a parent of a son or daughter with schizophrenia might worry about what  
12 will become of their child after his or her death. They might also feel they are not  
13 getting adequate information about what social services are available to them.<sup>5</sup> Stigma  
14 against the illness is also deeply rooted and can lead to families becoming socially  
15 isolated.<sup>3</sup> Therefore, families of people with schizophrenia have various physical,  
16 psychological, economic, and social burdens.

17 Several studies have addressed the development and evaluation of effective  
18 family interventions. According to a systematic review, family psychoeducation (FPE)  
19 is a scientifically effective psychological intervention that has been used to reduce  
20 caregiver burden.<sup>6,7</sup> The components of FPE mainly include sharing information about  
21 the disorder, early warning signs, relapse prevention, as well as skills training in coping,  
22 communication, and problem solving.<sup>8</sup> FPE can directly improve caregivers' knowledge  
23 about schizophrenia and related caregiving problems.<sup>9</sup> Improved knowledge of coping  
24 strategies and resources can lead to a more positive appraisal of caregiving experiences  
25 by families as well as caregivers' own self-efficacy in coping with the demands of  
26 caring for people with schizophrenia, thereby lessening the burden.<sup>6</sup>

27 Despite the accumulation of evidence, there are several barriers to FPE  
28 implementation. The initial report on the Schizophrenia Patient Outcomes Research  
29 Team (PORT) Treatment Recommendations found that FPE was provided to 31.6% of  
30 inpatients and 9.6% of outpatients who could have benefited from it.<sup>10</sup> A nationwide  
31 survey in Japan revealed that the implementation rate for FPE programs at psychiatric  
32 facilities is similarly low: 35.9% in hospitals and 14.5% in outpatient settings.<sup>11</sup> One  
33 challenge in implementing these programs is the length of the intervention. Most studies  
34 have found that such interventions range from 9 months to 2 years, which is impractical  
35 for medical staff and families in a clinical setting.<sup>12</sup> Other reasons include funding and  
36 staff shortages, as well as providing necessary training.<sup>13</sup> In Japan, even if healthcare

1 professionals perform FPE for a family, they cannot obtain reimbursement for medical  
2 expenses. In addition, while the Meriden Family Program appears to be effective,  
3 training is time-consuming and expensive.<sup>14</sup> The medical treatment fee system in most  
4 countries including Japan does not cover such a comprehensive family intervention. The  
5 development of a brief and implementable FPE program within the existing mental  
6 health system that is covered by national health insurance is greatly needed.<sup>15</sup>

7 Brief FPE programs have been examined in previous studies. In terms of the  
8 program framework, studies have found that brief FPE programs, delivered in five  
9 sessions or fewer or lasting no more than 3 months, were easy to conduct for both  
10 practitioners and caregivers.<sup>16</sup> Brief FPE programs have been shown to significantly  
11 increase caregivers' knowledge of the disorder, leading to reductions in relapse and  
12 rehospitalisation rates in diverse settings.<sup>17,18</sup> In addition, recent research has shown that  
13 a brief FPE program may be beneficial in reducing caregiver burden. In a pre-post test  
14 in India, a brief FPE program comprised of three 1-hour sessions aimed at educating the  
15 primary caregiver and patient about schizophrenia and imparting communication and  
16 problem-solving skills. A significant decrease in caregiver burden, measured using the  
17 Burden Assessment Scale (BAS), was found between baseline and the final follow-up at  
18 3 months.<sup>19</sup> In a randomised controlled trial in Iran, brief FPE consisted of ten 90-  
19 minute sessions held over 5 weeks (two sessions each week) conducted by a psychiatric  
20 nurse or psychiatrist. Caregiver burden measured using the Family Burden Scale (FBS)  
21 was significantly reduced both immediately after the intervention and 1 month later.<sup>20</sup>  
22 However, the effects of brief FPE programs are still inconclusive due to relatively low  
23 methodological quality in prior studies.<sup>7,16</sup> In other words, evidence from a trial with a  
24 better design is needed.

25 Practical implementation strategies for a brief FPE program need to be  
26 considered in addition to a scientific evaluation of the effects. Brief FPE programs  
27 provided by visiting nurses appear to be a potentially feasible and sustainable way of  
28 implementing FPE in a Japanese clinical setting. Visiting nurses routinely visit clients  
29 with schizophrenia and their family members. They have already built rapport with  
30 clients and family members and would be able to respond according to their needs,  
31 which means they could seamlessly provide highly individualized brief FPE.<sup>21</sup> In  
32 addition, the system of visiting nurses could easily be applied because the number of  
33 visiting nurses has been increasing recently in Japan. From a cost perspective, it would  
34 be possible to make family support a reimbursable service under national health  
35 insurance to cover psychiatric visiting nurse consultancy fees.<sup>22</sup> Taken together, brief

1 FPE provided by visiting nurses could overcome the poor implementation rate and  
2 become effective family interventions in the community setting in Japan.

### 3 4 **Hypothesis and aims**

5 We hypothesise that brief FPE provided by visiting nurses could alleviate the burden on  
6 families and caregivers of people with schizophrenia. The aim of this study is to clarify  
7 whether visiting nurses providing brief FPE to families caring for people with  
8 schizophrenia alleviates family burden through a cluster randomised controlled trial  
9 (cRCT).

## 10 11 **METHODS AND ANALYSIS**

### 12 **Trial design**

13 This study is a two-arm, parallel-group cRCT. The randomisation procedure will be  
14 conducted at the cluster level (visiting nurse agencies). Visiting nurse agencies will be  
15 randomly assigned to the intervention or control (treatment as usual (TAU)) group in a  
16 1:1 ratio. Data will be collected at the individual level. Analyses to evaluate the efficacy  
17 of the intervention program will be conducted at the individual level, taking into  
18 consideration cluster-level effects. The study protocol was registered in the University  
19 Hospital Medical Information Network (UMIN) Clinical Trials Registry (UMIN-CTR  
20 ID, UMIN000038044). This protocol has been reported according to the Standard  
21 Protocol Items: Recommendations for Interventional Trials (SPIRIT) guidelines.<sup>23</sup> The  
22 anticipated trial start date will be 18 September 2019 and the date of last follow-up will  
23 be 31 May 2020.

### 24 25 **Setting and site selection at the cluster level**

26 Figure 1 shows the participant flow chart for this study. The corresponding author (NY)  
27 explained the purpose of this study to 68 visiting nurse agencies in four prefectures in  
28 Japan (Tokyo, Saitama, Kanagawa, and Chiba) through the organisation. Forty-seven  
29 visiting nurse agencies agreed to participate in the study. All the participating visiting  
30 nurse agencies are managed by one organisation.

31 To be included, a visiting nurse agency must provide services mostly to  
32 psychiatric patients or clients, not elderly people or those with physical diseases. In each  
33 agency, visiting nurses must care for at least two people with schizophrenia who live  
34 with their family. There are no exclusion criteria at the cluster level.

### 35 36 **Randomisation at the cluster level**



1  
2  
3  
4  
5  
6 1 Visiting nurse agencies that meet the inclusion criteria will be randomly allocated to the  
7 2 intervention group (brief FPE program) or the control group. Randomisation will be  
8 3 stratified by the median of the average caseload of visiting nurses in each agency. We  
9 4 used stratified randomisation based on this factor because the number of patients for  
10 5 whom a visiting nurse can maintain service quality is generally fixed.<sup>24</sup> If a visiting  
11 6 nurse has too many patients, family support will probably be neglected. A random  
12 7 sequence table will be created by a researcher (HT) in another department at our  
13 8 institution who is not involved in the study protocol development process. In addition,  
14 9 another independent researcher (SY) who is not involved in intervention and analysis  
15 10 will conduct the randomisation and will inform each visiting nurse agency of the  
16 11 randomisation results. The primary investigator (NY) will be blinded through the entire  
17 12 randomisation process.  
18 13

#### 14 **Participant eligibility criteria and recruitment procedure at the individual level**

15 15 At the individual level, we set the following inclusion criteria for a caregiver of a person  
16 16 with schizophrenia: 1) is the primary caregiver; 2) aged over 20 years; 3) is a family  
17 17 member of the person with schizophrenia such as a parent, sibling, spouse, or child; and  
18 18 4) lives with the person with schizophrenia. There are no exclusion criteria for  
19 19 caregivers. In addition, the inclusion criteria for people with schizophrenia are as  
20 20 follows: 1) diagnosis of schizophrenia based on the International Statistical  
21 21 Classification of Diseases and Related Health Problems, 10th revision and 2) receiving  
22 22 services from visiting nurses.

23 23 As part of the recruitment procedure at the individual level, all potential  
24 24 participants (caregivers of people with schizophrenia and people with schizophrenia) at  
25 25 each agency will be listed. Second, a randomly ordered list will be created using a  
26 26 random number generator in the Stata statistical software program, version 15, in order  
27 27 to avoid selection bias at the individual level. Third, each visiting nurse, after attending  
28 28 a lecture on study design and ethical considerations, will recruit participants in  
29 29 accordance with the randomly ordered list until five participants have been recruited.  
30 30 The study will include only participants who voluntarily agree to participate in the  
31 31 study.  
32 32

#### 33 **Intervention program**

34 34 The intervention program consists of a single-family intervention conducted by  
35 35 psychiatric visiting nurses. It is based on the Family Intervention and Support in  
36 36 Schizophrenia: A Manual on Family Intervention for the Mental Health Professional.<sup>25</sup>



1  
2  
3  
4  
5  
6  
7  
8  
9  
10  
11  
12  
13  
14  
15  
16  
17  
18  
19  
20  
21  
22  
23  
24  
25  
26  
27  
28  
29  
30  
31  
32  
33  
34  
35  
36  
37  
38  
39  
40  
41  
42  
43  
44  
45  
46  
47  
48  
49  
50  
51  
52  
53  
54  
55  
56  
57  
58  
59  
60

1 This program was developed through discussions and collaborations among members of  
2 the Family Association of Schizophrenia, psychiatric visiting nurses, FPE experts,  
3 psychiatrists, psychiatric nurses, clinical psychologists, and mental health social  
4 workers based on the concept of coproduction and Patient and Public Involvement  
5 (PPI).<sup>26</sup> During the development process, we tried to avoid long sentences, enlarged the  
6 characters, and used visually appealing drawings. The program consists of four sessions  
7 that last 60 minutes each using the above tool. It will be completed over a period of a  
8 month. Attendance of at least one session is required. Using this intervention tool,  
9 psychiatric visiting nurses will provide appropriate information and advice to the family  
10 about living problems based on their own nursing clinical experience. We will also  
11 create a checklist to confirm how many sessions visiting nurses are actually able to  
12 conduct with participants.

13 Before the intervention, we will provide the intervention team of psychiatric  
14 visiting nurses with a 1-day lecture. The lecture will consist of three parts. First,  
15 caregivers will talk about their life problems and what they want visiting nurses to do;  
16 this is expected to increase the motivation of visiting nurses. Second, basic  
17 communication training will be conducted through role-playing. Visiting nurses, who  
18 will be brief FPE providers, will be in groups of three. They will each play the role of a  
19 visiting nurse, caregiver, and evaluator. They will practice listening to caregivers. Third,  
20 the primary investigator (NY) will equip them with basic knowledge about FPE and  
21 explain the contents of this intervention tool and the points that the primary investigator  
22 wants to emphasise. Through these trainings, we expect to improve the motivation,  
23 knowledge, and skills of the visiting nurses in providing the brief FPE program.

24 Table 1 shows the contents of the intervention tool. Session I will cover general  
25 knowledge about schizophrenia: definition, causes, symptoms, prognosis,  
26 pharmacological treatment, and psychosocial rehabilitation. Regarding definition and  
27 causes, visiting nurses will stress that schizophrenia is a brain disease that can manifest  
28 in anyone using the diathesis-stress model and the dopamine hypothesis. It is important  
29 to provide the family with a biological explanation about the aetiology of schizophrenia  
30 because there might be family members who think people become schizophrenic  
31 because of family relationships.<sup>27</sup> In addition to an explanation of the symptoms  
32 themselves, visiting nurses will describe how people with schizophrenia have  
33 difficulties living their own lives due to their symptoms. Visiting nurses will explain the  
34 disease course such as the prodromal phase, acute phase, and recovery phase. Next,  
35 visiting nurses will explain the characteristics of each phase and what to do during each  
36 phase. In terms of prognosis, visiting nurses will emphasise that schizophrenia is not

1 necessarily a disease with a bad prognosis. In people with their first episode of  
2 schizophrenia, about 70% will have a good intermediate to long-term outcome if they  
3 receive appropriate pharmacological therapy.<sup>28</sup> Concerning medication, visiting nurses  
4 will appreciate the idea that people with schizophrenia usually do not want to take  
5 medication. Visiting nurses will talk about the necessity, safety, and reasons for  
6 adherence to pharmacological therapy. In addition, the side effects of antipsychotic  
7 medications will be described clearly, using relevant pictures. Finally, visiting nurses  
8 will give an outline of psychosocial therapy. At the end, participants will answer  
9 questions with dichotomous answers—“yes” or “no”—to confirm what they have  
10 learned from the session.

11         Session II will deal with how to cope with people with schizophrenia and  
12 provide problem-solving skills. The contents of this session include how to cope with  
13 hallucinations and delusions; signs of recurrence; how to prevent recurrences; how to  
14 cope when the disease gets worse; what to do with people with schizophrenia when they  
15 stay at home all day; how to respond to people with schizophrenia who do not want to  
16 take their medication; how to respond when domestic violence is imminent, is  
17 occurring, or has occurred; and how to get involved when self-injury or suicide is  
18 suspected. Finally, visiting nurses will explain problem-solving skills. In a routine  
19 clinical setting, the family will work on matters that are causing trouble in daily life  
20 using problem-solving skills.

21         Session III will cover communication and emotions: understanding the feelings  
22 of people with schizophrenia, expressed emotion (EE) theory, basic knowledge and  
23 skills about communication, and a lecture on desirable and undesirable communication  
24 with people with schizophrenia. In the first section, visiting nurses will describe the  
25 importance of understanding that people with schizophrenia are likely to have a  
26 pessimistic view about their future. In the second section on EE theory, visiting nurses  
27 will appreciate that it is natural for a family to have high EE, poor knowledge, and lack  
28 of support for mental illness.<sup>29</sup> Of note, visiting nurses will not force family members to  
29 play the role of supporter. When family members hear the explanation of high EE, many  
30 might feel that they are responsible for their burden. Visiting nurses will emphasise that  
31 both families and people with schizophrenia should think about positive and  
32 constructive communication to ensure mutual independence. In the third section on  
33 basic knowledge about communication and the lecture of desirable and undesirable  
34 communication with patients, caregivers will practice conversations using real cases and  
35 will be given time to consider better communication strategies.

1  
2  
3  
4  
5  
6 1 Session IV will focus on the family's recovery. Topics will include thinking about  
7 2 the family's recovery, the importance of living one's own life, taking care of the  
8 3 family's physical and mental health needs, proper stress management, experiences and  
9 4 messages from members of the Family Association, and identifying available social  
10 5 resources in the community. During this session, visiting nurses will stress that people  
11 6 with schizophrenia and family members each have their own lifestyle and individual  
12 7 goals. Visiting nurses will also encourage family members to live their own lives using  
13 8 a variety of social resources instead of only working hard to take care of a person with  
14 9 schizophrenia. In addition, visiting nurses expect that family members will improve  
15 10 their physical and mental health by acquiring knowledge on self-care and stress  
16 11 management skills. Furthermore, visiting nurses will introduce the experiences of three  
17 12 members of the Family Association who have taken care of a person with  
18 13 schizophrenia. It is expected that others' similar experiences will help family members  
19 14 understand that they are not the only people experiencing such a hard time and relieve  
20 15 their feelings of sadness or hopelessness. Finally, visiting nurses will explain the social  
21 16 resources available in the community for family members and confirm the importance  
22 17 of connecting with many supporters around them.  
23  
24  
25  
26  
27  
28  
29  
30  
31  
32

### 33 **Control group**

34 20 Caregivers enrolled in the control group will receive usual care from visiting nurses.  
35 21 They will be put on a waiting list to receive the same intervention program after  
36 22 completing the 6-month follow-up assessment. They will not receive any type of  
37 23 psychoeducation or supportive therapies.  
38  
39  
40  
41

### 42 **Outcomes**

43 26 Table 2 shows an overview of the outcome measures. Outcome measures will be  
44 27 assessed at baseline prior to the intervention (T1), immediately after the completion of  
45 28 the intervention (1-month follow-up, T2), and 6 months after the baseline assessment  
46 29 (6-month follow-up, T3).  
47  
48  
49  
50

### 51 **Primary outcome for caregivers**

52 32 Zarit Burden Interview (ZBI-22)

53 33 ZBI-22 will be used to measure caregiver burden. It consists of 22 items scored on a  
54 34 five-point Likert scale from 0 (never) to 4 (nearly always), except for the final item on  
55 35 global burden, which is rated from 0 (not at all) to 4 (extremely). The total score ranges  
56 36 from 0 to 88, with higher scores indicating higher burden. The Japanese version of ZBI-

22 has high test-retest reproducibility and internal consistency. Construct validity has also been confirmed.<sup>30</sup>

#### **Secondary outcome for caregivers**

##### **K6**

K6 will be used to measure sub-clinical depression and anxiety disorders as part of a self-administered questionnaire. It consists of six items answered on a five-point Likert scale. Scores range from 0 to 24, with higher scores representing higher degrees of sub-clinical depression and anxiety disorder. The Japanese versions have essentially equivalent screening performance as the original English versions.<sup>31</sup>

##### **General Self Efficacy Scale (GSES)**

GSES is a measurement of self-efficacy in daily living. It includes 16 items with dichotomous questions. The higher the score, the better the self-efficacy, in general. GSES has high test-retest reproducibility and internal consistency. Construct validity has been confirmed.<sup>32</sup>

##### **WHO-5**

WHO-5 will be used to measure subjective quality of life based on positive mood (good spirits and relaxation), vitality (being active and waking up fresh and rested), and general interest (being interested in things). It consists of five items rated on a six-point Likert scale. Higher scores mean higher well-being. The Japanese version of WHO-5 has adequate internal consistency. It has been confirmed to have external concurrent validity and external discriminatory validity.<sup>33</sup>

##### **Knowledge of Illness and Drug Inventory (KIDI)**

KIDI will be used to assess knowledge regarding mental illness and the effects of medications on mental illness. There are two sub-scales: 10 items assessing knowledge of mental illness and 10 items assessing knowledge of the effects of antipsychotic drugs. This inventory consists of a self-reported inventory where respondents are asked to select the correct answer from three choices, with higher scores representing greater knowledge. KIDI is frequently used to assess knowledge about mental disorders and treatments in Japan.<sup>34</sup>

#### **Secondary outcomes in people with schizophrenia**

##### **Behavior and Symptom Identification Scale (BASIS-32)**

1  
2  
3  
4  
5  
6  
7  
8  
9  
10  
11  
12  
13  
14  
15  
16  
17  
18  
19  
20  
21  
22  
23  
24  
25  
26  
27  
28  
29  
30  
31  
32  
33  
34  
35  
36  
37  
38  
39  
40  
41  
42  
43  
44  
45  
46  
47  
48  
49  
50  
51  
52  
53  
54  
55  
56  
57  
58  
59  
60

1 BASIS-32 is a commonly used measure in mental health. It includes 32 items on a five-  
2 point Likert scale, where 0 indicates no difficulties and 4 indicates severe difficulties.  
3 The scale measures five factors: (1) relation to self and others (seven items); (2)  
4 depression/anxiety (six items); (3) everyday life and role functioning (nine items); (4)  
5 impulsive and addictive behaviour (six items); and (5) psychosis (four items). Factors 1,  
6 2, 4, and 5 are assessed as the total score divided by the number of items answered  
7 (mean score). Factor 3 is assessed based on the highest rating. Internal consistency and  
8 construct validity of the Japanese version of BASIS-32 have been demonstrated.<sup>35</sup>

### 10 WHO-5

11 WHO-5 is used to measure subjective quality of life based on positive mood (good  
12 spirits and relaxation), vitality (being active and waking up fresh and rested), and  
13 general interest (being interested in things). WHO-5 comprises five items rated on a six-  
14 point Likert scale. Higher scores mean higher well-being. The Japanese version of  
15 WHO-5 has adequate internal consistency. It has been confirmed to have external  
16 concurrent validity and external discriminatory validity.<sup>33</sup>

### 18 Hospitalisation by 6-month follow-up

19 This is a question with a dichotomous answer (yes or no) about whether the patient has  
20 been hospitalised during the past 6 months. The answer will be provided by the  
21 caregiver at baseline and the 6-month follow-up.

### 23 **Sample size calculation**

24 The sample size required was calculated according to guidelines in the Consolidated  
25 Standards of Reporting Trials (CONSORT) for cRCTs,<sup>36</sup> taking into account intra-class  
26 correlations (ICCs). The effect size of a brief FPE program for individual caregiver  
27 burden was estimated based on a previous pre-post test.<sup>19</sup> The pre-post test concluded  
28 that the standardised mean difference (d) of brief FPE on family burden was 0.46.  
29 Sample size was estimated as 76 in each arm based on an alpha error probability of 0.05  
30 and power (1- $\beta$ ) of 0.80, using G\*Power version 3.1.9.2.<sup>37 38</sup> For cRCTs, this value  
31 should be multiplied by design effect (1+[m-1] $\rho$ ), where m is the average cluster size  
32 and  $\rho$  is the ICC.<sup>39</sup> The estimated ICC for the primary outcome in this study was set to  
33 0.05 and the average number of caregivers per cluster was set at 5. Assuming an  
34 attrition rate of 20%, the required sample size is 110 caregivers in each arm. Thus, at  
35 least 44 visiting nurse agencies will be recruited.

## 1 **Quantitative analysis**

2 The statistician will be blinded to the treatment group. We will analyse clinical  
3 outcomes on the basis of intention to treat and model the effect of the intervention on  
4 primary and secondary continuous outcomes using generalised linear latent and mixed  
5 models (GLLAMMs). This will allow for missing data to be taken into account within  
6 the statistical model. In this study, a three-level model will be used, with repeated  
7 measures nested in participants and participants nested in clusters. Time (baseline, 1-  
8 month follow-up, 6-month follow-up) will be considered level 1, individual caregivers  
9 will be considered level 2, and clusters (visiting nurse agencies) will be considered level  
10 3. Regarding fixed effects, condition (intervention versus control), time, and a two-way  
11 interaction effect, condition by time, will be included. Models will adjust for baseline  
12 differences in caregiver socio-demographics such as age, gender, education, household  
13 income, family relationship with the person with schizophrenia, length of caregiving,  
14 and length of visiting nurse system use. Multiple levels of Cox proportional hazards  
15 regression models will also be used for the dichotomous question of hospitalisation at  
16 the 6-month follow-up. A *p*-value of less than 0.05 will be considered statistically  
17 significant.

## 18 **Data monitoring**

19 A data monitoring committee (DMC) will be set up. It will consist of at least two  
20 independent members. The DMC will meet monthly after the first participant has been  
21 randomised. The purpose of the meeting will be to review participation rates and  
22 reasons for study dropout. The DMC will be independent from any sponsor and  
23 competing interest.

## 24 **Patient and public involvement**

25 The research question, study design, and outcome measures were determined based on a  
26 discussion with representatives of the Family Association of Schizophrenia. The  
27 intervention program was developed through discussion and collaboration among  
28 members of the Family Association of Schizophrenia, psychiatric visiting nurses, FPE  
29 experts, psychiatrists, psychiatric nurses, clinical psychologists, and mental health social  
30 workers. After the completion of the study, this intervention tool will be available for  
31 anyone who wants to use it via the internet.

## 32 **Ethics and dissemination**

33 Ethical considerations



1  
2  
3  
4  
5  
6  
7  
8  
9  
10  
11  
12  
13  
14  
15  
16  
17  
18  
19  
20  
21  
22  
23  
24  
25  
26  
27  
28  
29  
30  
31  
32  
33  
34  
35  
36  
37  
38  
39  
40  
41  
42  
43  
44  
45  
46  
47  
48  
49  
50  
51  
52  
53  
54  
55  
56  
57  
58  
59  
60

1 The authors assert that all procedures contributing to this work comply with the ethical  
2 standards of the relevant national and institutional committees on human  
3 experimentation and with the Helsinki Declaration of 1975, as revised in 2008. The  
4 study protocol was approved by the Research Ethics Committee of the Graduate School  
5 of Medicine and the Faculty of Medicine at the University of Tokyo, Japan (No.  
6 2019065NI). We will obtain informed consent from all caregivers and patients. The  
7 consent form will inform caregivers and patients that we guarantee protection of  
8 personal information and that the data will be anonymous and used only for academic  
9 purposes. There are no competing interests. This study is supported by the fundamental  
10 study on effective community services for people with severe mental disorders and their  
11 families.

### 13 Dissemination of the research findings

14 The findings will be published in a scientific peer-reviewed journal according to the  
15 CONSORT guidelines for cRCTs.<sup>36</sup> The participants will be informed of conference  
16 presentations and publications.

### 18 **Strengths and limitations**

19 The study has both strengths and limitations. First, the study will evaluate an  
20 implementable brief FPE program that potentially reduces time, cost, and staffing  
21 problems by incorporating the program into an existing mental health service system,  
22 namely visiting nurse services. Second, this is the first cRCT of a brief FPE program,  
23 which could prevent contamination between the intervention and control groups. Third,  
24 based on the concept of coproduction and PPI,<sup>26</sup> the study incorporated a variety of  
25 viewpoints from caregivers, visiting nurses, and FPE experts.

26 We recognise three limitations of this study. First, since the sampling method for  
27 participating agencies was not random, there is a possibility of selection bias. Second,  
28 since subjects will provide data through a self-reported questionnaire, information bias  
29 or random error is possible. For example, the severity of symptoms in people with  
30 schizophrenia that impact a caregiver's burden may not be accurately measured. Third,  
31 we designed the study and intervention based on coproduction, but there are still  
32 concerns about its feasibility in actual clinical settings. For example, participants might  
33 not complete all four sessions due to the condition of people with schizophrenia, family  
34 work, and family hospitalisation. Fourth, due to the short study period, the number of  
35 participants may not be able to meet the target sample size. These may lead to a high  
36 attrition rate during implementation.

1  
2  
3  
4  
5  
6  
7  
8  
9  
10  
11  
12  
13  
14  
15  
16  
17  
18  
19  
20  
21  
22  
23  
24  
25  
26  
27  
28  
29  
30  
31  
32  
33  
34  
35  
36  
37  
38  
39  
40  
41  
42  
43  
44  
45  
46  
47  
48  
49  
50  
51  
52  
53  
54  
55  
56  
57  
58  
59  
60

## Acknowledgments

The authors would like to thank the members of the *Mokusei* Family Association of Schizophrenia and N · FIELD Co., Ltd. for their invaluable advice on many aspects of the project.

## Contributors

NY is the principal investigator responsible for the initial draft of this manuscript and organising and implementing the study. NY and KW calculated the sample size. NY, KW, SY, and MA decided on the analytic strategy. SS, TS, HT, KI, DN, CF, and NK helped throughout the development of the interventions and gave valuable feedback on the study protocol. All authors have read and approved the final manuscript.

**Funding:** This work is supported by the Fundamental study on effective community services for people with severe mental disorders and their families.

**Competing interests:** None declared.

**Patient Consent:** Obtained.

**Ethics approval:** Research Committee of the Graduate School of Medicine and the Faculty of Medicine at the University of Tokyo, Japan.

## REFERENCES

1. Awad AG, Voruganti LN. The burden of schizophrenia on caregivers: a review. *Pharmacoecon Open* 2008;26:149–62. doi:10.2165/00019053-200826020-00005
2. Saunders JC. Families living with severe mental illness: a literature review. *Issues Ment Health Nurs* 2003;24:175–98. doi:10.1080/01612840305301
3. Shah AJ, Wadoo O, Latoo J. Psychological distress in carers of people with mental disorders. *British Journal of Medical Practitioners* 2010;3:a327.
4. Gopinath PA, Chaturvedi S. Distress behaviour of schizophrenics at home. *Acta Psychiatr Scand* 1992;86:185–8. doi:10.1111/j.1600-0447.1992.tb03249.x



1  
2  
3  
4  
5  
6  
7  
8  
9  
10  
11  
12  
13  
14  
15  
16  
17  
18  
19  
20  
21  
22  
23  
24  
25  
26  
27  
28  
29  
30  
31  
32  
33  
34  
35  
36  
37  
38  
39  
40  
41  
42  
43  
44  
45  
46  
47  
48  
49  
50  
51  
52  
53  
54  
55  
56  
57  
58  
59  
60

- 1  
2  
3  
4  
5  
6 1
- 7 2 5. McAuliffe R, O'Connor L, Meagher D. Parents' experience of living with and caring  
8 3 for an adult son or daughter with schizophrenia at home in Ireland: a qualitative  
9 4 study. *J Psychiatr Ment Health Nurs* 2014;21:145–53. doi:10.1111/jpm.12065
- 10 5
- 11 6 6. Sin J, Gillard S, Spain D, *et al.* Effectiveness of psychoeducational interventions for  
12 7 family carers of people with psychosis: a systematic review and meta-analysis. *Clin*  
13 8 *Psychol Rev* 2017;56:13–24. doi:10.1016/j.cpr.2017.05.002
- 14 9
- 15 10 7. Sin J, Jordan CD, Barley EA, *et al.* Psychoeducation for siblings of people with  
16 11 severe mental illness. *Cochrane Database Syst Rev* 2015;5:Cd010540.  
17 12 doi:10.1002/14651858.CD010540.pub2
- 18 13
- 19 14 8. Dixon L, McFarlane WR, Lefley H, *et al.* Evidence-based practices for services to  
20 15 families of people with psychiatric disabilities. *Psychiatr Serv* 2001;52:903–10.  
21 16 doi:10.1176/appi.ps.52.7.903
- 22 17
- 23 18 9. Birchwood M, Smith J, Cochrane R. Specific and non-specific effects of educational  
24 19 intervention for families living with schizophrenia. A comparison of three methods.  
25 20 *Br J Psychiatry* 1992;160:806–14. doi:10.1192/bjp.160.6.806
- 26 21
- 27 22 10. Lehman AF, Steinwachs DM. Patterns of usual care for schizophrenia: initial results  
28 23 from the Schizophrenia Patient Outcomes Research Team (PORT) Client Survey.  
29 24 *Schizophr Bull* 1998;24:11–20; discussion 20–32.  
30 25 doi:10.1093/oxfordjournals.schbul.a033303
- 31 26
- 32 27 11. Oshima I, Mino Y, Nakamura Y, *et al.* Implementation and dissemination of family  
33 28 psychoeducation in Japan: nationwide survey on psychiatric hospitals in 1995 and  
34 29 2001. *Journal of Social Policy & Social Work* 2007;11:5–16.
- 35 30
- 36 31 12. Rummel-Kluge C, Kissling W. Psychoeducation in schizophrenia: new  
37 32 developments and approaches in the field. *Curr Opin Psychiatry* 2008;21:168–72.  
38 33 doi:10.1097/YCO.0b013e3282f4e574
- 39 34
- 40 35 13. Harvey C. Family psychoeducation for people living with schizophrenia and their  
41 36 families. *BJPsych Adv* 2018;24:9–19. doi:10.1192/bja.2017.4

- 1  
2  
3  
4  
5  
6 1  
7 2 14. Fadden G, Heelis R. 2011. The Meriden Family Programme: lessons learned over  
8 3 10 years. *J Ment Health* 2011;20:79–88. doi:10.3109/09638237.2010.492413  
9 4 [published online first: 2 September 2010].  
10 5  
11 6 15. McFarlane WR, Dixon L, Lukens E, *et al.* Family psychoeducation and  
12 7 schizophrenia: a review of the literature. *J Marital Fam Ther* 2003;29:223–45.  
13 8  
14 9 16. Okpokoro U, Adams CE, Sampson S. Family intervention (brief) for schizophrenia.  
15 10 *Cochrane Database Syst Rev* 2014;3:Cd009802.  
16 11 doi:10.1002/14651858.CD009802.pub2  
17 12  
18 13 17. Pitschel-Walz G, Leucht S, Bauml J, *et al.* The effect of family interventions on  
19 14 relapse and rehospitalization in schizophrenia—a meta-analysis. *Schizophr Bull*  
20 15 2001;27:73–92. doi:10.1093/oxfordjournals.schbul.a006861.  
21 16  
22 17 18. Smith JV, Birchwood MJ. Specific and non-specific effects of educational  
23 18 intervention with families living with a schizophrenic relative. *Br J Psychiatry*  
24 19 1987;150:645–52. doi:10.1192/bjp.150.5.645.  
25 20  
26 21 19. Devaramane V, Pai NB, Vella SL. The effect of a brief family intervention on  
27 22 primary carer's functioning and their schizophrenic relatives levels of  
28 23 psychopathology in India. *Asian J Psychiatr* 2011;4:183–7.  
29 24 doi:10.1016/j.ajp.2011.06.004  
30 25  
31 26 20. Sharif F, Shaygan M, Mani A. Effect of a psycho-educational intervention for  
32 27 family members on caregiver burdens and psychiatric symptoms in patients with  
33 28 schizophrenia in Shiraz, Iran. *BMC Psychiatry* 2012;12:48. doi:10.1186/1471-244x-  
34 29 12-48  
35 30  
36 31 21. Huang XY, Ma WF, Shih HH, *et al.* Roles and functions of community mental  
37 32 health nurses caring for people with schizophrenia in Taiwan. *J Clin Nurs*  
38 33 2008;17:3030–40. doi:10.1111/j.1365-2702.2008.02426.x  
39 34  
40  
41  
42  
43  
44  
45  
46  
47  
48  
49  
50  
51  
52  
53  
54  
55  
56  
57  
58  
59  
60

- 1  
2  
3  
4  
5  
6 1 22. Setoya N, Kayama M, Tsunoda A, *et al.* A survey of the family care provided in  
7 2 psychiatric home-visit nursing and related characteristics of clients. *Japanese*  
8 3 *Bulletin of Social Psychiatry* 2011;20:17–25.  
9 4  
10 5  
11 6 23. Chan AW, Tetzlaff JM, Altman DG, *et al.* SPIRIT 2013 statement: defining  
12 7 standard protocol items for clinical trials. *Ann Intern Med* 2013;158:200–7.  
13 8 doi:10.7326/0003-4819-158-3-201302050-00583  
14 9  
15 10 24. Mueser, K. T., Bond, G. R., Drake, R. E., & Resnick, S. G. (1998). Models of  
16 11 community care for severe mental illness: a review of research on case management.  
17 12 *Schizophr Bull*, 24(1), 37-74. doi:10.1093/oxfordjournals.schbul.a033314  
18 13  
19 14 25. Varghese M, Shah A, Kumar GSU, *et al.* Family intervention and support in  
20 15 schizophrenia: a manual on family intervention for the mental health professional,  
21 16 version 2. Bangalore, India: National Institute of Mental Health and Neurosciences.  
22 17  
23 18 26. Batalden M, Batalden P, Margolis P, *et al.* Coproduction of healthcare service. *BMJ*  
24 19 *Qual Safe* 2016;25:509–17. doi:10.1136/bmjqs-2015-004315  
25 20  
26 21 27. Ferriter M, Huband N. Experiences of parents with a son or daughter suffering from  
27 22 schizophrenia. *J Psychiatr Ment Health Nurs* 2003;10:552–60. doi:10.1046/j.1365-  
28 23 2850.2003.00624.x  
29 24  
30 25 28. Menezes NM, Arenovich T, Zipursky RB. A systematic review of longitudinal  
31 26 outcome studies of first-episode psychosis. *Psychol Med* 2006;36:1349–62.  
32 27 doi:10.1017/s0033291706007951  
33 28  
34 29 29. Amaresha AC, Venkatasubramanian G. Expressed emotion in schizophrenia: an  
35 30 overview. *Indian J Psychol Med* 2012;34:12–20. doi:10.4103/0253-7176.96149  
36 31  
37 32 30. Arai Y, Kudo K, Hosokawa T, *et al.* Reliability and validity of the Japanese version  
38 33 of the Zarit Caregiver Burden interview. *Psychiatry Clin Neurosci* 1997;51:281–7.  
39 34 doi:10.1111/j.1440-1819.1997.tb03199.x

- 1  
2  
3  
4  
5  
6 1 31. Sakurai K, Nishi A, Kondo K, *et al.* Screening performance of K6/K10 and other  
7 2 screening instruments for mood and anxiety disorders in Japan. *Psychiatry Clin*  
8 3 *Neurosci* 2011;65:434–41. doi:10.1111/j.1440-1819.2011.02236.x  
9 4  
10 5  
11 6 32. Sakano Y, Tohjoh M. The General Self-Efficacy Scale (GSES): scale development  
12 7 and validation. *Japanese Journal of Behavior Therapy* 1986;12:73–82.  
13 8  
14 9 33. Awata S, Bech P, Yoshida S, *et al.* Reliability and validity of the Japanese version  
15 10 of the World Health Organization-Five Well-Being Index in the context of detecting  
16 11 depression in diabetic patients. *Psychiatry Clin Neurosci* 2007;61:112–9.  
17 12 doi:10.1111/j.1440-1819.2007.01619.x  
18 13  
19 14 34. Maeda M, OM, Renri T, *et al.* It is as a result of disease drug knowledge degree  
20 15 investigation (Knowledge of Illness and Drugs Inventory, KIDI) for a person with  
21 16 IIB-29 schizophrenia and the family. *Japanese Bulletin of Social Psychiatry*  
22 17 1994;2:173–4.  
23 18  
24 19 35. Setoya Y, N. Y., Kurita H. Utility of the Japanese version of the BASIS-32 in  
25 20 inpatients in psychiatric hospital. *Japanese Journal of Clinical Psychiatry*  
26 21 2002;31:571–5.  
27 22  
28 23 36. Campbell MK, Piaggio G, Elbourne DR, *et al.* Consort 2010 statement: extension to  
29 24 cluster randomised trials. *BMJ* 2012;345:e5661. doi:10.1136/bmj.e5661  
30 25  
31 26 37. Faul F, Erdfelder E, Buchner A, *et al.* Statistical power analyses using G\*Power 3.1:  
32 27 tests for correlation and regression analyses. *Behav Res Methods* 2009;41:1149–60.  
33 28 doi:10.3758/brm.41.4.1149  
34 29  
35 30 38. Faul F, Erdfelder E, Lang AG, *et al.* G\*Power 3: a flexible statistical power analysis  
36 31 program for the social, behavioral, and biomedical sciences. *Behav Res Methods*  
37 32 2007;39:175–91.  
38 33  
39 34 39. Campbell MK, Elbourne DR, Altman DG. CONSORT statement: extension to  
40 35 cluster randomised trials. *BMJ* 2004;328:702–8. doi:10.1136/bmj.328.7441.702  
41 36  
42  
43  
44  
45  
46  
47  
48  
49  
50  
51  
52  
53  
54  
55  
56  
57  
58  
59  
60

**Table 1. Outline of the brief family psychoeducation program**

| Session number | Session aim                                                             | Content                                                                                                                                                                                                                                                                                                                                                                                                                                                                                                              |
|----------------|-------------------------------------------------------------------------|----------------------------------------------------------------------------------------------------------------------------------------------------------------------------------------------------------------------------------------------------------------------------------------------------------------------------------------------------------------------------------------------------------------------------------------------------------------------------------------------------------------------|
| I              | General knowledge about schizophrenia                                   | Definition, causes, symptoms, prognosis, pharmacological treatment, psychosocial rehabilitation.<br>Activity: Let's review the knowledge gained in this session.                                                                                                                                                                                                                                                                                                                                                     |
| II             | How to cope with people with schizophrenia using problem-solving skills | How to cope with hallucinations and delusions; signs of recurrence and how to prevent recurrence; how to cope when the disease gets worse; what to do with people with schizophrenia when they stay at home all day; how to respond to people with schizophrenia who do not want to take their medication; what to do when domestic violence is imminent, is happening, or has happened; how to get involved when self-injury or suicide is suspected.<br>Activity: Let's learn how to apply problem-solving skills. |
| III            | Handling communication and emotions                                     | Understanding the feelings of people with schizophrenia, expressed emotion theory, basic knowledge about communication, and lecture about desirable and undesirable communication with people with schizophrenia.<br>Activity: Let's practice conversations using real cases.                                                                                                                                                                                                                                        |
| IV             | Family recovery                                                         | Thinking about the family's recovery, importance of living one's own life, taking care of the family's physical and mental health needs, proper stress management, and experiences and messages from members of the Family Association.<br>Activity: Let's identify social resources in the community and recognise the importance of connecting with many supporters around families.                                                                                                                               |

1 **This intervention program consists of four 60-minute modules completed over 1 month.**

2 **Table 2. Outcome measures**

3

4

|    | Outcome measure                                      | Baseline | 1-month follow-up | 6-month follow-up |
|----|------------------------------------------------------|----------|-------------------|-------------------|
| 5  | Caregivers                                           |          |                   |                   |
| 6  | Zarit Burden Interview (ZBI-22)                      | ✓        | ✓                 | ✓                 |
| 7  |                                                      |          |                   |                   |
| 8  | K6                                                   | ✓        | ✓                 | ✓                 |
| 9  |                                                      |          |                   |                   |
| 10 | General Self-Efficacy Scale (GSES)                   | ✓        | ✓                 | ✓                 |
| 11 |                                                      |          |                   |                   |
| 12 | WHO-5                                                | ✓        | ✓                 | ✓                 |
| 13 |                                                      |          |                   |                   |
| 14 | Knowledge of Illness and Drug Inventory (KIDI)       | ✓        | ✓                 | ✓                 |
| 15 |                                                      |          |                   |                   |
| 16 |                                                      |          |                   |                   |
| 17 |                                                      |          |                   |                   |
| 18 |                                                      |          |                   |                   |
| 19 |                                                      |          |                   |                   |
| 20 | People with schizophrenia                            |          |                   |                   |
| 21 | Behavior and Symptom Identification Scale (BASIS-32) | ✓        | ✓                 | ✓                 |
| 22 |                                                      |          |                   |                   |
| 23 | WHO-5                                                | ✓        | ✓                 | ✓                 |
| 24 |                                                      |          |                   |                   |
| 25 | Hospitalisation during the past 6 months             | ✓        | –                 | ✓                 |
| 26 |                                                      |          |                   |                   |
| 27 |                                                      |          |                   |                   |
| 28 |                                                      |          |                   |                   |

29

30

31

32

33

34

35

36

37

38

39

40

41

42

43

44

45

46

1  
2  
3  
4  
5  
6  
7  
8  
9  
10  
11  
12  
13  
14  
15  
16  
17  
18  
19  
20  
21  
22  
23  
24  
25  
26  
27  
28  
29  
30  
31  
32  
33  
34  
35  
36  
37  
38  
39  
40  
41  
42  
43  
44  
45  
46

**Figure 1**

For peer review only

Figure 1. Study flow chart





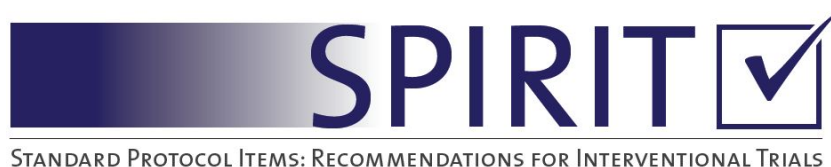

STANDARD PROTOCOL ITEMS: RECOMMENDATIONS FOR INTERVENTIONAL TRIALS

SPIRIT 2013 Checklist: Recommended items to address in a clinical trial protocol and related documents\*

| Section/item                      | ItemNo | Description                                                                                                                                                                                                                                                                              |      |
|-----------------------------------|--------|------------------------------------------------------------------------------------------------------------------------------------------------------------------------------------------------------------------------------------------------------------------------------------------|------|
| <b>Administrative information</b> |        |                                                                                                                                                                                                                                                                                          |      |
| Title                             | 1      | Descriptive title identifying the study design, population, interventions, and, if applicable, trial acronym                                                                                                                                                                             | P1   |
| Trial registration                | 2a     | Trial identifier and registry name. If not yet registered, name of intended registry                                                                                                                                                                                                     | P2   |
|                                   | 2b     | All items from the World Health Organization Trial Registration Data Set                                                                                                                                                                                                                 | NA   |
| Protocol version                  | 3      | Date and version identifier                                                                                                                                                                                                                                                              | NA   |
| Funding                           | 4      | Sources and types of financial, material, and other support                                                                                                                                                                                                                              | P15  |
| Roles and responsibilities        | 5a     | Names, affiliations, and roles of protocol contributors                                                                                                                                                                                                                                  | P1   |
|                                   | 5b     | Name and contact information for the trial sponsor                                                                                                                                                                                                                                       | NA   |
|                                   | 5c     | Role of study sponsor and funders, if any, in study design; collection, management, analysis, and interpretation of data; writing of the report; and the decision to submit the report for publication, including whether they will have ultimate authority over any of these activities | NA   |
|                                   | 5d     | Composition, roles, and responsibilities of the coordinating centre, steering committee, endpoint adjudication committee, data management team, and other individuals or groups overseeing the trial, if applicable (see Item 21a for data monitoring committee)                         | NA   |
| <b>Introduction</b>               |        |                                                                                                                                                                                                                                                                                          |      |
| Background and rationale          | 6a     | Description of research question and justification for undertaking the trial, including summary of relevant studies (published and unpublished) examining benefits and harms for each intervention                                                                                       | P4-6 |

|    |                                                           |     |                                                                                                                                                                                                                                                                                                                                                                                                            |
|----|-----------------------------------------------------------|-----|------------------------------------------------------------------------------------------------------------------------------------------------------------------------------------------------------------------------------------------------------------------------------------------------------------------------------------------------------------------------------------------------------------|
| 1  |                                                           |     |                                                                                                                                                                                                                                                                                                                                                                                                            |
| 2  |                                                           | 6b  | Explanation for choice of comparators P4-6                                                                                                                                                                                                                                                                                                                                                                 |
| 3  |                                                           |     |                                                                                                                                                                                                                                                                                                                                                                                                            |
| 4  | Objectives                                                | 7   | Specific objectives or hypotheses P6                                                                                                                                                                                                                                                                                                                                                                       |
| 5  |                                                           |     |                                                                                                                                                                                                                                                                                                                                                                                                            |
| 6  | Trial design                                              | 8   | Description of trial design including type of trial (eg, P6<br>parallel group, crossover, factorial, single group),<br>allocation ratio, and framework (eg, superiority,<br>equivalence, noninferiority, exploratory)                                                                                                                                                                                      |
| 7  |                                                           |     |                                                                                                                                                                                                                                                                                                                                                                                                            |
| 8  |                                                           |     |                                                                                                                                                                                                                                                                                                                                                                                                            |
| 9  |                                                           |     |                                                                                                                                                                                                                                                                                                                                                                                                            |
| 10 |                                                           |     |                                                                                                                                                                                                                                                                                                                                                                                                            |
| 11 |                                                           |     |                                                                                                                                                                                                                                                                                                                                                                                                            |
| 12 | <b>Methods: Participants, interventions, and outcomes</b> |     |                                                                                                                                                                                                                                                                                                                                                                                                            |
| 13 |                                                           |     |                                                                                                                                                                                                                                                                                                                                                                                                            |
| 14 | Study setting                                             | 9   | Description of study settings (eg, community clinic, P6-7<br>academic hospital) and list of countries where data<br>will be collected. Reference to where list of study<br>sites can be obtained                                                                                                                                                                                                           |
| 15 |                                                           |     |                                                                                                                                                                                                                                                                                                                                                                                                            |
| 16 |                                                           |     |                                                                                                                                                                                                                                                                                                                                                                                                            |
| 17 |                                                           |     |                                                                                                                                                                                                                                                                                                                                                                                                            |
| 18 |                                                           |     |                                                                                                                                                                                                                                                                                                                                                                                                            |
| 19 | Eligibility criteria                                      | 10  | Inclusion and exclusion criteria for participants. If P6-7<br>applicable, eligibility criteria for study centres and<br>individuals who will perform the interventions (eg,<br>surgeons, psychotherapists)                                                                                                                                                                                                 |
| 20 |                                                           |     |                                                                                                                                                                                                                                                                                                                                                                                                            |
| 21 |                                                           |     |                                                                                                                                                                                                                                                                                                                                                                                                            |
| 22 |                                                           |     |                                                                                                                                                                                                                                                                                                                                                                                                            |
| 23 |                                                           |     |                                                                                                                                                                                                                                                                                                                                                                                                            |
| 24 |                                                           |     |                                                                                                                                                                                                                                                                                                                                                                                                            |
| 25 | Interventions                                             | 11a | Interventions for each group with sufficient detail to P7-9<br>allow replication, including how and when they will<br>be administered                                                                                                                                                                                                                                                                      |
| 26 |                                                           |     |                                                                                                                                                                                                                                                                                                                                                                                                            |
| 27 |                                                           |     |                                                                                                                                                                                                                                                                                                                                                                                                            |
| 28 |                                                           |     |                                                                                                                                                                                                                                                                                                                                                                                                            |
| 29 |                                                           |     |                                                                                                                                                                                                                                                                                                                                                                                                            |
| 30 |                                                           | 11b | Criteria for discontinuing or modifying allocated P7-9<br>interventions for a given trial participant (eg, drug<br>dose change in response to harms, participant<br>request, or improving/worsening disease)                                                                                                                                                                                               |
| 31 |                                                           |     |                                                                                                                                                                                                                                                                                                                                                                                                            |
| 32 |                                                           |     |                                                                                                                                                                                                                                                                                                                                                                                                            |
| 33 |                                                           |     |                                                                                                                                                                                                                                                                                                                                                                                                            |
| 34 |                                                           |     |                                                                                                                                                                                                                                                                                                                                                                                                            |
| 35 |                                                           | 11c | Strategies to improve adherence to intervention P7-9<br>protocols, and any procedures for monitoring<br>adherence (eg, drug tablet return, laboratory tests)                                                                                                                                                                                                                                               |
| 36 |                                                           |     |                                                                                                                                                                                                                                                                                                                                                                                                            |
| 37 |                                                           |     |                                                                                                                                                                                                                                                                                                                                                                                                            |
| 38 |                                                           |     |                                                                                                                                                                                                                                                                                                                                                                                                            |
| 39 |                                                           |     |                                                                                                                                                                                                                                                                                                                                                                                                            |
| 40 |                                                           | 11d | Relevant concomitant care and interventions that P7-9<br>are permitted or prohibited during the trial                                                                                                                                                                                                                                                                                                      |
| 41 |                                                           |     |                                                                                                                                                                                                                                                                                                                                                                                                            |
| 42 |                                                           |     |                                                                                                                                                                                                                                                                                                                                                                                                            |
| 43 | Outcomes                                                  | 12  | Primary, secondary, and other outcomes, including P10-12<br>the specific measurement variable (eg, systolic<br>blood pressure), analysis metric (eg, change from<br>baseline, final value, time to event), method of<br>aggregation (eg, median, proportion), and time<br>point for each outcome. Explanation of the clinical<br>relevance of chosen efficacy and harm outcomes<br>is strongly recommended |
| 44 |                                                           |     |                                                                                                                                                                                                                                                                                                                                                                                                            |
| 45 |                                                           |     |                                                                                                                                                                                                                                                                                                                                                                                                            |
| 46 |                                                           |     |                                                                                                                                                                                                                                                                                                                                                                                                            |
| 47 |                                                           |     |                                                                                                                                                                                                                                                                                                                                                                                                            |
| 48 |                                                           |     |                                                                                                                                                                                                                                                                                                                                                                                                            |
| 49 |                                                           |     |                                                                                                                                                                                                                                                                                                                                                                                                            |
| 50 |                                                           |     |                                                                                                                                                                                                                                                                                                                                                                                                            |
| 51 |                                                           |     |                                                                                                                                                                                                                                                                                                                                                                                                            |
| 52 |                                                           |     |                                                                                                                                                                                                                                                                                                                                                                                                            |
| 53 | Participant                                               | 13  | Time schedule of enrolment, interventions P6-7<br>timeline (including any run-ins and washouts),<br>assessments, and visits for participants. A<br>schematic diagram is highly recommended (see<br>Figure)                                                                                                                                                                                                 |
| 54 |                                                           |     |                                                                                                                                                                                                                                                                                                                                                                                                            |
| 55 |                                                           |     |                                                                                                                                                                                                                                                                                                                                                                                                            |
| 56 |                                                           |     |                                                                                                                                                                                                                                                                                                                                                                                                            |
| 57 |                                                           |     |                                                                                                                                                                                                                                                                                                                                                                                                            |
| 58 |                                                           |     |                                                                                                                                                                                                                                                                                                                                                                                                            |
| 59 |                                                           |     |                                                                                                                                                                                                                                                                                                                                                                                                            |
| 60 |                                                           |     |                                                                                                                                                                                                                                                                                                                                                                                                            |

|   |             |    |                                                |      |
|---|-------------|----|------------------------------------------------|------|
| 1 |             |    |                                                |      |
| 2 | Sample size | 14 | Estimated number of participants needed to     | P12  |
| 3 |             |    | achieve study objectives and how it was        |      |
| 4 |             |    | determined, including clinical and statistical |      |
| 5 |             |    | assumptions supporting any sample size         |      |
| 6 |             |    | calculations                                   |      |
| 7 |             |    |                                                |      |
| 8 | Recruitment | 15 | Strategies for achieving adequate participant  | P6-7 |
| 9 |             |    | enrolment to reach target sample size          |      |

### Methods: Assignment of interventions (for controlled trials)

#### Allocation:

|    |                |     |                                                        |    |
|----|----------------|-----|--------------------------------------------------------|----|
| 15 |                |     |                                                        |    |
| 16 | Sequence       | 16a | Method of generating the allocation sequence (eg,      | P7 |
| 17 | generation     |     | computer-generated random numbers), and list of        |    |
| 18 |                |     | any factors for stratification. To reduce              |    |
| 19 |                |     | predictability of a random sequence, details of any    |    |
| 20 |                |     | planned restriction (eg, blocking) should be           |    |
| 21 |                |     | provided in a separate document that is                |    |
| 22 |                |     | unavailable to those who enrol participants or         |    |
| 23 |                |     | assign interventions                                   |    |
| 24 |                |     |                                                        |    |
| 25 |                |     |                                                        |    |
| 26 | Allocation     | 16b | Mechanism of implementing the allocation               | P7 |
| 27 | concealment    |     | sequence (eg, central telephone; sequentially          |    |
| 28 | mechanism      |     | numbered, opaque, sealed envelopes), describing        |    |
| 29 |                |     | any steps to conceal the sequence until                |    |
| 30 |                |     | interventions are assigned                             |    |
| 31 |                |     |                                                        |    |
| 32 |                |     |                                                        |    |
| 33 | Implementation | 16c | Who will generate the allocation sequence, who         | P7 |
| 34 |                |     | will enrol participants, and who will assign           |    |
| 35 |                |     | participants to interventions                          |    |
| 36 |                |     |                                                        |    |
| 37 |                |     |                                                        |    |
| 38 | Blinding       | 17a | Who will be blinded after assignment to                | P7 |
| 39 | (masking)      |     | interventions (eg, trial participants, care providers, |    |
| 40 |                |     | outcome assessors, data analysts), and how             |    |
| 41 |                |     |                                                        |    |
| 42 |                | 17b | If blinded, circumstances under which unblinding is    | P7 |
| 43 |                |     | permissible, and procedure for revealing a             |    |
| 44 |                |     | participant's allocated intervention during the trial  |    |
| 45 |                |     |                                                        |    |

### Methods: Data collection, management, and analysis

|    |                 |     |                                                        |     |
|----|-----------------|-----|--------------------------------------------------------|-----|
| 47 |                 |     |                                                        |     |
| 48 |                 |     |                                                        |     |
| 49 | Data collection | 18a | Plans for assessment and collection of outcome,        | P13 |
| 50 | methods         |     | baseline, and other trial data, including any related  |     |
| 51 |                 |     | processes to promote data quality (eg, duplicate       |     |
| 52 |                 |     | measurements, training of assessors) and a             |     |
| 53 |                 |     | description of study instruments (eg,                  |     |
| 54 |                 |     | questionnaires, laboratory tests) along with their     |     |
| 55 |                 |     | reliability and validity, if known. Reference to where |     |
| 56 |                 |     | data collection forms can be found, if not in the      |     |
| 57 |                 |     | protocol                                               |     |
| 58 |                 |     |                                                        |     |
| 59 |                 |     |                                                        |     |
| 60 |                 |     |                                                        |     |

|    |                                 |     |                                                        |        |
|----|---------------------------------|-----|--------------------------------------------------------|--------|
| 1  |                                 |     |                                                        |        |
| 2  |                                 | 18b | Plans to promote participant retention and             | P13    |
| 3  |                                 |     | complete follow-up, including list of any outcome      |        |
| 4  |                                 |     | data to be collected for participants who              |        |
| 5  |                                 |     | discontinue or deviate from intervention protocols     |        |
| 6  |                                 |     |                                                        |        |
| 7  | Data                            | 19  | Plans for data entry, coding, security, and storage,   | P13    |
| 8  | management                      |     | including any related processes to promote data        |        |
| 9  |                                 |     | quality (eg, double data entry; range checks for       |        |
| 10 |                                 |     | data values). Reference to where details of data       |        |
| 11 |                                 |     | management procedures can be found, if not in the      |        |
| 12 |                                 |     | protocol                                               |        |
| 13 |                                 |     |                                                        |        |
| 14 |                                 |     |                                                        |        |
| 15 | Statistical                     | 20a | Statistical methods for analysing primary and          | P12-13 |
| 16 | methods                         |     | secondary outcomes. Reference to where other           |        |
| 17 |                                 |     | details of the statistical analysis plan can be found, |        |
| 18 |                                 |     | if not in the protocol                                 |        |
| 19 |                                 |     |                                                        |        |
| 20 |                                 |     |                                                        |        |
| 21 |                                 | 20b | Methods for any additional analyses (eg, subgroup      | P12-13 |
| 22 |                                 |     | and adjusted analyses)                                 |        |
| 23 |                                 |     |                                                        |        |
| 24 |                                 | 20c | Definition of analysis population relating to protocol | P12-13 |
| 25 |                                 |     | non-adherence (eg, as randomised analysis), and        |        |
| 26 |                                 |     | any statistical methods to handle missing data (eg,    |        |
| 27 |                                 |     | multiple imputation)                                   |        |
| 28 |                                 |     |                                                        |        |
| 29 |                                 |     |                                                        |        |
| 30 | <b>Methods: Monitoring</b>      |     |                                                        |        |
| 31 |                                 |     |                                                        |        |
| 32 | Data monitoring                 | 21a | Composition of data monitoring committee (DMC);        | P13    |
| 33 |                                 |     | summary of its role and reporting structure;           |        |
| 34 |                                 |     | statement of whether it is independent from the        |        |
| 35 |                                 |     | sponsor and competing interests; and reference to      |        |
| 36 |                                 |     | where further details about its charter can be         |        |
| 37 |                                 |     | found, if not in the protocol. Alternatively, an       |        |
| 38 |                                 |     | explanation of why a DMC is not needed                 |        |
| 39 |                                 |     |                                                        |        |
| 40 |                                 |     |                                                        |        |
| 41 |                                 | 21b | Description of any interim analyses and stopping       | NA     |
| 42 |                                 |     | guidelines, including who will have access to these    |        |
| 43 |                                 |     | interim results and make the final decision to         |        |
| 44 |                                 |     | terminate the trial                                    |        |
| 45 |                                 |     |                                                        |        |
| 46 |                                 |     |                                                        |        |
| 47 | Harms                           | 22  | Plans for collecting, assessing, reporting, and        | NA     |
| 48 |                                 |     | managing solicited and spontaneously reported          |        |
| 49 |                                 |     | adverse events and other unintended effects of         |        |
| 50 |                                 |     | trial interventions or trial conduct                   |        |
| 51 |                                 |     |                                                        |        |
| 52 |                                 |     |                                                        |        |
| 53 | Auditing                        | 23  | Frequency and procedures for auditing trial            | NA     |
| 54 |                                 |     | conduct, if any, and whether the process will be       |        |
| 55 |                                 |     | independent from investigators and the sponsor         |        |
| 56 |                                 |     |                                                        |        |
| 57 |                                 |     |                                                        |        |
| 58 | <b>Ethics and dissemination</b> |     |                                                        |        |
| 59 |                                 |     |                                                        |        |
| 60 |                                 |     |                                                        |        |

|    |                 |     |                                                        |         |
|----|-----------------|-----|--------------------------------------------------------|---------|
| 1  |                 |     |                                                        |         |
| 2  | Research ethics | 24  | Plans for seeking research ethics                      | P13-P14 |
| 3  | approval        |     | committee/institutional review board (REC/IRB)         |         |
| 4  |                 |     | approval                                               |         |
| 5  |                 |     |                                                        |         |
| 6  | Protocol        | 25  | Plans for communicating important protocol             | NA      |
| 7  | amendments      |     | modifications (eg, changes to eligibility criteria,    |         |
| 8  |                 |     | outcomes, analyses) to relevant parties (eg,           |         |
| 9  |                 |     | investigators, REC/IRBs, trial participants, trial     |         |
| 10 |                 |     | registries, journals, regulators)                      |         |
| 11 |                 |     |                                                        |         |
| 12 |                 |     |                                                        |         |
| 13 | Consent or      | 26a | Who will obtain informed consent or assent from        | P6-7    |
| 14 | assent          |     | potential trial participants or authorised surrogates, |         |
| 15 |                 |     | and how (see Item 32)                                  |         |
| 16 |                 |     |                                                        |         |
| 17 |                 |     |                                                        |         |
| 18 |                 | 26b | Additional consent provisions for collection and use   | NA      |
| 19 |                 |     | of participant data and biological specimens in        |         |
| 20 |                 |     | ancillary studies, if applicable                       |         |
| 21 |                 |     |                                                        |         |
| 22 | Confidentiality | 27  | How personal information about potential and           | P13     |
| 23 |                 |     | enrolled participants will be collected, shared, and   |         |
| 24 |                 |     | maintained in order to protect confidentiality         |         |
| 25 |                 |     | before, during, and after the trial                    |         |
| 26 |                 |     |                                                        |         |
| 27 |                 |     |                                                        |         |
| 28 | Declaration of  | 28  | Financial and other competing interests for            | P15     |
| 29 | interests       |     | principal investigators for the overall trial and each |         |
| 30 |                 |     | study site                                             |         |
| 31 |                 |     |                                                        |         |
| 32 | Access to data  | 29  | Statement of who will have access to the final trial   | P16     |
| 33 |                 |     | dataset, and disclosure of contractual agreements      |         |
| 34 |                 |     | that limit such access for investigators               |         |
| 35 |                 |     |                                                        |         |
| 36 |                 |     |                                                        |         |
| 37 | Ancillary and   | 30  | Provisions, if any, for ancillary and post-trial care, | NA      |
| 38 | post-trial care |     | and for compensation to those who suffer harm          |         |
| 39 |                 |     | from trial participation                               |         |
| 40 |                 |     |                                                        |         |
| 41 | Dissemination   | 31a | Plans for investigators and sponsor to                 | P14     |
| 42 | policy          |     | communicate trial results to participants,             |         |
| 43 |                 |     | healthcare professionals, the public, and other        |         |
| 44 |                 |     | relevant groups (eg, via publication, reporting in     |         |
| 45 |                 |     | results databases, or other data sharing               |         |
| 46 |                 |     | arrangements), including any publication               |         |
| 47 |                 |     | restrictions                                           |         |
| 48 |                 |     |                                                        |         |
| 49 |                 |     |                                                        |         |
| 50 |                 |     |                                                        |         |
| 51 |                 | 31b | Authorship eligibility guidelines and any intended     | P14     |
| 52 |                 |     | use of professional writers                            |         |
| 53 |                 |     |                                                        |         |
| 54 |                 | 31c | Plans, if any, for granting public access to the full  | P14     |
| 55 |                 |     | protocol, participant-level dataset, and statistical   |         |
| 56 |                 |     | code                                                   |         |
| 57 |                 |     |                                                        |         |

## Appendices

|                        |                            |    |                                                                                                                                                                                                |                        |
|------------------------|----------------------------|----|------------------------------------------------------------------------------------------------------------------------------------------------------------------------------------------------|------------------------|
| 1<br>2<br>3<br>4<br>5  | Informed consent materials | 32 | Model consent form and other related documentation given to participants and authorised surrogates                                                                                             | See supplementary file |
| 6<br>7<br>8<br>9<br>10 | Biological specimens       | 33 | Plans for collection, laboratory evaluation, and storage of biological specimens for genetic or molecular analysis in the current trial and for future use in ancillary studies, if applicable | NA                     |

---

\*It is strongly recommended that this checklist be read in conjunction with the SPIRIT 2013 Explanation & Elaboration for important clarification on the items. Amendments to the protocol should be tracked and dated. The SPIRIT checklist is copyrighted by the SPIRIT Group under the Creative Commons "[Attribution-NonCommercial-NoDerivs 3.0 Unported](#)" license.

↑  
or peer review only
